# Supplementary material for: Effect of antimicrobial washout from anaerobic digesters on microbial community composition
Source: Royal Society of Chemistry journal article supplement (doi:10.1039/d0ew00094a), 2020-01-01
Supplement: d0ew00094a2.xlsx [file d0ew00094a2.xlsx]

## Sheet: E-supplementary
	TCS Background - Day 0		TCC Background - Day 0		None Control - Day 0		TCS Background - Day 45		TCS Low - Gradual - Day 45		TCS Medium - Gradual - Day 45		TCS Low - Immediate - Day 45		TCS Medium - Immediate - Day 45		TCC Background - Day 45		TCC Low - Gradual - Day 45		TCC Medium - Gradual - Day 45		TCC Low - Immediate - Day 45		None Control - Day 45		TCS Background - Day 110		TCS Low - Gradual - Day 110		TCS Medium - Gradual - Day 110		TCS Low - Immediate - Day 110		TCS Medium - Immediate - Day 110		TCC Background - Day 110		TCC Low - Gradual - Day 110		TCC Medium - Gradual - Day 110		TCC Low - Immediate - Day 110		None Control - Day 110		TCS Background - Day 180		TCS Low - Gradual - Day 180
ID	Average	Stdev	Average	Stdev	Average	Stdev	Average	Stdev	Average	Stdev	Average	Stdev	Average	Stdev	Average	Stdev	Average	Stdev	Average	Stdev	Average	Stdev	Average	Stdev	Average	Stdev	Average	Stdev	Average	Stdev	Average	Stdev	Average	Stdev	Average	Stdev	Average	Stdev	Average	Stdev	Average	Stdev	Average	Stdev	Average	Stdev	Average	Stdev	Average
ID_1	0.127259	0.0774152	0.195041	0.0532445	0.144855	0.0207393	0.131716	0.0288347	0.108649	0.0129389	0.118156	0.0294587	0.0810297	0.0105126	0.0835489	0.0120556	0.120766	0.0286407	0.0682848	0.00955332	0.12061	0.0089053	0.11357	0.0164168	0.063614	0.0164043	0.097603	0.0197668	0.0521274	0.025371	0.0965366	0.0133943	0.0401233	0.0215376	0.0614839	0.0312808	0.0835978	0.0259933	0.14378	0.0955168	0.147959	0.0394399	0.0899772	0.0509498	0.204701	0.163981	0.0543715	0.0341284	0.0637913
ID_2	0.0495767	0.00911494	0.0402601	0.00415237	0.0395559	0.00444776	0.0530127	0.0102234	0.0858107	0.0277439	0.0683656	0.00548197	0.0849388	0.0261918	0.0768765	0.00262669	0.0462001	0.00733785	0.0709231	0.0266503	0.115287	0.0512635	0.112276	0.0387328	0.128514	0.0208089	0.0552492	0.0126576	0.0938551	0.0221758	0.080657	0.0168729	0.0688138	0.0106157	0.149461	0.0110496	0.0356522	0.0103894	0.0475945	0.00820551	0.160806	0.0166756	0.193606	0.0505837	0.0815781	0.0330023	0.117635	0.0392514	0.139511
ID_3	9.28428e-06	1.31299e-05	0	0	4.54411e-05	6.42634e-05	0	0	0	0	0	0	1.34436e-05	1.90121e-05	0	0	0	0	0	0	0	0	0	0	0	0	0	0	0	0	8.68236e-06	1.22787e-05	1.19239e-05	1.6863e-05	0	0	0.00081636	0.000158093	0.000644901	0.000286472	0.000745219	1.60091e-05	0.000981307	0.000201203	0.00038702	8.73483e-05	0.000943711	0.000279407	0.000917749
ID_4	0.013389	0.00308224	0.00983338	0.00165721	0.0113615	0.000989706	0.0453178	0.00373251	0.0434859	0.00959056	0.0443461	0.0138357	0.0340615	0.0094482	0.0344072	0.00206646	0.0522824	0.0115173	0.0443875	0.00228982	0.0441924	0.00617681	0.081305	0.0292002	0.036836	0.0093729	0.0198755	0.00639653	0.0358671	0.00968475	0.0539608	0.00194424	0.0226573	0.0135978	0.0581925	0.0098221	0.0370768	0.00259544	0.0316392	0.00782151	0.0365126	0.00447292	0.0494497	0.00867242	0.0465171	0.00980692	0.051355	0.0319588	0.0415382
ID_5	0.00447107	0.000968927	0.00710489	0.000795644	0.0074288	0.000279518	0.000307849	0.000184861	0.000393771	0.000123736	0.000402069	0.000104712	0.000309461	7.40786e-05	0.000233704	6.42294e-05	0.000288712	9.3323e-05	0.000213814	7.94631e-05	0.000230051	0.000162817	0.000360325	0.000103621	0.00028669	0.000106461	0.000137464	5.64188e-05	0.000164131	0.000100373	0.000198687	6.83724e-05	0.000114945	3.29419e-05	9.09314e-05	3.27978e-05	0.000775332	0.000195582	0.000948543	0.000301476	0.00229535	0.00131956	0.00113805	5.51505e-05	0.00154937	0.000122375	0.000982648	0.000411586	0.000418874
ID_6	4.99052e-05	7.05766e-05	1.80307e-05	2.54992e-05	7.95272e-05	1.00967e-05	0.00723085	0.00801553	0.00218227	0.00182937	0.00178555	0.00100917	0.00733565	0.00588321	0.00709037	0.00281969	0.0013469	0.00071307	0.00454156	0.00278954	0.00107354	0.000672263	0.00151219	0.000405358	0.00516135	0.00448474	0.00228903	0.00106932	0.0063275	0.00223145	0.00774101	0.00428422	0.0369898	0.00110554	0.00171193	0.000969838	0.0246962	0.00990714	0.116446	0.0744979	0.00570271	0.00414183	0.0153212	0.00115571	0.0217134	0.0294153	0.000536663	0.000430001	0.0154305
ID_7	0.000120696	0.000170689	0.000246076	0.000118149	9.40698e-05	8.4277e-05	8.71095e-05	7.21364e-05	0.000875192	0.000346314	0.000816388	0.000192495	0.000678447	0.000128891	0.000897919	9.76941e-05	0.00215685	0.000505369	0.0012275	0.000272311	0.000402338	0.000216063	0.000576807	0.000205451	0.00116177	0.000333638	0.000893112	0.000297315	0.00125759	0.000720614	0.000778604	0.00043689	0.0019961	0.0016011	0.000752087	0.000198879	0.00251706	0.00121885	0.00151751	0.000852763	0.000684943	0.000515026	0.000826427	0.000306843	0.00285392	0.00207463	0.00541356	0.00237329	0.00227498
ID_8	0.0236958	0.0063577	0.021825	0.00221384	0.021607	0.00291432	0.004327	0.000677476	0.00363292	0.000291915	0.00404782	0.000599289	0.00452548	0.00150189	0.00408379	0.000890158	0.00664201	0.00191256	0.00467764	0.00065819	0.00461963	0.00074369	0.00445875	0.00125105	0.00378776	0.00074767	0.00745162	0.00321469	0.0061712	0.000990805	0.00681484	0.00281755	0.00583847	0.00145829	0.00568528	0.00147475	0.0109289	0.00152975	0.00773932	0.00159027	0.0153524	0.00090649	0.00554827	0.000886035	0.0109562	0.00366656	0.100538	0.0701842	0.0369924
ID_9	0.014754	0.00309007	0.0110052	0.00133153	0.0102661	0.0020546	0.0248862	0.00441607	0.0254958	0.00255041	0.0274808	0.00491793	0.023762	0.00383414	0.0251489	0.00320681	0.040039	0.00164768	0.024863	0.00352258	0.0271476	0.00783676	0.033422	0.00541626	0.0207893	0.00630211	0.0240727	0.00398518	0.0183875	0.00478769	0.0270082	0.0105992	0.0181616	0.00053123	0.0241746	0.0035936	0.0356968	0.00257805	0.0196705	0.00395999	0.0203072	0.00399383	0.0186291	0.00828442	0.0206298	0.00633659	0.0244511	0.00309656	0.0257559
ID_11	0.000170775	5.94925e-05	0.000225007	4.30004e-05	0.000133146	4.40122e-05	0.000202446	0.000148775	0.00161578	0.00195074	0.00344429	0.00438509	0.00157793	0.00123744	0.00169111	0.00100001	0.000216654	0.000156347	0.000355084	0.000183338	0.00041002	0.000192245	0.000194692	0.000120034	0.000212383	7.2272e-05	7.22694e-05	9.37984e-06	0.000111247	3.88034e-05	0.000214037	0.000163623	0.000110207	7.12078e-05	0.000301094	0.000255969	0.000406438	0.000100952	0.000431261	0.000437482	0.00913713	0.00778462	0.00031327	0.000102711	0.000495335	0.000177553	0.000313488	0.000216037	0.000475525
ID_12	0.000761649	6.63688e-05	0.000724279	0.000155058	0.00092023	0.000223724	0.00245267	0.000392266	0.0148262	0.0109615	0.0121703	0.00423488	0.015198	0.0105173	0.0111014	0.00553374	0.00174507	0.00021602	0.00903122	0.00189943	0.0107276	0.0077097	0.0105434	0.00705658	0.0222829	0.00755277	0.0126319	0.00823048	0.0170655	0.00603615	0.0255273	0.0077484	0.0432279	0.0138216	0.0149158	0.00319528	0.00544239	0.00311564	0.0312376	0.0049603	0.00787173	0.00422314	0.0137389	0.0057482	0.0673933	0.0400986	0.0984717	0.0339138	0.0703504
ID_13	0.00158923	0.000383105	0.00163279	0.000170839	0.00144103	0.000186226	0.00755507	0.000425235	0.00817282	0.00158229	0.00827024	0.0017146	0.0110329	0.0011207	0.0078807	0.000493623	0.00648179	0.00379514	0.00613376	0.00160959	0.00536327	0.00116214	0.00661837	0.00244672	0.00719276	0.00123068	0.0220538	0.00842325	0.0367438	0.00159828	0.0202436	0.00189595	0.0245192	0.00441793	0.0375424	0.00863476	0.0170787	0.00129145	0.00936119	0.000898715	0.0178947	0.00187714	0.00987052	0.00132097	0.00680274	0.00360335	0.0184874	0.0122054	0.0296305
ID_14	0.000210635	9.32497e-05	0.000187579	0.000162076	0.000159054	2.01935e-05	0.00389026	0.00276164	0.00700759	0.000427767	0.00609371	0.00155409	0.00931162	0.00426264	0.00612008	0.00111793	0.00490487	0.00243381	0.00594817	0.000643905	0.00875609	0.000424407	0.00383173	0.000875311	0.00485656	0.000430413	0.00582197	0.00173446	0.00722952	0.00055242	0.00753925	0.0019826	0.00979767	0.00526404	0.0112933	0.00253273	0.00799949	0.00132436	0.00637347	0.0036971	0.00657778	0.00347819	0.0113536	0.00319011	0.0134294	0.00687668	0.0175409	0.00750906	0.0153445
ID_15	0.00152198	0.000307568	0.000975956	0.00034699	0.00131289	6.70236e-05	0.0517488	0.0411919	0.0271674	0.0163483	0.0623126	0.0204365	0.0152918	0.0087899	0.18491	0.00990825	0.0587345	0.0106775	0.00930583	0.00642166	0.0254451	0.0336053	0.114277	0.0488815	0.0244505	0.0300612	0.128625	0.0118778	0.0362714	0.0221788	0.048187	0.0144007	0.0586284	0.00393673	0.110191	0.0361406	0.0580521	0.0318202	0.0120872	0.00557495	0.0514074	0.00661491	0.0447113	0.0257775	0.048297	0.040893	0.00219128	0.0019085	0.00910273
ID_16	0.00259168	0.000268068	0.00220449	0.000453281	0.00248582	0.000185883	0.00516779	0.00215855	0.0057777	0.000902378	0.0192875	0.017307	0.0146884	0.00359665	0.0105498	0.0015904	0.00551632	0.00602195	0.00756688	0.00467917	0.00303159	0.00173972	0.00180355	0.00126704	0.0134929	0.0079768	0.0613945	0.0289757	0.0322567	0.0323306	0.0245502	0.0161106	0.117805	0.0540449	0.0181286	0.0171048	0.025288	0.0169901	0.0520933	0.0356272	0.0275093	0.015547	0.00326695	0.000249114	0.0104275	0.00571849	0.0911911	0.0496725	0.033041
ID_17	0.00585531	0.00133251	0.00463657	0.000566639	0.0067377	0.00100879	0.0171446	0.0170379	0.0351097	0.00684277	0.0329087	0.00254898	0.0252859	0.00587792	0.0327037	0.000945534	0.0347253	0.00528032	0.024102	0.00482917	0.0312149	0.0108381	0.0374986	0.0033961	0.0399399	0.00659694	0.026375	0.00885401	0.0145028	0.00312155	0.0351461	0.0154858	0.0194243	0.00334103	0.0285694	0.00446189	0.0275242	0.00219943	0.0136183	0.00153513	0.000503359	0.000145477	0.0140925	0.00883365	0.0167757	0.00637669	0.0158075	0.0085689	0.0208489
ID_18	0.00881087	0.0014175	0.00710921	0.00265138	0.00687559	0.00102491	0.0148048	0.00191727	0.0120291	0.000454873	0.0151212	0.00111027	0.0148962	0.00475462	0.0115812	0.00204654	0.0161788	0.00130489	0.0105611	0.00155025	0.0148864	0.00408231	0.0120994	0.00126063	0.0211948	0.0020578	0.0246861	0.00449965	0.0209039	0.00313197	0.0181557	0.00326145	0.0149705	0.00140574	0.0205417	0.00532523	0.0185793	0.000611836	0.0167223	0.0016257	0.0148642	0.00146346	0.0187351	0.000396228	0.0183128	0.00666028	0.0212206	0.00279919	0.0146422
ID_19	0.000182783	8.95356e-05	0.00011001	0.000104753	0.000129959	9.22247e-05	0.0114197	0.00482802	0.0129261	0.00181324	0.011558	0.00457379	0.0273761	0.00561201	0.0122405	0.000763857	0.0162959	0.00414992	0.0139927	0.00365253	0.00704327	0.0022011	0.0177973	0.00394571	0.016529	0.00368703	0.00468589	0.00120914	0.0092469	0.00193357	0.00743149	0.00348385	0.0120663	0.00381386	0.00544817	0.00198373	0.00847412	0.00148803	0.000959532	0.000375504	0.00175316	0.000589733	0.00256054	0.00060696	0.00842419	0.00182748	0.00555354	0.000377189	0.0101454
ID_20	0.0109432	0.00156001	0.00892649	0.00142335	0.00795573	0.00150912	0.0334037	0.00126534	0.0346296	0.00249168	0.035664	0.0014437	0.0409561	0.00536056	0.0328763	0.000841741	0.0390207	0.00466287	0.0400916	0.00221663	0.0369998	0.00615978	0.0329659	0.00453983	0.0293124	0.00155343	0.029926	0.00813709	0.0344673	0.01254	0.0382413	0.00662934	0.0168719	0.0020376	0.0291036	0.00617972	0.0479555	0.00691031	0.0221351	0.00351748	0.0347434	0.00934263	0.0222097	0.00676174	0.0183977	0.000169065	0.0159376	0.00694948	0.0142775
ID_21	5.45331e-05	7.71214e-05	1.80307e-05	2.54992e-05	0	0	2.0722e-05	2.93053e-05	0.0004184	0.000309303	0.000698915	0.000988415	0.00034734	0.000338678	0.0005916	0.000275923	3.48678e-05	2.51357e-05	0.000107736	7.97343e-05	1.47304e-05	2.08319e-05	0	0	5.1271e-05	1.39275e-05	1.97765e-05	2.79682e-05	4.14508e-05	5.86203e-05	5.42287e-05	5.53536e-05	1.14536e-05	1.61978e-05	4.31281e-05	3.05248e-05	0.000263735	0.000110403	9.50079e-05	5.26439e-05	0.00283044	0.00233952	0.000179542	6.81377e-05	7.68138e-05	0.000108631	0.000334922	0.000101594	9.07228e-05
ID_22	0.0537199	0.0118114	0.0440678	0.0063103	0.0501306	0.00328248	0.000925037	0.000266418	0.065632	0.0425385	0.082848	0.0240681	0.0475981	0.0637031	0.0672505	0.0103732	0.101738	0.0308373	0.0471351	0.0297482	0.0318413	0.0358018	0.0257514	0.0271385	0.0197092	0.0117457	0.000479877	0.000133229	0.000457131	4.09775e-05	0.000782252	5.02951e-05	0.000383054	7.19367e-05	0.00274065	0.00142252	0.0126959	0.00603936	0.00246406	0.00294875	0.000489699	0.000600036	0.00336998	0.00370128	8.24636e-05	5.87197e-05	0	0	4.8341e-05
ID_23	0.0139749	0.00832734	0.0200229	0.00460167	0.0125393	0.000937465	0.0384258	0.00871686	0.0300951	0.00492056	0.0327751	0.00482903	0.0263283	0.00538483	0.0256305	0.00289401	0.0368831	0.00744311	0.0230548	0.00591406	0.0333455	0.00437236	0.0274915	0.00633145	0.0194207	0.00430716	0.00212449	0.0011346	0.0218273	0.00873909	0.014244	0.00912169	0.0100324	0.00661199	0.00696573	0.00114726	0.00277806	0.00181681	0.0302581	0.0214073	0.0226325	0.00296335	0.00938262	0.00452026	0.0463483	0.0236481	0.00145017	0.000730638	0.000904222
ID_24	0.00145382	0.000824719	0.000758239	0.000414479	0.000603934	0.000154204	0.0174725	0.00461585	0.0142972	0.0031631	0.0231449	0.0023415	0.0250334	0.00153835	0.0194807	0.00946452	0.00755205	0.00558577	0.0246689	0.00546335	0.0143428	0.0059736	0.00582537	0.00223064	0.0390431	0.00843787	0.0562407	0.0320179	0.0424981	0.0100787	0.0334245	0.00270058	0.0253232	0.00722327	0.00946644	0.00430784	0.019891	0.00592865	0.0536122	0.0196857	0.0349856	0.0184888	0.0108332	0.00698671	0.0161825	0.00977542	0.0186184	0.0080007	0.0263566
ID_25	0.000448537	0.000149055	0.000728991	0.000378538	0.00056943	9.78627e-05	0.0229875	0.0143648	0.00504063	0.00249144	0.00225842	0.000768754	0.00974576	0.00869489	0.00400207	0.00259824	0.00247875	0.000346239	0.00533003	0.00138511	0.024523	0.0214541	0.00389418	0.00118576	0.00608345	0.00400708	0.0334766	0.0032567	0.0363739	0.010589	0.0240218	0.0129514	0.00911159	0.00519703	0.00363148	0.00118725	0.0153621	0.0130957	0.0179847	0.00298367	0.00397954	0.000494777	0.0187083	0.010355	0.0343716	0.0190849	0.0303562	0.0124118	0.0139568
ID_26	0.00119681	0.000529948	0.0014949	0.000175493	0.0013201	0.00045163	0.0100653	0.0115714	0.0275825	0.0160317	0.0107236	0.00220683	0.0414666	0.0140245	0.0370722	0.00611165	0.00535154	0.00415238	0.00788355	0.00472916	0.00926598	0.00205247	0.00703008	0.00516415	0.0201306	0.00496265	0.00826627	0.00150512	0.00344009	0.0013146	0.00667401	0.00240393	0.0272611	0.00692101	0.019387	0.0063853	0.00498691	0.00304722	0.00171815	0.000815077	6.86976e-05	4.00588e-05	0.00367048	0.00212152	0.00574475	0.0038154	0.00378857	0.00299721	0.0123718
ID_27	0.00142852	0.000301133	0.00124903	0.000551634	0.00117835	0.000122221	0.0320484	0.0371817	0.0589287	0.0515003	0.00378523	0.00306443	0.0448216	0.0298095	0.00167817	0.000456946	0.00229212	0.00128761	0.0392213	0.0118752	0.0372414	0.0258764	0.00223385	0.000783713	0.0483761	0.0253513	0.000944544	0.000347789	0.00152344	0.00067505	0.0234191	0.0281854	0.00132229	0.000186882	0.00096763	0.000344381	0.00344644	0.000758488	0.00107271	0.00013327	0.0138337	0.0148492	0.0101325	0.00177178	0.00295218	0.000275614	0.00214012	0.000890625	0.00228105
ID_28	0.000168842	5.63473e-05	0.000179094	6.80283e-05	0.000222226	0.000101587	0.000440265	0.000352064	0.000296616	0.000307016	0.000174417	0.000150775	0.000188965	3.49556e-05	0.000170357	1.81883e-05	0.000462028	8.51112e-05	0.000331352	6.17818e-05	0.000983752	0.00078256	0.000209959	0.000125061	0.000193498	4.10016e-05	0.000496282	0.000139129	0.000418063	2.10634e-05	0.000481319	7.34427e-05	0.000159313	8.98965e-05	0.000598787	0.000266172	0.00273534	0.00104068	0.00157191	0.00054432	0.00323792	0.000249555	0.00287642	0.00112679	0.00156902	0.000418132	0.00272377	0.000515728	0.0032249
ID_29	0.0110108	0.00194902	0.00953753	0.00068211	0.0104025	0.00125848	0.0043012	0.00130369	0.00404877	0.000300283	0.00444008	0.000740543	0.00506752	0.000819685	0.00344613	0.000500616	0.00643919	0.000821811	0.0190639	0.01021	0.00533958	0.00127712	0.00989336	0.00546348	0.00959123	0.00557706	0.0460785	0.0189324	0.0940156	0.0644184	0.018187	0.0187936	0.0294443	0.00986334	0.00741612	0.0014174	0.0179563	0.0099217	0.0297468	0.00950129	0.0607303	0.0418026	0.0425462	0.0242584	0.0154642	0.00306552	0.0250659	0.0038333	0.0274437
ID_30	0.0455208	0.0115888	0.0708274	0.0102898	0.0607962	0.0111536	0.0223647	0.00591543	0.0231571	0.00332077	0.0336971	0.00638669	0.0235563	0.00307543	0.0190411	0.00198397	0.0255802	0.00377833	0.0155876	0.00510002	0.0217343	0.00316513	0.020856	0.000918747	0.0157554	0.00497102	0.00181572	0.000236771	0.00167853	0.000144092	0.00402035	0.00188446	0.00131537	0.000550448	0.00215014	0.00066016	0.0013198	0.000207161	0.00166916	0.000866129	0.00144576	0.000422482	0.00224894	0.00141388	0.00236699	0.000998373	0.00114867	0.00065342	0.00126476
ID_31	0.00135003	0.000352834	0.00223632	0.000284004	0.0016673	0.000395278	0.00600009	0.00241352	0.0024728	0.00128434	0.00249973	0.00145198	0.0047219	0.00328085	0.00595378	0.00175446	0.000610246	0.000326516	0.00183409	0.00117503	0.000499816	0.000259813	0.000590737	0.000142201	0.00529557	0.00301389	0.00106756	0.000464533	0.00257547	0.000528698	0.00322176	0.00154524	0.01424	0.000744312	0.00102209	0.000660709	0.00223956	0.0011059	0.00603367	0.000807886	0.00154402	0.00116572	0.00363086	0.000468796	0.0054366	0.00681169	0.000699467	0.000935704	0.00395127
ID_32	0.0274469	0.00513777	0.0239215	0.00410926	0.0253301	0.000937046	0.0299962	0.00106582	0.0214491	0.00303377	0.0247825	0.00548451	0.0246252	0.0112835	0.0278601	0.00370212	0.0154389	0.00141073	0.0124645	0.00300747	0.0188109	0.000972834	0.0230202	0.00187209	0.0198177	0.0035137	0.0287441	0.00157287	0.0107542	0.00171352	0.0201706	0.00226918	0.0138259	0.00350517	0.0154342	0.00216386	0.0133928	0.00047638	0.0038503	0.000286812	0.00104873	0.000617957	0.00565326	0.00189776	0.00940694	0.00287811	0.00811784	0.00326168	0.0122879
ID_33	0.000216814	0.000121566	0.000293815	0.0002688	0.000258115	7.69794e-05	0.00857563	0.00149041	0.00929944	0.00177581	0.0101914	0.000919201	0.0127894	0.00463202	0.00699423	0.00302656	0.0197293	0.00661521	0.00520671	0.000201881	0.00958505	0.00201817	0.00841881	0.00168723	0.0155296	0.00614897	0.0145656	0.00841814	0.00883033	0.00793714	0.00925896	0.00356677	0.00610971	0.00192314	0.00741546	0.00206497	0.00633147	0.00163339	0.0146791	0.00148649	0.014222	0.00168397	0.0063419	0.00484143	0.00534402	0.00107316	0.00525945	0.00161534	0.00572508
ID_34	0.00153663	0.00038753	0.00165612	0.000285866	0.00191555	0.00057783	0.00897186	0.00125841	0.00775455	0.00224333	0.0100724	0.00275624	0.00628004	0.00213386	0.00801148	0.00154188	0.00691041	0.00300672	0.00594425	0.00127238	0.00642105	0.000230889	0.00629138	0.00105785	0.0110127	0.00332015	0.00108353	0.000260683	0.00553051	0.00311415	0.0268276	0.0274076	0.00728205	0.000687299	0.0270606	0.00407886	0.0205804	0.00452186	0.0131641	0.00300575	0.00423188	0.00142698	0.0200903	0.0118134	0.0230372	0.0113409	0.00291135	0.000535859	0.00370005
ID_35	0.0017786	0.000262398	0.00210613	0.000303483	0.00186139	0.000179153	0.0121686	0.000278045	0.0129109	0.00111479	0.0130025	0.00302752	0.0127436	0.00423221	0.0115489	0.0016944	0.00768314	0.000363911	0.00811091	0.00321076	0.00839662	0.00231595	0.0100646	0.000951759	0.00779535	0.000800283	0.0148307	0.000867724	0.013145	0.000745388	0.018616	0.0030696	0.0166904	0.003773	0.0185605	0.00356872	0.0223078	0.00508716	0.0184892	0.00298775	0.017669	0.00413286	0.0220791	0.00323913	0.00433604	0.00186935	0.00864488	0.001844	0.0126455
ID_36	0.0511654	0.00548714	0.0444537	0.00198191	0.0581148	0.00510971	0.0542452	0.0224434	0.0099467	0.00959596	0.00422749	0.000642879	0.011119	0.00774809	0.00490375	0.000736422	0.00288028	0.00140597	0.0116208	0.0070966	0.00888343	0.00461612	0.00159386	0.000351519	0.0159764	0.00655823	0.046517	0.0173753	0.0359955	0.00482871	0.0325785	0.00120672	0.0157436	0.00348462	0.0258701	0.00225056	0.0670939	0.0272094	0.00872821	0.00426171	0.035465	0.0167007	0.00500278	0.00199115	0.00733597	0.00460169	0.0132606	0.00630843	0.0344106
ID_37	0.00433724	0.00172073	0.00292348	0.000619228	0.00351417	0.000600657	0.00660168	0.00838901	0.00322387	0.00124872	0.00416931	0.00117733	0.00171872	0.00174607	0.00356228	0.000939228	0.00728076	0.000455205	0.0103666	0.00215954	0.00250107	0.00201196	0.00826565	0.00327591	0.00786463	0.00432839	0.000893385	0.000381883	0.000389398	1.18724e-05	0.000947213	0.000706995	0.000768956	0.00025753	0.00289664	0.00108882	0.00528791	0.00032537	0.00373898	0.00029652	0.00125821	0.000527864	0.00364736	0.00158872	0.00587939	0.00277413	0.0077019	0.00156354	0.00331385
ID_38	0.00178671	0.000240099	0.00131958	0.000357272	0.0015419	0.00015655	0.0092582	0.0106391	0.0158134	0.00523758	0.0127551	0.00123607	0.0131868	0.00574602	0.0105605	0.00515756	0.022342	0.00823765	0.177427	0.0917131	0.0192176	0.0150544	0.0172535	0.00780403	0.0118245	0.0024595	0.00523488	0.00114941	0.00388682	0.00127499	0.01276	0.0101588	0.024477	0.0114903	0.0549901	0.0307561	0.112692	0.029404	0.0348011	0.00650338	0.0170541	0.00712067	0.0223493	0.0207363	0.011316	0.00666497	0.0158888	0.0062134	0.0198044
ID_39	0.000711186	0.000168393	0.00074897	3.59037e-05	0.00101708	0.000270167	0.00411227	0.00158996	0.00196069	0.000846461	0.00263313	0.00034943	0.00233399	0.000618795	0.00210694	0.000539275	0.0085859	0.00283397	0.00517338	0.0032504	0.00443941	0.00316077	0.0124317	0.00311672	0.00178204	0.000637114	0.00081067	0.000312137	0.00412026	0.00197492	0.00809056	0.00261212	0.0179487	0.00995084	0.0143389	0.00239339	0.00657978	0.00141217	0.00781306	0.00406725	0.00254347	0.00082568	0.0143367	0.00569579	0.0123172	0.00897789	0.00648267	0.00192651	0.00770612
ID_40	0.013671	0.00317344	0.0110356	0.000852546	0.012441	0.00206819	0.00335336	0.00433526	0.0169967	0.0125876	0.00950647	0.00173896	0.00647837	0.00577787	0.0171237	0.00377602	0.00705673	0.0056736	0.00759265	0.00393661	0.00412703	0.00473401	0.00367562	0.00195328	0.00582461	0.00127925	0.00314193	0.00140681	0.00565205	0.00197114	0.00516316	0.00606387	0.00867052	0.00223914	0.0158363	0.00598987	0.0147703	0.00345724	0.00593158	0.00185389	0.00943134	0.00676557	0.0124997	0.00469236	0.00185187	0.000965262	0.00224933	0.00128165	0.0166237
ID_41	0.00230021	0.000392847	0.00182524	0.000528056	0.00245409	0.000704103	0.029966	0.0075624	0.0105505	0.00253874	0.011564	0.000643404	0.0203946	0.00763374	0.00835921	0.00182114	0.0151669	0.00929822	0.0162886	0.00262267	0.0537586	0.0311064	0.0153625	0.00250669	0.0168794	0.00349747	0.00486662	0.00200395	0.00240796	0.00103776	0.0024251	0.00161585	0.00141501	0.000643073	0.00251301	0.000175845	0.00159671	0.000531424	0.00162345	0.00103133	0.00044185	0.000165117	0.00193575	0.00139834	0.00040412	0.000231457	0.00027744	0.000146051	0.00106391
ID_42	0.0321321	0.00892433	0.0234781	0.00120823	0.0210462	0.00989257	0.00143646	0.000442858	0.00125618	0.000580624	0.00123338	0.000112268	0.00131383	0.000543773	0.00107337	0.000653383	0.00221077	0.000518269	0.000807197	0.000114332	0.000941539	0.000207674	0.000607128	8.81856e-05	0.00156388	0.000190693	0.0059775	0.00312572	0.0099606	0.00659771	0.00419244	0.00298548	0.0134453	0.00197551	0.00640338	0.00589071	0.00585308	0.00190858	0.00439862	0.00221129	0.00216115	0.000731157	0.0132034	0.0100006	0.0102845	0.00786547	0.0410462	0.0101866	0.0443273
ID_43	0.000160905	0.000118958	0.000124849	9.14218e-05	4.54411e-05	6.42634e-05	0.0145642	0.0204722	0.00874574	0.0112453	0.000160825	9.54023e-05	0.00392811	0.00544535	0.000259679	0.000141699	0.000156097	5.33781e-05	0.00159771	0.00135162	0.000104715	2.6344e-05	7.7107e-05	3.14418e-05	0.0279318	0.0379375	0.00346354	0.002303	0.0447188	0.0486893	0.00623302	0.00643857	0.00292492	0.00225895	8.45548e-05	3.85919e-05	0.000229094	0.000162344	0.0183601	0.0154587	0.000682453	0.000701928	0.00016326	0.000126706	0.00171382	0.00196892	0.00634552	0.00462014	0.00568145
ID_44	1.66351e-05	2.35255e-05	2.78823e-05	3.94316e-05	5.18162e-05	7.32791e-05	0.000117765	0.000166545	0.00018369	8.46157e-05	0	0	0.000312012	0.000117676	1.31136e-05	1.85454e-05	2.51524e-05	1.91162e-05	0.000126523	7.16455e-05	0.000238442	0.000120075	9.34975e-05	2.37078e-05	0.000207776	0.000104292	3.24783e-05	2.45458e-05	5.39158e-05	3.81601e-05	6.58374e-05	5.181e-05	6.3922e-05	4.55803e-05	6.99069e-05	2.18854e-05	0.000395686	0.000106299	0.000227065	0.000112931	0.000509623	0.000200496	0.000460833	0.000172603	8.55652e-05	6.05842e-05	0.000419262	0.000104424	0.000476424
ID_45	0.000172123	0.000115564	0.000157442	0.000185726	0.000152679	0.000113686	0.000360717	0.000159357	0.000507812	0.000243233	0.000373392	0.000156519	0.00036529	0.000114527	0.000469762	5.80305e-05	0.000702217	0.000132052	0.00038107	0.000223699	0.000369225	0.00010849	0.000780407	0.000350479	0.00041842	0.000174923	0.00113245	0.000168713	0.000717019	0.000117986	0.00151274	0.000704872	0.000720886	0.00039625	0.000743193	0.00027187	0.00245919	0.000227375	0.00186545	0.00034406	0.00254725	0.000610817	0.00194204	0.000250868	0.000808793	0.00033104	0.0009164	0.000242708	0.000589301
ID_46	0.00657246	0.00044837	0.00618192	0.0001027	0.00561299	0.00242357	0.000512999	8.03192e-05	0.00265983	0.00167266	0.00194069	0.000435453	0.00247762	0.00155839	0.00192528	0.000729596	0.000415068	0.000123712	0.00168635	0.000274185	0.00184823	0.00102638	0.00184054	0.00110812	0.00372761	0.00113036	0.00163648	0.00140517	0.00169427	0.000678332	0.00250925	0.00111028	0.00267434	0.00125387	0.00241727	0.000686122	0.000282076	3.30795e-05	0.000316369	0.0001733	0.000644078	0.000617473	0.00191881	0.000748403	0.00162719	0.00121227	0.000699688	0.000192216	0.000687793
ID_47	0.0111534	0.00149335	0.0085195	0.00156115	0.00918472	0.00113696	0.0304431	0.00608588	0.0202352	0.0105912	0.0283946	0.00341973	0.0284812	0.00974893	0.014635	0.00292168	0.0194329	0.00142576	0.0198635	0.00243835	0.0225272	0.000638115	0.00762826	5.90625e-05	0.0259184	0.0139126	0.015214	0.0058401	0.0178854	0.00999147	0.0138855	0.00919429	0.0106466	0.00227497	0.00395131	0.000677332	0.0058167	0.00170276	0.00216138	0.00052237	0.00590754	0.00133479	0.00295076	0.00022412	0.00310101	0.00131992	0.00387821	0.00181981	0.00464347
ID_48	0	0	0	0	0	0	0	0	0	0	0	0	0	0	0	0	0	0	0	0	0	0	0	0	0	0	0	0	0	0	0	0	0	0	0	0	0.000202156	7.39819e-05	0.000238851	7.21473e-05	0.000694428	0.000249639	0.000127418	9.73884e-05	0.000123972	6.93069e-06	0.000148739	5.69423e-05	0.00019583
ID_49	0.00151595	0.000112883	0.00153552	3.83319e-05	0.00155549	0.000507206	0.00625634	0.00211785	0.00421793	0.00151484	0.00506612	0.00136007	0.00589514	0.00253841	0.00367754	0.000688619	0.00162022	0.000504339	0.00208631	0.00149741	0.00185451	0.000164799	0.0014069	0.000756608	0.0045161	0.00024163	0.0010615	0.000114895	0.0017901	0.000261334	0.00287612	0.00134724	0.00244649	0.000329742	0.00135054	0.000493255	0.000428614	0.000317015	0.00126892	0.000595726	0.00139405	0.000753243	0.00181253	0.000671292	0.00149316	0.00057157	0.000416824	0.00051719	0.000721379
ID_50	0.00219478	0.000505691	0.00172933	0.000339264	0.0016864	0.000476609	0.00519605	0.00369097	0.0209636	0.00271305	0.0199374	0.00549609	0.0137663	0.00145979	0.0123842	0.00134781	0.00745117	0.0055408	0.00744581	0.00205737	0.00626644	0.000668711	0.0141337	0.00323359	0.00564064	0.000454358	0.00453891	0.00151634	0.00268219	0.000464516	0.00783307	0.00346194	0.00513179	0.000776495	0.00895425	0.00081519	0.00236562	0.00101604	0.00138346	0.000423899	0.00014966	2.23375e-05	0.000978856	0.000449589	0.00171589	0.000878024	0.000945434	0.000389284	0.00164944
ID_51	0.0430691	0.00733489	0.0381949	0.00460601	0.0399334	0.00238116	0.000388888	0.000443687	0.000383969	0.000101597	0.000287584	7.69309e-05	0.000242739	9.14872e-05	0.000104908	0.000148363	0.00142128	0.000830573	0.00124831	0.000577319	0.00074326	0.000799578	0.00190254	0.00226136	0.000294622	0.000189353	5.95676e-05	1.76218e-05	0.00167748	0.00120525	5.42529e-05	3.54575e-05	0.000178389	0.000228414	0.000106658	1.39373e-05	5.80885e-05	3.48766e-05	2.38087e-05	3.36705e-05	6.50052e-05	3.07916e-05	0.0184542	0.0130007	4.40567e-05	6.23056e-05	2.54608e-05	3.60071e-05	0.000696133
ID_52	0.00614174	0.000923371	0.005017	0.000590847	0.0056824	0.000364411	0.00316795	0.00136238	0.00151583	0.000862317	0.0018018	0.000338083	0.00251418	0.00194174	0.002331	0.000309425	0.000843957	0.000189363	0.00114513	7.54874e-05	0.00208116	0.000943248	0.00148518	0.000680039	0.0020825	0.000595778	0.0167951	0.00943451	0.00462659	0.0024715	0.0182474	0.00803805	0.0111682	0.00506176	0.00624468	0.00751808	0.0150056	0.00673819	0.00432689	0.00168622	0.0169766	0.00672463	0.0357322	0.00796223	0.00559223	0.00190695	0.00117276	0.000144375	0.00158313
ID_53	0.000487602	0.000388727	0.000329877	0.000239927	0.000243572	9.21521e-05	0.00810018	0.0025866	0.0075704	0.00161052	0.008608	0.00131679	0.00845401	0.00127856	0.00665345	0.00141963	0.0109272	0.00565628	0.00635533	0.0010951	0.00523511	0.000852295	0.0119907	0.00567861	0.00980445	0.00485899	0.0088878	0.00128401	0.00472995	0.000374584	0.015521	0.00244652	0.00238887	0.00047301	0.00215014	0.000619903	0.00354834	0.0010088	0.00249367	0.00145058	0.00200845	0.000889887	0.00214118	0.000549128	0.0021004	0.00118298	0.00045349	0.000354736	0.000310517
ID_54	0.0163672	0.0025568	0.0144686	0.000306241	0.0171677	0.00224898	0.0115469	0.0102182	0.0093627	0.00217725	0.0150347	0.00360635	0.013315	0.00360205	0.00492273	0.000610122	0.0130071	0.00257461	0.00717301	0.00143749	0.00663294	0.00268231	0.00561535	0.000786901	0.00869022	0.00268444	0.0149431	0.00264466	0.0244425	0.00819627	0.018557	0.00829308	0.0242517	0.00441887	0.0104997	0.00527369	0.00929128	0.000421202	0.00681615	0.000432913	0.00857122	0.00162184	0.0111235	0.00386082	0.00812937	0.00430418	0.0109289	0.00211933	0.0218373
ID_55	0.0482629	0.00809645	0.042984	0.00247068	0.0493913	0.00191705	0.00638111	0.00662587	0.00917903	0.00208863	0.0120987	0.00256753	0.00645724	0.00404031	0.0125772	0.00533993	0.0180328	0.00506018	0.0110385	0.0014582	0.00480514	0.00405899	0.0182762	0.00291127	0.00973528	0.0028487	0.00759542	0.00242412	0.00314072	0.00163163	0.0109819	0.0104803	0.00360276	0.00022065	0.00901967	0.00229474	0.0178855	0.004268	0.00692845	0.00121188	0.00430682	0.000460896	0.011031	0.00939127	0.00409193	0.00229509	0.00547644	0.00172968	0.00503654
ID_56	0	0	0	0	0	0	0	0	2.18036e-05	3.08349e-05	0	0	2.58879e-05	1.83464e-05	0	0	5.42985e-05	4.79292e-05	1.87868e-05	2.65685e-05	0.00138725	0.00196187	0	0	5.15917e-05	1.51259e-05	2.54036e-05	3.59261e-05	1.48485e-05	2.09989e-05	1.08169e-05	1.52974e-05	0	0	3.20763e-05	2.5761e-05	0.00787707	0.00706751	0.00515562	0.00303518	0.00528659	0.00337246	0.000860707	0.000352942	0.00022719	3.17441e-05	0.000826635	0.00055891	0.000748094
ID_57	0.00209192	0.00016086	0.00189756	0.000965257	0.00182678	0.000658951	0.00465717	0.00258807	0.00260203	0.00184321	0.00214757	0.0013899	0.00442456	0.00309806	0.00186969	0.000120192	0.00115728	0.000120029	0.00386525	0.00103042	0.00402525	0.00255231	0.00165656	0.000878937	0.00801103	0.00254737	0.00225786	0.00026007	0.00214327	0.000256987	0.00260198	0.0016262	0.00148902	0.000427893	0.00103115	0.000617879	0.00135392	0.000461172	0.00159386	0.000328437	0.00425966	0.000707652	0.00131047	0.000533219	0.00111575	6.23762e-05	0.000759608	0.00019536	0.000973987
ID_58	0.0189417	0.00428966	0.0145014	0.00175723	0.0147578	0.00305433	0.000565176	0.000499406	0.00162581	0.000836654	0.0021219	0.000480555	0.00419261	0.00136647	0.00211537	0.000709979	0.00174198	0.0006668	0.00199393	0.000388847	0.00108142	0.00036828	0.00193841	0.000345525	0.00270297	0.000319632	0.00173744	0.000675187	0.0031509	0.000782685	0.00166214	0.000734202	0.00604643	0.000441481	0.00698062	0.000657659	0.00732474	0.00121105	0.0054398	0.000846688	0.00745738	0.0010207	0.00429591	0.001105	0.00365983	0.00226	0.00887606	0.0015328	0.00751435
ID_59	0.000256442	0.000200975	0.000282138	0.000149064	0.00038627	6.87431e-05	0.000114122	0.000105305	6.6579e-05	4.83861e-05	7.49584e-05	1.9387e-06	5.95253e-05	5.97593e-05	2.62271e-05	3.70907e-05	6.06144e-05	2.5917e-05	7.75553e-05	2.7192e-05	6.09721e-05	5.7864e-05	9.46205e-05	9.94012e-05	3.47572e-05	4.91541e-05	3.89482e-05	3.11358e-05	5.49473e-05	1.69459e-05	1.15845e-05	1.6383e-05	7.7257e-05	5.89712e-05	4.36677e-05	4.1503e-05	0.000450878	0.000145474	0.000203138	6.64046e-05	0.00059084	4.66324e-05	0.000555763	3.27404e-05	0.000327859	4.63378e-05	0.00038331	0.00016514	0.00051363
ID_60	0.00104594	0.000208617	0.000740944	0.000218895	0.000961109	0.000298577	0.00279288	8.73775e-05	0.00319826	0.000344054	0.00308003	0.000293135	0.00300201	0.00114796	0.00330223	0.000457017	0.0027673	0.00043971	0.00222331	7.60181e-05	0.0024935	0.000223967	0.00258372	6.53781e-05	0.00410505	0.000687575	0.017562	0.00239474	0.0183556	0.00618596	0.00816488	0.00360198	0.00813306	0.00284153	0.0103994	0.00237162	0.00667879	0.00161797	0.00815518	0.00118342	0.0104558	0.00275039	0.0109814	0.00269396	0.00674647	0.00342651	0.0138581	0.00154521	0.0103413
ID_61	0.0136759	0.00231146	0.0111458	0.000526889	0.0107607	0.00087438	0.0058865	0.00102166	0.00525653	0.000958746	0.00503883	0.00135476	0.00641747	0.00275759	0.00349375	0.000368081	0.00560169	0.000305558	0.00656504	0.00139153	0.00705154	0.00262723	0.00374189	0.000216484	0.00329594	0.000350928	0.000673845	0.000403569	0.00242279	0.00040336	0.0013727	0.000817857	0.00102608	0.000296861	0.00139898	0.000103119	0.000922884	0.000361343	0.0016666	0.000697113	0.0042185	0.000812504	0.00224145	0.000579793	0.00105914	0.000185729	0.00201924	0.000312804	0.000908413
ID_62	0.000253364	0.000120411	0.000218347	8.22116e-05	0.000285407	0.00012818	0.0023583	0.00113667	0.00319226	0.000626319	0.00315233	0.000921466	0.0119946	0.00581417	0.000987077	0.000277954	0.00217635	0.00159989	0.013295	0.00829021	0.0215048	0.0142253	0.0034758	0.00071187	0.0147844	0.00859309	0.0017488	0.00187156	0.00443341	0.00246279	0.00180624	0.000449452	0.00131623	0.000552328	0.00330192	0.00278692	0.00128244	0.00105933	0.00133477	0.00103182	0.00273069	0.000792264	0.00199174	0.00024354	0.000866698	0.000354208	0.000787372	0.000489325	0.00379717
ID_63	0.000754123	0.000133834	0.000950223	0.000519494	0.000822972	0.000223257	0.0016657	0.000214407	0.00139251	0.000189025	0.00194079	0.000244872	0.00188857	0.000451376	0.00164077	0.000122568	0.00182528	0.000281098	0.00156628	0.000340035	0.00228413	0.00093454	0.00149427	0.000214649	0.00132099	0.000479499	0.00155662	0.000368873	0.00187004	0.000186054	0.00177852	0.000305236	0.00143918	0.000223995	0.00156025	0.000289113	0.00214426	0.000141807	0.000885769	0.000222648	0.00150737	0.00052268	0.00158218	0.00015971	0.00189718	0.00101994	0.00170287	0.000341772	0.00146492
ID_64	0.00144399	0.000515856	0.00108566	0.000215676	0.00111116	0.000393435	0.00164711	0.00033882	0.00100333	8.79483e-05	0.00118309	0.000497819	0.00151435	0.000776344	0.00107495	0.00045647	0.00246822	0.000563576	0.00291318	0.00162686	0.000959922	0.000303858	0.00317044	0.00172855	0.00370332	0.000489294	0.00464613	0.00111508	0.00685607	0.00108743	0.00333221	0.0016361	0.00267086	0.000450674	0.00146038	0.000567891	0.00710068	0.00200098	0.0066409	0.00140563	0.00410044	0.00119702	0.0047746	0.00117159	0.00311293	0.00117643	0.00792133	0.00349304	0.00647676
ID_65	0.0113352	0.00552579	0.0164327	0.0025574	0.0122366	0.00231063	0.00799628	0.00351462	0.00629907	0.00116766	0.00623189	0.00217789	0.0041019	0.00101053	0.00244419	0.000982474	0.00524038	0.00087357	0.00395561	0.00105881	0.00995009	0.00582054	0.00840909	0.00291523	0.00290831	0.000443007	0.00193896	0.00136951	0.00345044	0.00175667	0.00272847	0.0022418	0.00322293	0.00243694	0.000841247	0.000314043	0.000643494	0.000450215	0.00239264	0.00123828	0.00464574	0.00247598	0.00541811	0.00297582	0.0162394	0.0125996	0.00103058	0.000101557	0.00122912
ID_66	0.00379072	0.00122033	0.00344048	0.00060954	0.00322831	0.000420815	0.00376436	0.00208671	0.00353069	0.00194419	0.00324512	0.000632918	0.00266913	0.000922663	0.00648294	0.00274359	0.00368361	0.00219699	0.00301535	0.00132733	0.00476196	0.00267267	0.00503789	0.00202614	0.00291547	0.00076119	0.00154052	0.000458074	0.0035765	0.00120894	0.0028828	0.00103342	0.00462689	0.00148012	0.00544886	0.00337946	0.00358575	0.00175015	0.000872991	0.000217992	0.00158598	0.000923547	0.00257542	0.00153813	0.00314186	0.00267165	0.00234406	0.00123341	0.00471863
ID_67	0.000198628	6.9908e-05	0.00024471	7.05427e-05	0.000212673	5.04006e-05	0.000383232	2.95239e-05	0.000393633	0.000415596	0.00035161	0.000144886	0.00301302	0.00379533	0.000635412	0.000307104	0.00248238	0.00321481	0.000679832	0.000316633	0.000815946	0.000592173	0.000229719	0.000165769	0.000519697	0.00016283	0.00154509	0.000813832	0.00432706	0.00267296	0.00504143	0.00456261	0.0027662	0.00180957	0.00323825	0.0018094	0.00207171	0.000583299	0.00373021	0.000542662	0.00235237	0.00119231	0.00273381	0.00145194	0.00443306	0.00330766	0.00121125	0.000224313	0.000582315
ID_68	0.0023956	0.000475493	0.00136932	0.000279485	0.00157322	0.000454995	0.00194058	0.000596071	0.00198279	0.000577185	0.00225016	0.000628592	0.00174351	0.000296913	0.00157499	0.000281086	0.00321337	0.00108104	0.00193845	0.000370884	0.00283761	0.00129511	0.00109736	0.000264207	0.00202263	0.000230349	0.00708615	0.0063753	0.00604162	0.00179507	0.00546804	0.00179874	0.0160676	0.0110613	0.00366569	0.00215094	0.00138936	0.000469135	0.000694133	0.000304824	0.00257101	0.000593958	0.00140069	0.000237493	0.0106408	0.005727	0.010807	0.00513292	0.0169789
ID_69	0.000493786	7.88281e-05	0.000514111	2.86066e-05	0.000443077	3.89074e-05	0.00022074	0.000150735	0.000388503	0.000177573	0.000508341	0.000146808	0.000260934	4.24349e-05	0.000373349	0.00010456	0.000284773	5.49634e-05	0.000318262	0.000107537	0.000549642	0.000153702	0.000338269	2.53132e-05	0.000267629	0.000124898	0.000125367	4.16229e-05	0.000180011	4.95567e-05	0.000189381	3.91322e-05	0.000207958	8.29161e-05	0.0002896	7.41202e-05	0.000545818	0.00014714	0.000257376	2.73268e-05	0.00141213	0.000567704	0.00106233	0.000252929	0.000236644	0.000188359	0.000552347	0.000322519	0.000744073
ID_70	0.0216276	0.012941	0.0310636	0.00837982	0.0252518	0.00530243	0.000817262	0.000280665	0.000505126	6.94302e-05	0.000735922	0.000137502	0.00051762	0.000126156	0.000435159	0.000222883	0.00108678	0.000456332	0.000718934	0.000347488	0.000993224	8.78699e-05	0.000935315	0.00019971	0.000755623	0.000192111	0.000151613	2.71172e-05	0.000217569	0.000182002	0.000231426	0.00011405	0.000108734	8.10103e-05	0.000154379	5.96996e-05	0	0	2.92106e-05	2.07089e-05	1.20572e-05	1.70515e-05	0	0	0.000106319	7.84161e-05	0	0	0
ID_71	9.28428e-06	1.31299e-05	0	0	0	0	0	0	0	0	0	0	0	0	0	0	0	0	0	0	0	0	0	0	0	0	0	0	0	0	0	0	0	0	0	0	0.000168977	8.38251e-05	0.000242279	0.000120997	0.000405828	9.84372e-05	0.000129134	5.69365e-05	6.4811e-05	5.39884e-05	3.49113e-05	4.93721e-05	4.23819e-05
ID_72	0.00060385	0.000209964	0.000415778	0.000217892	0.000472591	0.000224719	0.000343002	7.88315e-05	0.000318558	2.55609e-05	0.000474286	3.06729e-05	0.000497533	0.000182927	0.000624741	2.62375e-05	0.000538617	6.08273e-05	0.000310092	0.000178158	0.000738706	0.000180598	0.000770376	0.000232563	0.000165719	3.03036e-05	0.000333083	0.000198511	0.000126095	3.58985e-05	0.000229147	4.60516e-05	0.000239932	4.33356e-05	0.000185916	4.22299e-05	0.00125695	0.000519815	0.000333741	0.00020913	0.00131548	0.000334065	0.00114603	0.000519617	0.000998982	0.000939485	0.000538609	0.000378889	0.00070946
ID_73	0.00021333	2.27556e-05	0.000137739	0.000103905	0.000139521	0.000100566	0.00409787	0.00481971	0.00845936	0.00730103	0.000547961	0.000449159	0.00974148	0.00677819	0.000133192	3.85295e-05	0.000190424	3.87805e-05	0.0128256	0.00386438	0.00613907	0.0042037	0.000262285	0.000116166	0.0149335	0.00793546	0.000138069	2.8397e-05	0.000123712	2.80097e-05	0.00305062	0.0040121	0.000176951	6.0144e-05	8.09587e-05	3.71029e-05	1.18569e-05	1.67682e-05	1.39962e-05	1.97936e-05	1.39034e-05	1.96623e-05	0.00011838	0.000112803	0	0	0	0	0
ID_74	0.000463971	0.000193289	0.000287278	0.000190001	0.000402626	0.000109259	0.00201861	0.00216812	0.00381211	0.0026858	0.00600818	0.0035391	0.00202417	0.00172455	0.000922223	0.000193334	0.00510732	0.00259131	0.000747548	0.000215232	0.000834141	0.000885241	0.00101043	0.000849472	0.00178336	0.000746752	0.00745176	0.00338574	0.0027765	0.00229065	0.00149185	0.00179048	0.00180593	0.000665074	0.00171923	0.000214956	0.00339729	0.00157179	0.00195889	0.00044924	0.00207739	0.00134427	0.00248063	0.000900665	0.00140059	0.000824179	0.00500892	0.00267913	0.0101393
ID_75	0.000964319	0.000246157	0.000847609	7.86881e-05	0.0011311	0.000164187	0.00971707	0.00270255	0.00898774	0.0099862	0.0021845	0.00075896	0.00915982	0.00487577	0.00283454	0.000611063	0.00483482	0.000572659	0.00997321	0.00143788	0.0042068	0.00159197	0.00414266	0.000783526	0.00500358	0.00220824	0.00219752	0.0015506	0.00138418	0.000172013	0.00112077	0.000373279	0.000980329	0.000348401	0.00266455	0.00064582	0.00122041	0.000180105	0.000365733	0.000145709	0.00113614	0.00108733	0.000606448	0.00020976	0.00012652	0.000108212	0.000790588	0.000197995	0.000483167
ID_76	0.0328754	0.00719175	0.0254767	0.00306338	0.0252836	0.00212152	0.000216877	0.000159738	0.000222221	0.000153665	0.000100858	3.85668e-05	0.000122746	6.11556e-05	0.000137677	2.80284e-05	0.000280779	6.38933e-05	0.000170609	3.88904e-05	0.000202641	9.47741e-05	0.000245895	7.29055e-05	0.000166682	6.13231e-05	0.000106433	5.15288e-05	5.93939e-05	8.39956e-05	6.43021e-05	2.93419e-05	7.5846e-05	2.894e-05	5.83156e-05	2.62953e-05	0	0	0	0	0	0	0	0	0	0	0	0	0
ID_77	0.000322808	0.000106568	0.000359861	8.52075e-05	0.000207683	1.96374e-05	0.00734649	0.00740392	0.00435758	0.00515306	0.000434759	0.000115491	0.000663501	0.000103308	0.000737267	0.000550122	0.00760088	0.00308053	0.00359432	0.00152859	0.00411864	0.0051813	0.00224154	0.00158654	0.000480965	0.000103589	0.00343927	0.00147657	0.00302407	0.00129102	0.00532908	0.00329641	0.000575229	9.51108e-05	0.00901852	0.00689265	0.0055733	0.00250073	0.00152574	0.000432142	0.00504305	0.00163723	0.0116759	0.0100105	0.00219948	0.000781689	0.00395106	0.00196249	0.00649742
ID_78	0.0113161	0.00212013	0.00941496	0.000383356	0.0114194	0.00128219	0.00322349	0.000442266	0.00519654	0.000943215	0.00409425	0.000696764	0.00412629	0.000472138	0.0060286	0.00149779	0.00381467	0.00190501	0.00401196	0.000740917	0.00513314	0.000393115	0.00281924	0.000328686	0.00678429	0.000744093	0.00523443	0.00224488	0.00529731	0.00308917	0.00424946	0.00155371	0.00754594	0.00155196	0.00527022	0.00123933	0.00657021	0.00263083	0.00324078	0.000777044	0.00697239	0.00167658	0.00877002	0.00653562	0.00303764	0.00153583	0.00368332	0.001802	0.00558151
ID_79	0.0010477	0.000197393	0.000916264	0.000241977	0.000786127	0.000446046	0.000979119	0.000111243	0.00140057	0.000816861	0.000312072	0.000135131	0.00226687	0.00117126	0.00172397	0.000439843	0.000570788	0.000319187	0.00146649	0.000654524	0.00690564	0.00420529	0.00845079	0.0074153	0.0037538	0.00230914	9.20459e-05	1.89313e-05	0.000166194	3.06497e-05	0.000203316	0.000202381	0.000134055	5.15535e-05	0.000305272	0.000318141	3.84668e-05	3.26546e-05	1.52144e-05	2.15165e-05	5.58211e-05	2.39791e-05	5.80802e-05	4.26734e-05	0	0	2.54608e-05	3.60071e-05	6.77855e-05
ID_80	0.000162664	0.000101889	0.000356086	0.000175885	0.000344446	0.000280914	5.76683e-05	4.08047e-05	0.00047385	0.000457464	0.000595596	0.000256369	0.000162775	0.000202352	0.00089768	0.000579733	8.00451e-05	1.42791e-05	7.0978e-05	5.69705e-05	1.47304e-05	2.08319e-05	0.000322913	0.000416335	0.000139535	7.43056e-05	0.000482039	0.000326176	0.00549566	0.00205249	0.00380276	0.00174767	0.00781106	0.00223651	0.00156366	0.000876456	0.000970837	0.000544064	0.000215387	3.46982e-05	0.00907552	0.00451926	0.00376696	0.00296232	0.00107779	0.00111506	0.00028952	0.000338099	0.00715622
ID_81	0.00116854	0.00044775	0.000888535	0.000291697	0.00136418	0.000743324	0.000618347	0.000592738	0.00108473	0.000470044	0.000796018	0.000434241	0.00092627	0.000555186	0.000377581	0.000172796	0.00151471	0.00143681	0.00155309	0.000468529	0.00311152	0.00177013	0.000580656	0.000227337	0.00102866	0.000743875	0.000518587	7.30387e-05	0.00249565	0.00108797	0.000752439	0.000220414	0.00270755	0.0021801	0.000952068	0.000625808	0.00189789	0.00236378	0.000438495	0.000145559	0.00431615	0.000882215	0.00180369	0.00106911	0.00200106	0.000440874	0.000432739	9.07708e-05	0.00196342
ID_82	9.28428e-06	1.31299e-05	4.5913e-05	3.4635e-05	2.27206e-05	3.21317e-05	7.83902e-05	1.15683e-05	2.87282e-05	4.06278e-05	5.04234e-05	3.56945e-05	4.48309e-05	3.85729e-05	2.40068e-05	1.71918e-05	2.51524e-05	1.91162e-05	4.65267e-05	8.01587e-06	3.78512e-05	2.86698e-05	3.66293e-05	2.60201e-05	3.53987e-05	2.91683e-05	2.70893e-05	3.831e-05	5.52677e-05	7.81603e-05	4.84485e-05	2.1017e-05	3.57718e-05	5.05889e-05	6.8745e-05	5.14801e-05	0.000655839	6.09661e-05	0.000375201	0.000175534	0.000721058	0.000147843	0.000565659	8.13e-05	0.000399576	0.000283181	0.000309461	7.30443e-05	0.000429523
ID_83	0.00223443	0.000527231	0.00145443	0.000425833	0.00159328	0.00040944	0.00231804	0.000147415	0.00235044	0.000458576	0.00249418	0.000513196	0.00247382	0.000849053	0.00240385	0.000738091	0.00367165	0.000706242	0.00267207	0.000386612	0.00248877	0.000938074	0.00384617	0.000520707	0.00212643	0.000387266	0.00268683	0.0012107	0.00476407	0.00125522	0.00452028	0.00208334	0.00186991	0.00128055	0.00121793	0.000886412	0.00585482	0.00176129	0.00049159	0.000271079	0.000220204	6.01871e-05	0.00119763	0.000613317	0.00663195	0.00350488	0.00630428	0.00420969	0.00297909
ID_84	3.52036e-05	2.50051e-05	2.78823e-05	3.94316e-05	0.000110426	5.31522e-05	2.82271e-05	3.99191e-05	8.83826e-05	1.97151e-05	4.90701e-05	6.93956e-05	4.05823e-05	3.08266e-05	7.20204e-05	5.15754e-05	2.9146e-05	4.12187e-05	5.55123e-05	4.49834e-05	6.05236e-05	4.62332e-05	0.000113736	7.37425e-06	2.77788e-05	2.0437e-05	3.95531e-05	5.59365e-05	1.38169e-05	1.95401e-05	3.3986e-05	2.8397e-05	4.96117e-05	1.39582e-05	4.19662e-05	3.92226e-05	0.000332484	0.000116885	0.000168988	7.45528e-05	0.000215485	2.90459e-05	0.000341867	0.000179621	0.000203887	5.12776e-05	0.000346906	0.000101006	0.000333995
ID_85	0.00374965	0.000687233	0.00323226	0.000143952	0.00370003	0.000805899	0.00547606	0.00266373	0.00412309	0.00164246	0.00464931	0.00336459	0.00429408	0.00180913	0.00322527	0.00119339	0.0144112	0.0134218	0.00451925	0.00134789	0.00433433	0.00336292	0.00147101	0.000318468	0.00358363	0.00177332	0.000586073	7.40368e-05	0.00360296	0.00106098	0.00155865	0.000638086	0.00273491	0.000801376	0.00469576	0.00274465	0.000857463	0.000349552	0.00226006	0.00181336	0.00374747	0.00220156	0.00187335	0.000261093	0.00136019	0.000567743	0.000489085	7.73538e-05	0.000768577
ID_86	0.00223829	0.000446463	0.00203041	0.000493988	0.00320554	0.00146781	0.00422755	0.00195148	0.00136467	0.000395909	0.00155232	0.000435364	0.00115034	0.000253971	0.00135562	0.000816977	0.000139525	3.6031e-05	0.000518954	0.000273568	0.000555982	0.000158749	9.64374e-05	3.15734e-05	0.000842419	9.42289e-05	0.00447151	0.00131874	0.00230219	0.00109483	0.00113957	0.000697926	0.00130113	0.000639068	0.000596574	0.000185323	0.000362081	9.95859e-05	5.42376e-05	3.91995e-05	6.68514e-05	1.62415e-05	0.000411709	0.000136434	0.000362612	0.000283248	0.000538513	0.00019657	0.000139064
ID_87	0.000202873	0.000166989	0.00013622	4.04495e-05	0.000147689	8.85697e-05	0.00256486	0.00126242	0.00212319	0.00181026	0.00499355	0.00242562	0.00120405	0.000827423	0.00329578	0.00182893	0.00446472	0.00295658	0.00163272	0.000910349	0.00223404	0.00172165	0.00444634	0.00277428	0.00346174	0.000306557	0.000278631	0.000153387	0.000244328	0.000143217	0.000263756	8.25444e-05	9.30396e-05	7.08612e-05	0.000391225	0.000286028	0.000199939	0.000264164	0.000179859	0.000229569	0.000240371	0.000188671	3.64232e-05	3.57278e-05	0	0	5.09217e-05	7.20141e-05	0.000106918
ID_88	0.000184891	0.00012265	0.000187426	9.6653e-05	0.000256312	5.25233e-05	2.0722e-05	2.93053e-05	2.87282e-05	4.06278e-05	0	0	0	0	7.87257e-05	6.4243e-05	0.000114913	3.88757e-05	3.09962e-05	4.38353e-05	0	0	5.68682e-05	3.68713e-06	1.6193e-05	2.29004e-05	0.0001908	9.57143e-05	7.88457e-05	0.000111505	2.31691e-05	3.2766e-05	0.000199353	0.000195556	1.5727e-05	2.22413e-05	0.000868286	0.000523539	0.000107786	0.000106015	2.88336e-05	2.04272e-05	0.00103539	0.00131141	0.000164927	0.000117439	0.00343615	0.00265315	0.00533976
ID_89	0	0	0	0	0	0	0	0	2.18036e-05	3.08349e-05	0.000113132	5.40888e-05	0	0	2.40068e-05	1.71918e-05	0	0	2.44837e-05	3.46252e-05	0	0	0	0	2.80995e-05	2.05512e-05	1.35446e-05	1.9155e-05	2.62819e-05	3.71682e-05	7.57182e-05	0.000107082	0	0	0	0	0.000295724	3.98791e-05	0.000409242	0.000216634	0.000331638	0.000131128	0.000416738	0.000291843	0.00104743	0.0006063	0.00532217	0.00628935	0.000272825
ID_90	9.28428e-06	1.31299e-05	1.80307e-05	2.54992e-05	2.59081e-05	3.66396e-05	0.000236385	8.29631e-05	0.00044664	0.000201437	7.35934e-05	6.00984e-05	0.000293565	0.00026663	5.89068e-05	4.23965e-05	2.00248e-05	2.83194e-05	0.000316701	9.45472e-05	0.000163636	0.000104501	0.000171513	5.29944e-05	0.000315237	0.000204941	6.04104e-05	4.9772e-05	0.000151666	0.000128005	0.000617193	0.000408706	6.81898e-05	5.43593e-05	2.62392e-05	1.96224e-05	0.000174175	3.79609e-05	0.000152211	0.000100531	0.000369656	0.00012449	0.00068684	0.000227437	0.000292001	7.42891e-05	0.000120744	8.84617e-05	0.000194147
ID_91	0.00384212	0.00105386	0.00259692	0.000179624	0.00332236	0.00087302	0.000430967	0.000133856	0.0004862	8.63951e-05	0.000639253	0.000273407	0.000446455	0.00015356	0.000434995	0.000262995	0.000316187	7.41482e-05	0.000283329	0.000198206	0.000998471	0.000932705	7.7107e-05	3.14418e-05	0.000704817	0.00028497	0.00482594	0.00197019	0.00734932	0.00343688	0.00563788	0.00272513	0.00794411	0.00138892	0.00715176	0.004131	0.00348143	0.00169976	0.000106912	4.99335e-05	0.000152533	5.09558e-05	0.00350151	0.000813726	0.00746362	0.0066597	0.0029483	0.00122724	0.0026074
ID_92	0.00731804	0.000994297	0.00664454	0.000515932	0.00661651	0.00138859	0.000588382	0.000192806	0.000366892	0.000178987	0.000275287	9.35106e-05	0.00043951	0.000206994	0.000330206	0.000212787	0.000756405	0.000187479	0.000399073	9.38128e-05	0.000316643	7.84555e-05	0.000788583	0.000235586	0.000114448	1.7854e-05	0.00115506	0.000520606	0.0015448	0.000547862	0.00189225	0.000713451	0.00233002	0.000644218	0.00210234	0.000366695	0.00167275	0.000251475	0.000829727	0.000351369	0.0019718	0.000348326	0.00322216	0.000465173	0.004447	0.000658121	0.000826993	0.000352966	0.00058401
ID_93	0.00190358	0.000663559	0.00171524	0.000433914	0.0014815	0.000234697	0.00116142	0.000263192	0.0027205	0.000114083	0.0024341	4.89542e-05	0.00230444	0.000678818	0.000958021	0.000500449	0.00251967	0.000853668	0.0021204	0.00045688	0.00170266	0.000175735	0.00197128	0.000445121	0.00269137	0.000448453	0.00324252	0.000447312	0.00121154	0.000261417	0.00144511	0.000216966	0.00144624	2.65163e-05	0.000580902	0.000225591	0.000871567	0.000541817	0.000886265	0.000672734	0.00152219	0.000850449	0.00139887	0.000888079	0.000672968	0.000593767	0.000265457	0.000112426	0.000389978
ID_94	0.000192067	8.88714e-05	0.000280925	0.000129033	0.000316295	0.000184812	0.000506708	0.000188483	0.000706381	0.000263316	0.000577862	0.000167135	0.000644363	5.9988e-05	0.000550322	0.000178476	0.000667833	9.452e-05	0.000643916	0.000140347	0.000613109	0.000191001	0.000576467	0.000242452	0.000654937	0.000165996	0.0016804	0.00051743	0.00121984	0.00092543	0.00132862	0.000493916	0.000772666	0.000256387	0.000427796	0.000106458	0.000541719	0.000138879	0.000376075	0.00018006	0.000980146	0.000139966	0.000573253	0.000147538	0.000183133	4.02021e-05	0.000262566	0.000146807	0.000615117
ID_95	0.000953896	0.000279263	0.00074745	8.77463e-05	0.00092258	0.000461858	0.00524737	0.00104757	0.00246877	0.000813332	0.0018208	8.44331e-05	0.00127453	0.000125631	0.00178798	0.000686279	0.00236567	0.000952118	0.00221889	0.000770571	0.00222649	0.000465763	0.00138949	0.000120884	0.00247141	0.000481461	0.00116311	0.000256781	0.00483973	0.00369647	0.00307823	0.000656644	0.00106232	0.00034632	0.0025747	0.0011803	0.00228281	0.000462072	0.00307961	0.000518266	0.00237984	0.000422799	0.00471697	0.000523857	0.00245448	0.00047072	0.00405073	0.00160489	0.0025175
ID_96	0.00167595	0.000535316	0.00142216	0.000341038	0.00157874	0.00031549	0.00571623	0.00465195	0.00092253	0.000996917	0.0018489	0.00218654	0.00236325	0.00159256	0.00047228	0.000211355	0.0099609	0.00705987	0.00192687	0.00170683	0.00111459	0.00143371	0.000269073	8.21941e-05	0.0033473	0.00352213	0.00021428	9.38197e-05	0.00137996	0.00155351	0.00105086	0.00102769	0.000179808	5.433e-05	0.000290085	0.000295682	0.00154917	0.00101299	0.000616598	0.000475143	0.000527126	0.000471466	0.000135797	0.000146896	0.00101744	0.0004992	0.000854304	0.000528046	0.000975299
ID_97	0.000386828	7.94062e-05	0.000233339	6.20261e-05	0.000159054	2.01935e-05	0.00114398	0.000215392	0.000709451	0.00010026	0.00218888	0.000650629	0.00236926	0.00103172	0.00085162	0.000271719	0.00106002	0.000197352	0.00129923	0.000315596	0.00141932	0.000228991	0.0019132	0.000379391	0.00126978	0.000477276	0.000761404	3.68085e-05	0.00125998	0.000380987	0.00146638	0.000214991	0.00185049	0.000613369	0.000846615	0.000149983	0.00129156	0.000391914	0.00061417	0.000112875	0.000631939	9.5281e-05	0.00112586	0.000109106	0.000824601	0.000735817	0.000950985	0.000552123	0.00164505
ID_98	0.00655483	0.000824007	0.00557572	0.00150609	0.00616955	0.000274711	0.00291012	0.000801665	0.00301294	0.000809551	0.00297357	0.000944204	0.00347457	0.000730184	0.00325219	0.000349086	0.00150688	0.000901787	0.00148781	0.000258519	0.0022781	0.000748335	0.00239682	0.000365692	0.00457017	0.00118848	0.00279234	0.00101481	0.00252537	0.000799171	0.00351736	0.00109932	0.0012955	0.00017752	0.00113662	0.000262445	0.00107576	0.000265194	0.00106906	0.000235395	0.00521568	0.00163482	0.00263019	0.00126423	0.000783531	0.000474113	0.000579985	0.000153375	0.000273851
ID_99	0.000865095	0.000319846	0.000742157	8.38696e-05	0.00132245	0.000222469	0.000710728	0.00062715	0.00129575	0.00137322	0.00172495	0.00185	0.00267069	0.00126084	0.00132569	0.000151935	0.0021707	0.000982581	0.00396346	0.00253298	0.00250232	0.00188457	0.00121588	0.000667303	0.00270735	0.00161042	0.000197874	6.78777e-05	0.000878125	0.000271518	0.000112151	5.90927e-05	0.000492748	0.000369947	0.00136263	0.00117018	2.72956e-05	3.86017e-05	5.7203e-05	5.20709e-05	0.00042041	0.00047156	2.74627e-05	2.03426e-05	0.000292704	0.000292	0	0	1.27018e-05
ID_100	0.000504418	3.22763e-05	0.000472909	0.0002044	0.000455817	0.000125675	0.00205051	0.000453134	0.00216512	0.000526629	0.00259502	0.00092438	0.00232313	0.00062886	0.00346808	0.00114667	0.00318133	0.00153754	0.00184463	0.000270045	0.00218383	0.000277349	0.00303714	0.000572242	0.00289758	0.000892325	0.000350331	9.78337e-05	0.000385272	0.000129216	0.00129561	0.000728619	0.000379727	0.000102983	0.000484078	0.000232579	0.000377016	0.000119009	0.000342571	0.000114466	0.000340419	0.000133881	0.000329171	0.000308045	0.000229738	0.000136457	3.74448e-05	5.29549e-05	5.50837e-05
ID_101	0.00549097	0.000945016	0.00471111	0.000583141	0.00454662	0.000690327	0.000594397	0.000206167	0.000841579	0.000280904	0.000761869	0.000105837	0.000788855	0.000245136	0.000650968	1.57354e-05	0.00063453	0.00036385	0.000717335	0.000199232	0.000544007	0.00019736	0.000827459	0.00025654	0.000811957	8.4787e-05	0.000281527	0.000103722	0.000108863	4.74724e-05	0.000295391	0.000190921	0.000141179	3.0357e-05	0.000217992	3.7523e-05	0.000174175	3.79609e-05	2.79924e-05	3.95872e-05	0.000115542	0.000108354	4.99776e-05	4.13738e-05	0.000123972	6.93069e-06	0	0	3.56392e-05
ID_102	0.002455	0.000361538	0.00242935	0.000303826	0.00240436	0.000794213	0.00184701	0.000925386	0.0028823	0.000795637	0.00250514	0.000733158	0.00235692	0.000818562	0.00245925	0.00051452	0.00119382	0.00017157	0.00175863	0.0005398	0.0018506	0.000647672	0.00197837	0.000762879	0.00183249	0.00038557	0.0014849	0.000665016	0.00117209	0.000200105	0.00289811	0.000839575	0.00208376	0.000627554	0.00132354	0.000877102	0.00140136	0.000527674	0.000612078	0.000120493	0.000513213	0.000142865	0.00066082	0.000371837	0.00136159	0.00115559	0.000753858	0.000506183	0.000616271
ID_103	0.000394737	0.000133899	0.000515477	0.000104002	0.000371728	6.60164e-05	0.00136933	0.00178622	0.00197823	0.00133556	0.00034888	6.57762e-05	0.000370538	0.000143262	0.000242763	0.000164515	0.0195327	0.0145544	0.000182851	3.50965e-05	0.000381456	0.000107981	0.00027349	0.000144129	0.000169373	9.6877e-05	7.85013e-05	3.18948e-05	0.000364695	0.000305034	0.000203867	6.47978e-06	0.000351959	0.000176227	0.000172347	8.33438e-05	0.000382389	0.000169629	8.99506e-05	7.2905e-05	0.000165155	0.00011806	6.0731e-05	4.32345e-05	5.91611e-05	4.70897e-05	2.54608e-05	3.60071e-05	6.10428e-05
ID_104	4.44879e-05	3.4327e-05	7.07566e-05	6.56421e-05	3.08985e-05	4.36971e-05	0.000417115	0.000483595	0.000454997	0.000603762	3.67967e-05	3.00492e-05	0	0	2.40068e-05	1.71918e-05	0.00020068	6.44318e-05	0.000182818	3.6259e-05	0.0154889	0.021811	9.64374e-05	3.15734e-05	3.93645e-05	2.91175e-05	0.000228667	5.48368e-05	0.000520644	0.000475276	0.000142923	0.000135271	8.44428e-05	3.90874e-05	0.000346021	0.000205119	0.000230647	0.000108078	0.000137341	2.48294e-05	0.000268225	0.000115911	0.00060746	0.00025317	6.4811e-05	5.39884e-05	5.09217e-05	7.20141e-05	0.000300694
ID_105	8.17996e-05	0.000115682	0	0	2.27206e-05	3.21317e-05	0	0	0	0	0.00655391	0.00547899	2.8138e-05	2.02906e-05	0.000209609	0.000176927	3.54619e-05	2.56972e-05	3.09962e-05	4.38353e-05	7.48055e-05	0.000105791	5.39283e-05	4.24709e-05	0	0	1.27018e-05	1.79631e-05	4.00988e-05	3.22028e-05	1.08169e-05	1.52974e-05	4.4342e-05	6.2709e-05	0	0	0	0	0	0	0	0	0	0	0	0	0	0	0
ID_106	0.000161491	6.14791e-05	0.000137739	0.000103905	0.000139511	0.000145833	4.8949e-05	3.58119e-05	0.000204325	9.0043e-05	0.000280782	0.000242858	2.48886e-05	3.51978e-05	0.000161431	0.000116932	3.94555e-05	2.79087e-05	3.10286e-05	2.3359e-05	5.21331e-05	4.61518e-05	0.00207573	0.00260937	7.93704e-05	1.26023e-05	2.62464e-05	1.85877e-05	6.77327e-05	5.13712e-05	0.000180051	0.000189995	0	0	0.000111873	2.10731e-05	0.000147054	7.86358e-05	0.00567425	0.00428423	8.17817e-05	7.13231e-06	0.0102442	0.0108587	6.4811e-05	5.39884e-05	6.29056e-05	4.68399e-05	8.04873e-05
ID_107	0.000189344	6.39772e-05	8.21276e-05	6.83313e-05	9.90602e-05	8.36019e-05	0.000756586	0.00046461	0.000190614	0.000143085	0.00011312	3.34499e-05	0.000391625	9.26999e-05	8.9619e-05	5.14717e-05	0.00143661	0.00125455	0.000391033	0.000123828	0.000536253	0.000258421	0.000383024	0.000184438	0.000844352	0.000240162	7.14266e-05	3.12732e-05	9.26626e-05	0.000103132	0.000238477	0.000113475	0.000121129	7.71061e-05	0.000100821	3.10258e-05	0.00112246	0.000653293	0.000248437	0.000122312	0.00428443	0.00478623	0.00144939	0.000589384	0.00155732	0.000904186	0.000541499	0.000174705	0.00146209
ID_108	0.000751604	7.91972e-05	0.000325319	0.000115663	0.000763944	0.000226527	0.00518204	0.00388478	0.0018642	0.00148531	0.00121024	0.0005517	0.000871912	0.000163008	0.000850455	0.000341542	0.00128568	0.000593672	0.00114975	0.000514521	0.00182493	0.00113894	0.000453608	0.000206866	0.000329397	0.000173509	0.000203868	6.57348e-05	8.70277e-05	7.28008e-05	0.00032993	0.000213364	0.000208899	7.37328e-05	0.000353587	7.48898e-05	0.000500272	0.000158042	7.6828e-05	4.67099e-05	5.2948e-05	1.3772e-05	0.000142184	2.03799e-05	4.15084e-05	5.87018e-05	0.000213137	0.000231349	0.000210998
ID_109	0.000362256	5.93382e-05	0.000164102	7.01702e-05	0.000181775	2.01817e-05	0.00040067	0.000115951	0.00548325	0.00171943	0.00427012	0.00465491	0.00841876	0.00757971	0.00103784	0.00102436	0.000873588	0.000358331	0.000381135	9.39009e-05	0.000398494	0.000279944	0.0203176	0.0148194	0.00141539	0.000780182	0.000309697	4.14434e-05	0.00727073	0.00142004	0.00279832	0.00308653	0.00237698	0.000677889	0.000686828	0.000582227	6.46572e-05	5.03543e-05	0.000124563	4.20952e-05	0.000430462	0.000393058	0.000516697	0.000564354	8.55652e-05	6.05842e-05	7.63825e-05	0.000108021	0.000187405
ID_110	0.000905919	0.000176629	0.000879572	0.000427689	0.000897101	0.00026106	0.0010335	0.000143562	0.000944161	0.000159883	0.000872177	0.000278454	0.000812192	0.000203916	0.000852081	6.84186e-05	0.000906836	0.000118269	0.000998224	0.000135785	0.00114399	0.0003355	0.00107043	0.000396403	0.00124882	0.000122585	0.000228905	0.000122264	0.00037272	0.000275749	8.24345e-05	1.63527e-05	0.000150246	4.71393e-05	0.000180701	3.64258e-05	3.43747e-05	5.9124e-06	3.78049e-05	2.93092e-05	0.000158025	8.76251e-05	4.99776e-05	4.13738e-05	0.000162379	4.82285e-05	0	0	0.000119619
ID_111	7.91052e-05	1.81062e-05	9.1826e-05	6.92701e-05	0.000134531	0.000130325	0.000683161	0.000837729	2.18036e-05	3.08349e-05	8.72318e-05	4.5582e-05	0.000421422	0.000390708	9.18393e-05	8.08302e-05	0.000133804	6.19049e-05	0.000291331	0.000318507	0.000913159	0.000596771	0.000244078	0.000166621	0.000174934	4.80816e-05	5.41785e-05	7.662e-05	0.000818731	0.00032514	0.00115694	0.000620422	0.000683378	0.000520148	0.00156941	0.00161291	0.000210249	8.68844e-05	8.10117e-05	3.34847e-05	0.000369308	0.000429888	0.00254802	0.00114162	0.000702174	0.000418086	0.000423288	0.000164981	7.8021e-05
ID_112	0.00536541	0.00093449	0.00385974	0.000632645	0.00368539	0.00106713	0.000215663	9.90414e-05	0.000309435	0.000107114	0.00035301	0.000138293	0.000266434	8.79801e-05	0.000292789	0.000162721	0.000622655	0.000102574	0.000366452	0.000168972	0.000406179	3.95447e-05	0.000358508	7.47921e-06	0.000396852	6.30115e-05	0.00198472	5.64925e-05	0.00157823	0.000418891	0.00147566	0.000164421	0.00173678	0.000132537	0.0018155	0.000540305	0.00261703	0.000546194	0.000873822	0.00036409	0.000494786	0.000300003	0.00194255	0.000156066	0.00162268	0.000730286	0.00468566	0.00140617	0.00459684
ID_113	0.000368056	8.51385e-05	0.000359861	8.52075e-05	0.000253135	0.000179141	0.000353156	0.000349377	0.00102011	0.000541304	0.000889934	0.00026509	0.00193862	0.00113656	0.000425936	7.8955e-05	0.000699464	0.000399387	0.000667455	0.000363542	0.000498218	0.00058407	0.000620793	0.000109482	0.000189532	3.10574e-05	0.000817472	0.000302026	0.00156297	0.000903005	0.00032211	0.000198392	0.00140337	0.000149338	0.000568771	0.000202533	0.000535814	0.000287031	0.000213942	0.00014006	0.000734236	0.000213991	0.000588373	0.000306033	0	0	0.000123278	2.10803e-05	0.00273066
ID_114	0.000113723	6.0983e-05	6.24243e-05	4.57109e-05	0.000100445	9.78912e-05	0.000109046	0.000113139	0.000385625	0.00022659	0.000163567	8.97885e-05	9.66067e-05	1.89915e-05	0.000231781	0.000117678	0.000115507	2.12778e-05	6.77218e-05	4.83979e-05	0.000121047	9.24665e-05	0.000106734	0.000110819	8.3657e-05	4.60144e-05	0.000120821	9.9544e-05	0.00131511	0.000732923	0.000891358	0.000837504	0.000879065	0.000549547	0.000472735	0.000101789	0.000186031	5.1507e-05	0.000409176	0.000154946	0.00148485	0.000261607	0.00110379	0.000891636	0.00264673	0.000433023	8.83665e-05	6.46278e-05	0.000190898
ID_115	0.000213916	4.79961e-05	0.000295917	0.000131386	0.000149073	0.000127243	0.000193727	9.31345e-05	0.000249781	0.000152975	0.000224875	5.81611e-06	0.000442394	0.000321076	0.000543781	0.000339289	0.000134398	8.01902e-05	8.65085e-05	2.24432e-05	0.000308509	0.000266448	0.000152397	5.67218e-05	0.00103994	0.000892508	0.00102719	0.000423929	0.00112422	0.000465424	0.00131061	0.000566033	0.00157877	0.000329672	0.00161855	0.000690262	0.000694747	0.000227739	0.000914856	0.000580495	0.000762965	0.000295196	0.000938875	0.000268383	0.000775333	0.000292953	0.000791986	0.000182826	0.00122593
ID_116	0.000197281	5.77294e-05	0.000108184	0.000152995	9.72573e-05	6.92131e-05	2.94412e-05	4.16362e-05	6.94572e-05	1.23422e-05	0.000151294	6.51919e-05	8.11646e-05	6.16533e-05	6.53595e-05	9.24323e-05	0.000177198	0.000143241	1.87868e-05	2.65685e-05	0.000145065	0.00014715	3.75378e-05	2.67863e-05	0.000107149	3.04004e-05	0.000104748	1.66972e-05	8.36127e-05	4.21268e-06	5.27176e-05	3.17608e-05	0.000105878	5.05644e-05	6.99069e-05	2.18854e-05	0.000127943	3.33304e-05	0.00016777	4.94299e-05	0.000417528	0.000134347	0.000169647	5.62969e-07	0.000118322	9.41795e-05	0.000321445	9.85707e-05	0.000170427
ID_117	0.00067906	9.22233e-05	0.000504259	6.1049e-05	0.000752997	0.000286952	0.000428318	0.000189649	0.000134868	9.0444e-05	0.000209837	0.000189772	0.00013844	6.93769e-05	8.74431e-05	5.07531e-05	0.000211043	0.000112938	0.00014046	0.000139853	0.00017113	0.000137484	0.000232444	9.11394e-05	0.000233504	1.35688e-05	0.000457369	0.000164655	0.000253933	0.000113572	0.000332496	0.000127178	0.000468296	0.000390178	0.000343891	0.000144214	0.000103634	7.55289e-05	0.000143617	0.000120085	0.000945729	0.000567357	0.000985547	0.000101604	0.000875449	0.000339746	0.000237462	0.000202911	0.000799928
ID_118	0.000416411	0.000180111	0.000146071	7.50994e-05	0.000272657	0.000145101	0.00049592	0.000294587	0.000308267	0.00019219	0.000576497	0.000105538	0.000275377	9.93268e-06	0.00028595	0.000109342	0.000826037	0.000860266	0.000499487	0.000164865	0.000463755	0.000240291	0.00063654	0.000245644	0.000181592	5.63035e-05	5.24929e-05	3.71754e-05	0.000155792	5.91643e-05	0.000277738	0.000331445	0.000305326	0.000149579	0.000209997	0.000150759	0.000130244	9.32001e-05	0.000239843	0.000142495	0.000103485	0.000118091	0.000372335	0.000354705	7.68138e-05	0.000108631	0.000218561	8.27514e-05	0.000119619
ID_119	0.011177	0.00221369	0.0106794	0.000706235	0.00882861	0.00232091	0.000545724	0.0001069	0.000556338	0.000237108	0.000873577	0.000120736	0.000610085	0.00023681	0.000535463	0.000179134	0.000841689	6.87626e-05	0.00056965	0.000125899	0.000412519	4.65471e-05	0.000688512	0.000166866	0.000454139	0.000126558	0.000228667	5.48368e-05	0.000123391	9.68372e-05	0.000215883	0.000149893	7.29892e-05	2.40024e-05	0.000111956	5.86562e-05	0.000104229	3.94398e-05	2.79924e-05	3.95872e-05	3.90447e-05	2.98122e-05	0.000120527	9.63407e-05	2.07542e-05	2.93509e-05	0.000139288	0.00012618	0.000162001
ID_120	0.000472495	7.32744e-05	0.000568663	0.000287779	0.000357175	0.000159444	0.00233192	0.00146807	0.000753546	7.04412e-05	0.000857303	0.000329199	0.000690186	0.000351643	0.00147025	0.000246525	0.000196146	5.6372e-05	0.000432543	0.000112216	0.000245678	0.000170349	0.000248834	7.86018e-05	0.00154251	0.000773313	0.000919542	0.000677124	0.00145092	0.00132115	0.000965684	7.12989e-05	0.00257099	0.00131379	0.00332838	0.00104665	0.000755738	0.000226373	0.000283739	0.00012998	0.000235087	0.000128622	0.000696862	0.000241385	0.00237104	0.00174006	0.00103741	0.000535315	0.000448554
ID_121	0.000105025	3.16095e-05	4.5913e-05	3.4635e-05	0	0	0.000183793	0.000110535	0.000491765	0.000175265	0.000497479	0.000224069	0.000572645	0.000108602	0.000752986	0.000371957	0.000385922	0.000110978	0.000378759	0.000102242	0.000443325	0.000238248	0.000354874	0.000187268	0.000468915	0.000259289	0.00125638	0.000848099	0.00027458	0.000218228	0.000628945	0.000512074	0.000372105	0.000194472	0.000177644	6.22598e-05	0.000203261	3.01768e-05	2.59005e-05	1.84928e-05	9.77389e-05	5.89183e-05	8.72587e-05	6.10599e-05	0.000103218	2.97749e-05	0.000148739	5.69423e-05	0.000119619
ID_122	0.00109379	0.00070887	0.00141718	0.000107151	0.001686	0.000184985	0.00141792	0.000758709	0.000929335	0.000307831	0.000887204	0.000168128	0.000907994	0.00017685	0.000714568	0.000185373	0.00101602	0.000389716	0.000431015	9.90826e-05	0.000706041	3.30309e-05	0.0012623	0.000113605	0.000575752	0.000147434	0.000431931	7.46887e-05	0.000167225	8.42535e-06	0.000485253	0.000212632	0.000132112	6.46504e-05	0.000225365	9.26685e-05	0.000240623	4.13868e-05	0.000553071	0.000450531	0.000329745	9.96243e-05	0.000477815	0.000236559	0.000553793	0.00036084	0.000123278	2.10803e-05	0.000318827
ID_123	0.00247658	0.00046189	0.0022869	0.000342237	0.00169045	0.000642147	0.000321066	9.9366e-05	0.000292708	7.16976e-05	0.000224875	5.81611e-06	0.000318957	7.35862e-05	0.000130927	9.25799e-05	0.000130404	7.89604e-05	0.000197501	7.43749e-05	0.000151405	0.000114679	0.000115553	9.94976e-05	0.000498576	0.000224652	0.0017532	0.000239036	0.00262812	0.000818807	0.00153829	0.000869725	0.00155656	0.000361996	0.00227535	0.000947809	0.000856799	3.39383e-05	0.000491817	0.00012749	0.000323999	0.000157257	0.000574038	0.000210816	0.000771678	0.000463982	0.00047606	0.00025832	0.000783861
ID_124	0.00018006	6.03641e-05	0.000253043	0.0001027	0.000384467	7.8785e-05	0.00208582	0.000803285	0.00164044	0.000136279	0.00233061	0.000391474	0.0016648	0.000487619	0.00146588	4.29021e-05	0.00176321	0.000545134	0.00178983	0.00024859	0.00135886	0.000354217	0.00206559	0.000482053	0.00159759	0.000339136	0.000925992	0.000249302	0.000671442	0.00019759	0.000751408	0.000375182	0.0013069	0.000439743	0.000750536	0.000420218	0.000727253	0.000348259	0.000469109	0.000111702	0.00028259	0.000150591	0.000390637	0.000205187	0.000697527	0.0008167	0.000209111	7.88723e-05	0.000229787
ID_125	0.000996067	4.61417e-05	0.000707615	0.000155236	0.00146197	0.000322612	0.00100671	0.000248123	0.000710619	0.000113422	0.000466107	0.000195528	0.00072033	6.77703e-05	0.000663828	0.000132344	0.000499701	9.90909e-05	0.000486495	5.96042e-05	0.000679524	0.000303282	0.000728081	0.000193034	0.000954361	0.000255386	0.00165514	0.000781715	0.0011416	0.00059354	0.000575699	0.000209804	0.00063247	0.000216493	0.000896521	0.000269054	0.00159799	0.000795004	0.00105722	0.000499565	0.00102452	0.000283834	0.00185402	0.000700834	0.000247944	1.38614e-05	0.000762594	0.000177306	0.000899702
ID_126	0.000396084	0.000190743	0.00049094	0.000187427	0.000396251	0.000173304	0.000816627	2.20181e-05	0.000876902	0.000184305	0.0010017	0.000189537	0.00103454	0.000162843	0.000832218	3.8698e-05	0.00140152	0.000254929	0.00108236	0.00016962	0.00121674	0.000410672	0.000848266	0.000105784	0.000874307	0.000230647	0.0012747	0.000224023	0.000905212	0.000101673	0.00111122	7.58255e-05	0.000757981	9.79184e-05	0.0010745	6.92731e-05	0.00167028	0.000295294	0.000754477	0.000170685	0.0011471	0.000177761	0.00125149	0.000136928	0.00100267	0.000408493	0.00153061	0.000208559	0.00133518
ID_127	1.85686e-05	2.62599e-05	2.6363e-05	3.72829e-05	8.77051e-05	7.6014e-05	0.000662854	0.000170877	0.000756563	0.00030802	0.000731851	0.000202364	0.00100501	0.000318603	0.000279884	0.000143088	0.000592329	0.000629462	0.00197713	0.000720613	0.000995079	0.000733002	0.00101762	0.000379915	0.00173207	0.00068176	0.000175569	0.000100653	9.63981e-05	5.10354e-05	0.000154844	0.000136354	3.76878e-05	2.84472e-05	8.56339e-05	1.60881e-05	0.000164794	5.90234e-05	4.32068e-05	3.43268e-05	0.000652926	0.000281746	0.00072471	0.00058366	0.000292001	7.42891e-05	0.000111294	9.3664e-05	0.000258683
ID_128	0.00141693	9.64827e-05	0.00140234	0.000136872	0.00119151	0.0003043	0.000769527	0.000365473	0.000580828	9.25916e-05	0.000864057	0.000147268	0.000727526	5.94838e-05	0.000692617	7.032e-05	0.000608355	0.000196669	0.000693732	0.00010125	0.000657112	0.000215518	0.000783272	0.000143834	0.000410168	0.00011142	0.000253501	0.000151795	0.000360022	9.91134e-05	0.000404065	4.08762e-05	0.000525147	0.000101215	0.000509861	0.000174248	0.000573351	0.000141585	0.00045429	0.000293622	0.000322454	0.000162034	0.000652763	0.000273092	0.000528645	0.000122279	0.000898087	0.000665141	0.000864476
ID_129	0.000930699	0.00021039	0.000947614	2.18818e-05	0.000962075	0.000145646	0.00115847	0.000463477	0.000883826	0.000197151	0.00131238	0.000433516	0.000775248	0.000225086	0.00108515	0.000286819	0.00154574	0.000560038	0.00118208	0.00037679	0.00102947	0.000175868	0.00157886	0.000192987	0.000341751	0.000143783	5.95676e-05	1.76218e-05	5.49473e-05	1.69459e-05	7.00823e-05	2.61833e-05	0.000128785	4.36342e-05	6.29907e-05	4.45413e-05	4.98133e-05	5.27611e-05	1.39962e-05	1.97936e-05	1.49303e-05	2.11146e-05	2.83206e-05	4.00514e-05	2.07542e-05	2.93509e-05	0	0	0
ID_130	0.000327081	0.000237685	0.000398654	0.000227068	0.000159054	2.01935e-05	4.14439e-05	5.86105e-05	4.76536e-05	3.57712e-05	4.90584e-05	3.46895e-05	4.38316e-05	3.87151e-05	0	0	6.4608e-05	1.70932e-05	2.774e-05	2.00164e-05	0	0	3.95692e-05	2.80018e-05	6.34981e-05	3.13837e-05	0	0	1.38169e-05	1.95401e-05	9.84082e-05	0.000115471	0	0	0	0	0.000152342	5.51355e-05	0.000415267	0.000287312	0.000415889	0.000183591	0.000372131	0.000110199	0.000598217	0.000590965	0.0021509	0.000785092	0.000814939
ID_131	9.28428e-06	1.31299e-05	0	0	0	0	0	0	0	0	1.22617e-05	1.73406e-05	0	0	0	0	0	0	0	0	1.47304e-05	2.08319e-05	0	0	1.15857e-05	1.63847e-05	0	0	0	0	0	0	0	0	0	0	1.18569e-05	1.67682e-05	1.19043e-05	1.68353e-05	0	0	0	0	3.84069e-05	5.43155e-05	3.49113e-05	4.93721e-05	0
ID_132	0.000492997	0.000101781	0.000261068	8.79096e-05	0.00067348	5.50715e-05	0.000922086	0.000431209	0.000424698	0.000115977	0.000436182	0.000461741	0.000415118	0.000195078	0.000314695	9.66204e-05	0.000205267	2.09751e-05	0.000206486	0.000114205	9.04328e-05	6.39949e-05	0.000137823	0.000117236	0.00013	7.14272e-05	7.93441e-05	3.29141e-05	0.000111247	3.88034e-05	0.000205427	0.000125497	8.44428e-05	3.90874e-05	0.000235338	5.53905e-05	2.37138e-05	3.35364e-05	3.78049e-05	2.93092e-05	4.2737e-05	3.40871e-05	7.92332e-05	6.99554e-05	3.84069e-05	5.43155e-05	0	0	4.8341e-05
ID_133	0.000381382	0.00022649	0.00027092	3.83325e-05	0.000173597	7.45772e-05	0.000107831	4.95207e-05	0.000136716	0.000149498	0.000391196	0.00021174	6.42201e-05	4.71782e-05	8.73542e-05	8.1796e-05	4.51773e-05	1.26519e-05	6.19924e-05	8.76705e-05	6.05236e-05	4.62332e-05	4.04776e-05	5.7244e-05	7.01559e-05	5.67656e-05	0.000254914	6.78013e-05	2.96969e-05	4.19978e-05	0.000200198	4.33648e-05	0.00022509	0.00013774	7.45821e-05	1.40487e-05	0.000179372	0.000113651	0	0	2.41144e-05	3.41029e-05	0.000135443	9.95446e-05	0.00010067	7.69469e-05	0.000222588	0.000187328	0
ID_134	0.000253336	0.000283603	9.1826e-05	6.92701e-05	0.000275834	0.000336628	0.00118002	0.00125722	0.000194522	9.98115e-05	2.45351e-05	3.46978e-05	0.000342953	0.000288668	0.000716477	0.000591096	1.94307e-05	2.74791e-05	6.53135e-05	3.37582e-05	1.47304e-05	2.08319e-05	0	0	0.000176673	0.000133162	0	0	1.38169e-05	1.95401e-05	2.31691e-05	3.2766e-05	0	0	1.5727e-05	2.22413e-05	0	0	0	0	0	0	0	0	0	0	0	0	0
ID_135	0.00300384	0.000440831	0.00195084	0.000120137	0.00222076	0.00107005	7.83902e-05	1.15683e-05	5.74564e-05	8.12556e-05	7.49467e-05	6.01012e-05	1.24443e-05	1.75989e-05	5.25431e-05	7.43071e-05	0.000133209	7.6841e-05	5.54799e-05	4.00329e-05	2.31209e-05	3.26978e-05	7.52901e-05	7.29252e-05	0.000179541	8.07027e-05	0.000133761	0.000138809	0.000207645	8.82025e-05	0.000131651	4.77356e-05	0.000197977	8.37161e-05	0.000208905	0.000252155	5.33107e-05	4.35651e-05	4.23332e-05	3.75605e-05	1.49303e-05	2.11146e-05	3.87201e-05	2.8449e-05	0	0	0.000109801	9.17905e-05	8.04873e-05
ID_136	0.000823741	0.000189029	0.000514111	2.86066e-05	0.000933827	0.000413759	0.000302413	0.000171471	0.000803921	0.000508936	0.000346139	0.000147615	0.000867952	0.000797745	0.000360621	0.000137179	0.00059594	0.000301994	0.000243995	9.37204e-05	0.000186757	8.7351e-05	0.000302763	7.32709e-05	0.000310183	8.98651e-05	0.000328026	6.44452e-05	0.000302691	9.68962e-05	0.000645107	0.000255793	0.000199388	1.59493e-05	0.000673272	0.000232721	0.0010535	0.000192558	0.000510568	4.71771e-05	0.00047253	0.000173817	0.000650697	0.000145981	0.00096301	0.000600492	0.0021789	0.00088	0.000915283
ID_137	0.00112004	0.000248186	0.000956099	0.000146791	0.00100018	0.000460421	0.000489849	7.28225e-05	0.000556495	0.000301353	0.000137643	4.67553e-05	0.000341207	0.000291621	0.000347894	0.000367121	0.000202462	0.000122897	0.00125363	0.00146749	0.000119894	9.11822e-05	0.000261377	0.000164616	0.000498609	0.000357576	0.000194171	0.000178891	0.00121085	0.00079558	0.000586876	0.000465778	0.000949218	0.000829882	0.000582285	0.000225205	0.000134512	2.3318e-05	0.000117943	4.297e-05	0	0	3.37724e-05	4.77613e-05	0.000257399	0.000191978	0	0	0
ID_138	0.00216754	0.000229855	0.00146838	0.000151189	0.00163777	0.000476075	2.94412e-05	4.16362e-05	0	0	1.22617e-05	1.73406e-05	1.24443e-05	1.75989e-05	0	0	0	0	0	0	0	0	1.72989e-05	2.44644e-05	2.77788e-05	2.0437e-05	2.62464e-05	1.85877e-05	0	0	8.68236e-06	1.22787e-05	0	0	0	0	0	0	0	0	0	0	0	0	0	0	0	0	0
ID_139	0.00173138	0.00065792	0.00249148	0.000704973	0.00226983	0.000924499	5.01632e-05	3.70433e-05	5.05318e-05	3.67241e-05	3.67967e-05	3.00492e-05	1.34436e-05	1.90121e-05	0	0	0	0	1.54981e-05	2.19176e-05	1.47304e-05	2.08319e-05	0	0	0	0	0.000368293	0.000264558	0.00012919	9.88256e-05	3.10838e-05	3.68348e-06	0.000142617	0.000177948	2.67788e-05	1.97823e-05	1.18569e-05	1.67682e-05	0	0	0	0	0.00366808	0.00137055	3.84069e-05	5.43155e-05	2.54608e-05	3.60071e-05	0
ID_140	0.00225575	0.000233565	0.00159432	0.000243156	0.00201408	0.000111	0.00037901	0.000183895	9.81854e-05	5.25742e-05	0.000239879	0.000106155	0.000254486	0.000167051	0.000187911	6.28213e-05	8.51727e-05	6.09134e-05	0.000198349	1.91812e-05	0.000217371	8.57429e-05	0.000266133	5.96169e-05	0.000272548	7.02701e-05	0.000180388	0.000117166	8.25811e-05	3.26879e-05	8.3178e-05	7.01171e-05	0.000215109	6.08984e-05	0.000320778	0.000242153	8.35932e-05	4.72387e-05	1.52144e-05	2.15165e-05	9.56851e-05	2.19782e-05	5.57833e-05	2.15038e-05	3.84069e-05	5.43155e-05	0.000364409	0.000286643	0.000354994
ID_141	0.00149296	0.000215467	0.00133462	0.000330673	0.00125109	5.04518e-05	0.000314775	8.97185e-05	0.00106317	0.000354691	0.000962174	0.000110299	0.00048243	0.000300998	0.000336228	9.15243e-05	0.000977218	0.000171229	0.000281536	0.000103263	0.000415018	9.91523e-05	0.000587923	0.000443111	0.000292074	4.29671e-05	0.000393126	0.000336236	0.000862409	2.55035e-05	0.000609779	0.000225296	0.000361087	5.00769e-05	0.000676233	0.000394751	0.000365153	0.000245984	0.000169517	0.000124702	0.00079683	0.000289317	0.000969741	0.00064852	0.000186235	8.87141e-05	0.00104325	0.000389203	0.0010275
ID_142	0.00523488	0.00066001	0.00421748	0.000751742	0.00561428	0.0010285	2.82271e-05	3.99191e-05	0	0	1.22617e-05	1.73406e-05	2.8138e-05	2.02906e-05	0.000102821	9.45245e-05	9.71534e-06	1.37396e-05	3.09962e-05	4.38353e-05	0	0	0	0	1.19065e-05	1.68383e-05	1.27018e-05	1.79631e-05	0	0	1.15845e-05	1.6383e-05	0	0	1.10518e-05	1.56296e-05	1.36478e-05	1.93009e-05	0	0	0	0	0	0	0	0	0	0	0
ID_143	0.00414646	0.000714009	0.00321532	0.000572698	0.00370134	0.000782286	8.71095e-05	7.21364e-05	8.1458e-05	5.80294e-05	2.45233e-05	3.46812e-05	0.000123299	0.00014678	8.29581e-05	3.74199e-05	0.000100664	6.19387e-05	9.30858e-05	7.00769e-05	8.36445e-05	6.01281e-05	7.21356e-05	6.40712e-05	6.77847e-05	2.56058e-05	7.93441e-05	3.29141e-05	2.62819e-05	3.71682e-05	3.76316e-05	3.19659e-05	3.81582e-05	4.4104e-06	0.000149164	2.80975e-05	0	0	1.39962e-05	1.97936e-05	0	0	8.10261e-06	1.14588e-05	3.84069e-05	5.43155e-05	0	0	9.6682e-05
ID_144	0	0	0	0	0	0	0	0	0	0	0	0	1.34436e-05	1.90121e-05	0	0	1.54371e-05	2.18314e-05	1.87868e-05	2.65685e-05	0	0	0	0	1.15857e-05	1.63847e-05	0	0	2.62819e-05	3.71682e-05	8.68236e-06	1.22787e-05	0	0	0	0	0	0	1.39962e-05	1.97936e-05	6.21322e-05	6.08075e-05	1.93601e-05	1.42245e-05	0	0	0	0	0
ID_145	0.000975914	0.000377694	0.000645926	0.000214441	0.000678053	0.000180111	0.00342831	0.00433159	0.000152083	0.000116778	0.000111743	5.10674e-05	0.000660465	0.000454142	0.00141413	0.00189804	0.000434982	0.000335552	0.004164	0.0014857	0.000106765	8.50386e-05	0.000212899	0.000155202	0.00231835	0.00143352	0.000217175	0.000140135	2.62819e-05	3.71682e-05	1.73647e-05	2.45574e-05	8.06454e-05	8.99487e-05	8.04192e-05	2.35864e-05	8.86997e-06	1.2544e-05	9.12867e-05	0.000129099	9.54774e-05	0.00011044	1.12575e-05	1.59204e-05	3.84069e-05	5.43155e-05	0	0	4.23819e-05
ID_146	1.66351e-05	2.35255e-05	0	0	0	0	0	0	0	0	0	0	0	0	0	0	2.00248e-05	2.83194e-05	0	0	0	0	0	0	0	0	0	0	0	0	0	0	0	0	0	0	1.18569e-05	1.67682e-05	4.44251e-05	3.73074e-05	8.28086e-05	3.85463e-05	6.2093e-05	4.44112e-05	2.07542e-05	2.93509e-05	2.54608e-05	3.60071e-05	4.23819e-05
ID_147	4.39016e-05	3.36633e-05	0	0	2.27206e-05	3.21317e-05	2.0722e-05	2.93053e-05	0	0	0	0	1.34436e-05	1.90121e-05	1.08932e-05	1.54054e-05	0	0	0	0	0	0	0	0	0	0	0	0	0	0	0	0	1.47807e-05	2.0903e-05	0	0	0.000172978	2.95467e-05	0.000483223	0.000144299	0.000416858	0.000129376	0.000268163	5.937e-05	0.00043178	0.000378553	0.000222588	0.000187328	0.000368851
ID_148	0	0	0	0	0	0	0	0	0	0	0	0	0	0	0	0	0	0	0	0	0	0	0	0	0	0	0	0	0	0	0	0	0	0	0	0	0.000142787	5.41397e-05	6.82338e-05	2.02521e-05	0.000318139	0.000335492	0.000284445	9.98417e-05	0.000200786	0.00010249	6.03722e-05	4.42308e-05	1.27018e-05
ID_149	0.000265168	2.43229e-05	0.000271073	7.72904e-05	0.000256312	5.25233e-05	0.000448185	0.000400185	6.6579e-05	4.83861e-05	0.000151294	6.51919e-05	0.000256133	0.000219866	0.000386937	0.000234704	0.00163884	0.00104696	0.000138732	6.6952e-05	0.00024344	0.000171391	0.000495991	0.000204055	0.000141906	5.60382e-05	8.32855e-05	7.96055e-05	6.87642e-05	1.72051e-05	6.79719e-05	5.67939e-05	7.29892e-05	2.40024e-05	0.000193289	0.000114607	0.000835854	0.00074636	4.1115e-05	4.10083e-06	5.11019e-05	4.45252e-05	0.000228939	0.000147876	0.000233543	0.000247504	0.000339663	0.000427484	0.000378303
ID_150	0.00180687	0.000455618	0.00114294	0.00032779	0.00120925	0.000155644	5.01632e-05	3.70433e-05	7.63818e-05	7.1722e-05	0.000140397	0.000121427	0.000132494	0.000106982	5.02339e-05	4.97554e-05	0.000164678	1.83341e-05	0.000151822	1.25741e-05	7.5254e-05	2.80786e-05	0.000113736	7.37425e-06	7.41217e-05	7.32108e-05	0.000131599	7.47834e-05	0.000109895	3.38918e-05	3.89985e-05	2.80674e-05	2.62342e-05	1.89927e-05	0.000111334	3.24504e-05	1.36478e-05	1.93009e-05	0	0	0	0	2.83206e-05	4.00514e-05	0	0	0	0	0
ID_151	0.00764945	0.00201202	0.00782568	0.00120173	0.00768734	0.00018182	0.0006064	0.000121667	0.000916985	0.000517432	0.000930779	0.000273911	0.000692833	0.000260507	0.000981946	0.00064859	0.000451607	0.000237074	0.000628353	0.000250892	0.000621948	9.74391e-05	0.000778855	7.53065e-05	0.00145824	0.00106543	0.000734017	0.00044076	0.00104772	0.000912232	0.000405242	0.00035304	0.00109711	0.000196347	0.00169991	0.00107449	0.000191999	0.00012011	0.000274338	0.000132619	0.00146928	0.000771035	0.00101632	0.000604968	0.000279445	0.00027056	0.000112334	0.000158865	0.000665924
ID_152	0.00109295	0.000208499	0.000861712	0.000218072	0.00152875	0.000125955	0.000227666	4.17607e-05	0.000562444	0.000252529	0.00144205	0.000743971	0.000541208	0.000363551	0.000251481	0.000218247	0.000515841	0.000189461	0.00038107	0.000223699	0.000377615	0.00013599	0.00030458	4.40221e-05	0.000495749	5.56257e-05	0.000502311	0.000182682	0.000666675	0.000291163	0.000600449	0.000162104	0.000274293	8.14945e-05	0.000388429	0.000246692	0.000353218	0.000128964	0.000181993	0.000114077	0.00126709	0.000645958	0.00135683	0.000554887	0.000315303	0.00015193	0.000281467	4.03182e-05	0.000277101
ID_153	0.000699911	0.000373935	0.000487901	0.000116237	0.000549897	0.00016229	0	0	7.926e-05	7.10476e-05	0.000111767	7.88975e-05	4.05823e-05	3.08266e-05	8.96634e-05	5.15981e-05	0.000105197	3.31858e-05	1.87868e-05	2.65685e-05	8.99843e-05	1.75283e-05	3.75378e-05	2.67863e-05	3.2386e-05	4.58008e-05	0.000211419	8.55525e-05	0.000137849	0.000108604	0.000198662	9.43086e-05	0.000472261	0.000189432	0.000274676	0.000323863	0.000423674	0.000233354	0.00016115	1.76653e-05	8.17817e-05	7.13231e-06	0.000381799	0.000332976	0.000147275	8.55549e-05	0.000288384	0.000173072	0.000183912
ID_154	0.00110554	0.000163757	0.000685026	8.07477e-05	0.000811607	0.000314424	0.000321342	0.000222873	0.000208372	3.70265e-05	0.000186714	2.67784e-05	4.15815e-05	4.07672e-06	0.000282193	0.000246438	0.00027738	0.000139949	8.08116e-05	3.21975e-05	7.57024e-05	5.73396e-05	0.000321879	3.12449e-05	6.31774e-05	1.03525e-05	5.87248e-05	1.45305e-05	5.83623e-05	5.5852e-05	6.21676e-05	7.36697e-06	5.86789e-05	4.43831e-05	0.00013803	0.000106253	1.36478e-05	1.93009e-05	4.19886e-05	5.93808e-05	0	0	1.12575e-05	1.59204e-05	0	0	2.54608e-05	3.60071e-05	0
ID_155	0.00287293	0.000351851	0.00216797	0.000164499	0.00331711	0.00100925	0	0	2.18036e-05	3.08349e-05	2.45351e-05	3.46978e-05	1.34436e-05	1.90121e-05	1.08932e-05	1.54054e-05	2.51524e-05	1.91162e-05	1.54981e-05	2.19176e-05	3.74028e-05	5.28955e-05	0	0	2.34922e-05	1.66161e-05	1.97765e-05	2.79682e-05	2.62819e-05	3.71682e-05	1.15845e-05	1.6383e-05	0	0	0	0	0	0	0	0	0	0	0	0	0	0	0	0	0
ID_156	0.0042071	0.000940426	0.00321972	0.000688717	0.00355238	4.83141e-05	0.000865935	0.000262064	0.000474008	0.000246283	0.000335265	8.51842e-05	0.000326958	0.00013719	0.000253656	0.000155401	0.000156636	0.00013257	0.000204926	0.000101218	0.000407076	0.00013715	0.000343455	0.000167819	0.000363048	0.000190212	8.5814e-05	2.64321e-05	9.50461e-05	4.69831e-05	0.000114885	3.51508e-05	3.48311e-05	2.80633e-05	0.000111873	2.10731e-05	0.000101333	2.89681e-05	7.24175e-05	5.3128e-05	0.000122673	1.06985e-05	2.43078e-05	3.43765e-05	0.000168029	6.82085e-05	9.52835e-05	8.6553e-05	0.000122869
ID_157	0.00289305	0.000222036	0.00196069	0.000102055	0.00298887	0.000524865	2.82271e-05	3.99191e-05	9.4139e-05	8.03087e-05	0	0	3.83322e-05	3.0515e-05	3.71648e-05	3.23319e-05	9.71534e-06	1.37396e-05	3.75735e-05	5.3137e-05	2.31209e-05	3.26978e-05	0	0	1.19065e-05	1.68383e-05	0	0	0	0	2.02669e-05	1.47651e-05	1.19239e-05	1.6863e-05	1.10518e-05	1.56296e-05	0	0	0	0	0	0	0	0	0	0	0	0	0
ID_158	0.000968011	0.000193133	0.000674592	0.000297888	0.000892947	0.00024941	0	0	0	0	0	0	1.56937e-05	2.21942e-05	7.42407e-05	6.45492e-05	8.00451e-05	1.42791e-05	1.22418e-05	1.73126e-05	1.47304e-05	2.08319e-05	2.02388e-05	2.8622e-05	1.19065e-05	1.68383e-05	1.27018e-05	1.79631e-05	1.38169e-05	1.95401e-05	2.24014e-05	1.58681e-05	0	0	2.15641e-05	1.52624e-05	0	0	0	0	0	0	0	0	0	0	0	0	0
ID_159	0.000199975	0.000114351	9.8639e-05	4.37952e-05	9.90602e-05	8.36019e-05	0.000285334	4.81056e-05	0.000296754	3.51235e-05	0.000314825	0.000130732	0.000266434	8.79801e-05	0.000242377	6.04118e-05	0.00036077	9.18627e-05	0.00026363	5.93114e-05	0.000248883	8.57179e-05	0.000296668	8.39147e-05	0.000323828	0.000110516	0.00046309	0.00019012	0.000332067	4.48355e-05	0.000357583	0.000143657	0.000310535	3.26738e-05	0.000448281	0.000142451	0.000643206	0.000185732	0.000400875	0.000131143	0.000440568	0.000139077	0.000387755	0.000220795	0.000587806	0.000168517	0.00104107	0.000161511	0.00039672
ID_160	0.00107828	0.00018725	0.000862754	0.00023269	0.0168878	0.0224083	7.83902e-05	1.15683e-05	9.4139e-05	8.03087e-05	8.58668e-05	9.65976e-05	5.50251e-05	1.85593e-05	1.08932e-05	1.54054e-05	1.94307e-05	2.74791e-05	3.10286e-05	2.3359e-05	0	0	0	0	1.6193e-05	2.29004e-05	0	0	0	0	1.08169e-05	1.52974e-05	2.62342e-05	1.89927e-05	5.88551e-05	8.36e-06	0	0	0	0	0	0	0	0	0	0	0	0	0
ID_161	0.00218428	0.000987355	0.00362538	0.00115176	0.00394459	0.000243743	0.000114122	0.000105305	2.18036e-05	3.08349e-05	0.000137643	4.67553e-05	5.2775e-05	5.05873e-05	0.000100512	4.05728e-05	6.97356e-05	5.02714e-05	6.77542e-05	6.05113e-05	8.20423e-05	7.27186e-05	7.21356e-05	6.40712e-05	9.15976e-05	4.43147e-05	3.89482e-05	3.11358e-05	2.96969e-05	4.19978e-05	1.94993e-05	1.40337e-05	0	0	1.05123e-05	1.48666e-05	8.86997e-06	1.2544e-05	0	0	0	0	1.12575e-05	1.59204e-05	2.07542e-05	2.93509e-05	3.49113e-05	4.93721e-05	0
ID_162	0.00139315	0.000255954	0.00129352	0.000452037	0.00148148	0.00026584	0	0	0	0	0	0	2.8138e-05	2.02906e-05	2.62715e-05	3.71536e-05	0	0	3.10286e-05	2.3359e-05	0	0	0	0	0	0	1.27018e-05	1.79631e-05	0	0	0	0	0	0	0	0	0	0	0	0	0	0	0	0	0	0	0	0	0
ID_163	0.00155789	0.000345493	0.000906994	0.00021316	0.00133836	0.000250693	0.000194941	0.000120221	0.000161886	0.000115189	0.000111743	5.10674e-05	0.000104356	9.26735e-05	6.33919e-05	2.17168e-05	6.91957e-05	5.07184e-05	0.000166505	9.03743e-05	0.000148906	8.40352e-05	5.68682e-05	3.68713e-06	0.000189212	4.05311e-05	0.000105591	2.08167e-05	0.000114662	8.12353e-05	0.000112919	8.60047e-05	3.81582e-05	4.4104e-06	3.20763e-05	2.5761e-05	0	0	0	0	0	0	0	0	0	0	0	0	0
ID_164	0.000898776	0.000244464	0.000883823	0.000135123	0.00104617	0.000361081	0	0	0	0	2.45351e-05	3.46978e-05	0	0	2.62715e-05	3.71536e-05	0	0	0	0	0	0	0	0	0	0	1.35446e-05	1.9155e-05	0	0	1.08169e-05	1.52974e-05	0	0	0	0	0	0	0	0	0	0	0	0	0	0	0	0	0
ID_165	0.000670362	0.000106246	0.00113504	0.000106823	0.00103565	0.00024911	2.82271e-05	3.99191e-05	0.000107988	0.000109764	0.000100858	3.85668e-05	0	0	3.49e-05	2.6867e-05	9.71534e-06	1.37396e-05	0	0	6.05236e-05	4.62332e-05	2.02388e-05	2.8622e-05	2.31715e-05	3.27694e-05	3.97911e-05	3.31988e-05	1.38169e-05	1.95401e-05	6.13999e-05	2.63892e-05	2.62342e-05	1.89927e-05	5.36404e-05	3.965e-05	0.000111399	7.38688e-05	3.90231e-05	2.95329e-05	8.15741e-05	9.09922e-05	3.06175e-05	2.79336e-05	5.91611e-05	4.70897e-05	0.000120744	8.84617e-05	4.8341e-05
ID_166	0.00370654	0.000601252	0.00371591	0.000515403	0.00445263	0.000502625	8.83236e-05	0.000124908	6.25326e-05	5.35626e-05	0	0	1.24443e-05	1.75989e-05	5.25431e-05	7.43071e-05	0.000110379	5.13374e-05	7.42667e-05	1.49646e-05	5.21331e-05	4.61518e-05	2.02388e-05	2.8622e-05	4.66637e-05	4.32664e-05	3.24783e-05	2.45458e-05	1.48485e-05	2.09989e-05	2.16338e-05	3.05948e-05	1.19239e-05	1.6863e-05	0	0	1.18569e-05	1.67682e-05	0	0	0	0	8.10261e-06	1.14588e-05	2.07542e-05	2.93509e-05	0	0	0
ID_167	0.000508081	0.000230086	0.00025137	6.23333e-05	0.0001754	0.000139314	2.94412e-05	4.16362e-05	1.89254e-05	2.67646e-05	1.22617e-05	1.73406e-05	2.48886e-05	3.51978e-05	3.49e-05	2.6867e-05	3.54619e-05	2.56972e-05	0	0	7.5254e-05	2.80786e-05	3.75378e-05	2.67863e-05	1.15857e-05	1.63847e-05	1.35446e-05	1.9155e-05	1.38169e-05	1.95401e-05	4.76809e-05	3.4146e-05	0	0	0	0	0.000136813	4.27892e-05	4.32068e-05	3.43268e-05	5.58211e-05	2.39791e-05	6.70407e-05	1.48425e-05	4.40567e-05	6.23056e-05	0	0	7.37446e-05
ID_168	0.000662013	0.000283994	0.000678366	0.000144685	0.000701191	0.000115394	0.000326778	5.20559e-05	0.000222221	0.000153665	0.000126747	9.62491e-05	0.000158382	8.86823e-05	0.000139897	5.50673e-05	0.000344793	1.52159e-05	0.000199164	0.000114867	0.000156848	6.48482e-05	0.000278246	0.000123452	0.000171601	0.000126361	0.000331967	0.000148968	0.000194539	4.99486e-05	0.000109081	5.41583e-05	0.000166943	4.68277e-05	0.000214935	6.03625e-05	0.000121969	6.44326e-05	6.91074e-05	4.04088e-05	0.000211538	0.000209096	0.000111567	4.30076e-05	8.24636e-05	5.87197e-05	3.49113e-05	4.93721e-05	4.23819e-05
ID_169	0.000948653	0.000353975	0.000793363	5.42054e-05	0.000660322	0.000154463	2.94412e-05	4.16362e-05	5.74564e-05	8.12556e-05	8.8585e-05	6.52827e-05	8.21638e-05	3.04636e-05	2.40068e-05	1.71918e-05	6.52021e-05	3.94802e-05	7.42343e-05	8.04242e-05	0.000127387	6.90481e-05	3.45979e-05	4.89288e-05	5.88909e-05	4.43874e-05	5.33357e-05	5.09181e-05	8.70277e-05	7.28008e-05	3.18514e-05	2.86715e-05	3.53014e-05	2.92151e-05	1.5727e-05	2.22413e-05	1.18569e-05	1.67682e-05	0	0	6.86976e-05	4.00588e-05	8.10261e-06	1.14588e-05	0	0	0	0	0
ID_170	1.85686e-05	2.62599e-05	0	0	0	0	0	0	2.18036e-05	3.08349e-05	0.00201467	0.00145811	5.40259e-05	1.48526e-05	6.55678e-05	9.27268e-05	0	0	0	0	1.47304e-05	2.08319e-05	3.86608e-05	5.46746e-05	1.15857e-05	1.63847e-05	0	0	0	0	0	0	0	0	1.05123e-05	1.48666e-05	0	0	0	0	0	0	0	0	0	0	0	0	0
ID_171	0.000267688	9.32913e-05	0.00036804	9.15887e-05	0.000318109	4.03869e-05	0.000169997	6.71104e-05	0.000233053	8.90072e-05	8.58316e-05	0.000121384	0.000274126	6.29989e-05	7.42407e-05	6.45492e-05	0.000344847	0.000139036	0.000188548	4.99427e-05	0.000287631	0.000153238	0.000288404	0.000102725	0.000182554	3.18414e-05	1.97765e-05	2.79682e-05	0.000155792	5.91643e-05	5.42529e-05	3.54575e-05	0.000165027	4.6368e-05	0.000228961	7.35866e-05	3.61655e-05	3.41061e-05	9.8318e-05	5.42157e-05	0.000105896	2.7544e-05	9.85162e-05	5.94803e-05	4.40567e-05	6.23056e-05	3.49113e-05	4.93721e-05	1.27018e-05
ID_172	2.59193e-05	2.04195e-05	0	0	0	0	0.000115337	8.16095e-05	0	0	0.000163555	5.14261e-05	5.40259e-05	1.48526e-05	7.20648e-05	2.44343e-05	8.57668e-05	3.76019e-05	0.000101974	9.70256e-05	3.74028e-05	5.28955e-05	5.68682e-05	3.68713e-06	5.82494e-05	5.89517e-05	9.68302e-05	6.66919e-05	1.48485e-05	2.09989e-05	4.40352e-05	4.02821e-05	9.96938e-05	7.97467e-06	0.000108899	9.52866e-05	6.87493e-05	1.18248e-05	7.35179e-05	7.62318e-05	5.6848e-05	5.67722e-05	6.0731e-05	4.32345e-05	0.000108868	0.000112836	5.09217e-05	7.20141e-05	4.8341e-05
ID_173	5.45331e-05	7.71214e-05	0	0	2.59081e-05	3.66396e-05	0.000227666	4.17607e-05	0.000404062	5.52768e-05	0.000295715	0.000157045	0.000401926	0.000186279	0.000218281	0.000163481	0.000413934	9.15745e-05	0.000382047	0.000131379	0.000435191	9.1384e-05	0.000358722	0.00011874	0.000294631	8.9741e-05	0.000209257	0.000112929	0.000278152	5.01533e-05	0.000465465	5.96458e-05	0.000205101	5.02058e-05	0.000435984	7.50459e-05	0.000502482	7.2285e-05	0.000189142	4.75411e-05	0.000480479	8.40005e-05	0.00023174	4.39924e-05	0.000301455	0.000134377	6.03722e-05	4.42308e-05	0.00017121
ID_174	0.002295	0.000283768	0.00199858	0.000185343	0.00577795	0.00465499	0	0	4.36072e-05	6.16699e-05	2.45351e-05	3.46978e-05	0	0	2.40068e-05	1.71918e-05	8.52269e-05	6.75372e-05	2.774e-05	2.00164e-05	0	0	0	0	0	0	0	0	1.38169e-05	1.95401e-05	0	0	1.47807e-05	2.0903e-05	3.26159e-05	2.7082e-05	0	0	0	0	0	0	0	0	0	0	0	0	0
ID_175	0	0	0	0	0	0	0	0	0	0	0	0	0	0	0	0	0	0	0	0	0	0	0	0	0	0	0	0	0	0	0	0	0	0	0	0	4.44407e-05	4.53529e-05	2.38087e-05	3.36705e-05	4.82288e-05	6.82058e-05	1.12575e-05	1.59204e-05	4.40567e-05	6.23056e-05	8.83665e-05	6.46278e-05	6.77855e-05
ID_176	7.11681e-05	6.84605e-05	0.000133181	9.90245e-05	4.86286e-05	3.46065e-05	5.01632e-05	3.70433e-05	8.83826e-05	1.97151e-05	2.45351e-05	3.46978e-05	2.68871e-05	3.80242e-05	4.80136e-05	3.43836e-05	4.45831e-05	3.57174e-05	0.000120761	7.92989e-05	9.83748e-05	3.98137e-05	8.85262e-05	8.74544e-05	0.000118735	3.35554e-05	0.00040211	0.000181464	0.000460475	0.00032536	0.000154028	7.53194e-05	0.000167884	4.90474e-05	0.000127683	4.35637e-05	0.000124446	6.9321e-05	0.000270036	0.000163115	0.000481205	0.000260421	0.000251681	0.000184918	0.000196981	0.00023592	0.000256006	4.11913e-05	6.10428e-05
ID_177	8.89758e-05	6.8654e-05	0.000144552	2.59839e-05	8.45176e-05	7.65642e-05	0.000114122	0.000105305	0.000148717	8.33416e-05	6.13083e-05	8.67031e-05	7.62182e-05	8.09626e-05	8.74431e-05	5.07531e-05	4.51773e-05	1.26519e-05	0.000117505	5.3169e-05	0.000142566	2.64945e-05	3.75378e-05	2.67863e-05	4.73051e-05	4.46378e-05	3.33212e-05	2.4767e-05	8.39331e-05	8.90771e-05	3.97662e-05	8.76779e-06	9.30396e-05	7.08612e-05	0.000138195	5.84176e-05	1.18569e-05	1.67682e-05	1.19043e-05	1.68353e-05	4.19178e-05	3.67966e-05	0	0	0	0	0	0	0
ID_178	0.000426073	0.000110326	0.000413953	5.86561e-05	0.000428524	0.000187574	0.000500997	0.000146825	0.000429912	0.000119011	0.000581899	0.000218572	0.000992564	0.00033322	0.000312519	6.75076e-05	0.000318452	8.53501e-05	0.00029137	6.22597e-05	0.000246832	8.18235e-05	0.000423716	0.000281033	0.000656549	0.000172601	0.000235504	9.56845e-05	0.000130542	0.000109201	0.000227973	0.000157075	0.000194179	0.00013236	0.000127683	4.35637e-05	4.62316e-05	1.85605e-05	1.52144e-05	2.15165e-05	0	0	0	0	0.000120871	9.4416e-05	0	0	3.56392e-05
ID_179	0	0	0	0	0	0	2.0722e-05	2.93053e-05	0	0	2.45351e-05	3.46978e-05	0	0	0	0	0	0	0	0	0	0	0	0	0	0	0	0	1.48485e-05	2.09989e-05	0	0	0	0	0	0	8.86997e-06	1.2544e-05	0	0	0	0	1.12575e-05	1.59204e-05	3.84069e-05	5.43155e-05	0	0	2.54036e-05
ID_180	0.000695492	0.000248228	0.000589272	0.000137759	0.0023593	0.00213812	0.000116551	0.000110496	8.1458e-05	5.80294e-05	8.99617e-05	0.000102322	6.64702e-05	3.23113e-05	7.87702e-05	6.43519e-05	6.4608e-05	1.70932e-05	0.000133003	7.36866e-05	0.000121944	0.000115728	5.77766e-05	4.97488e-05	3.93645e-05	2.91175e-05	5.30977e-05	4.92376e-05	0	0	8.88381e-05	6.71314e-05	2.33775e-05	1.65404e-05	1.10518e-05	1.56296e-05	9.17775e-05	6.50059e-05	1.19043e-05	1.68353e-05	0.000150272	0.000130177	7.60012e-05	6.65254e-05	0	0	2.54608e-05	3.60071e-05	0
ID_181	0.000500962	0.000239726	0.000555037	0.000271261	0.000460807	7.13514e-05	0	0	0	0	1.22617e-05	1.73406e-05	0	0	2.40068e-05	1.71918e-05	9.71534e-06	1.37396e-05	0.000127338	3.9974e-05	4.62417e-05	6.53956e-05	6.91958e-05	9.78576e-05	2.80995e-05	2.05512e-05	2.70893e-05	3.831e-05	6.74123e-05	6.63768e-05	2.60471e-05	3.68362e-05	1.19239e-05	1.6863e-05	4.25058e-05	3.90863e-05	0	0	0	0	0	0	0	0	0	0	0	0	0
ID_182	1.85686e-05	2.62599e-05	0.000128041	8.75008e-05	0.000108623	9.58563e-05	0.000106617	4.56345e-05	4.0729e-05	2.90147e-05	0.000164932	0.000112566	7.5219e-05	8.14166e-05	6.11716e-05	1.6385e-05	0.000124628	4.79468e-05	8.41002e-05	6.02225e-05	0.000181571	0.0001387	8.85262e-05	8.74544e-05	1.15857e-05	1.63847e-05	0.000372968	6.26204e-05	8.01977e-05	6.44056e-05	0.000253084	4.14258e-05	0.000130727	8.17844e-05	0.000148707	7.32766e-05	0.000353036	7.15602e-05	0.000105694	8.57149e-05	0.000258222	5.34327e-05	0.000218689	8.81888e-05	0	0	0.000147246	0.000140827	0.000155259
ID_183	0.000491649	7.5801e-05	0.000412433	0.0001244	0.000352195	0.000108826	4.14439e-05	5.86105e-05	5.67762e-05	8.02937e-05	9.81285e-05	9.18049e-05	5.62759e-05	4.05813e-05	2.62715e-05	3.71536e-05	9.60763e-05	4.79442e-05	2.44837e-05	3.46252e-05	2.31209e-05	3.26978e-05	0	0	0	0	1.35446e-05	1.9155e-05	5.49473e-05	1.69459e-05	1.73647e-05	2.45574e-05	4.10149e-05	3.65095e-05	6.99069e-05	2.18854e-05	0	0	0	0	0	0	0	0	0	0	0	0	1.27018e-05
ID_184	2.72665e-05	3.85607e-05	1.80307e-05	2.54992e-05	7.45367e-05	6.36215e-05	0	0	0	0	2.45233e-05	3.46812e-05	2.68871e-05	3.80242e-05	2.40068e-05	1.71918e-05	0.000106386	7.70915e-05	6.20572e-05	4.67179e-05	1.47304e-05	2.08319e-05	7.7107e-05	3.14418e-05	7.44424e-05	4.59703e-05	8.49712e-05	2.26004e-05	9.84612e-05	2.49276e-05	4.26683e-05	1.91572e-05	7.96434e-05	4.0685e-05	2.21036e-05	3.12592e-05	4.91276e-05	4.38375e-05	4.32068e-05	3.43268e-05	9.46582e-05	5.22653e-05	5.49254e-05	4.06851e-05	7.68138e-05	0.000108631	5.09217e-05	7.20141e-05	9.74655e-05
ID_185	0	0	0	0	0	0	0	0	0	0	0	0	0	0	0	0	0	0	0	0	0	0	0	0	0	0	0	0	0	0	0	0	0	0	0	0	0.000120864	1.08417e-05	0	0	0.000202193	0.00015734	0.00024888	7.01168e-05	0.000135975	0.000150434	0.000120744	8.84617e-05	0.000128828
ID_186	0.000257028	0.000182753	0.000205457	9.53157e-05	0.000239956	0.000174334	2.94412e-05	4.16362e-05	7.926e-05	7.10476e-05	8.58434e-05	7.55841e-05	5.72752e-05	2.61116e-05	6.11716e-05	1.6385e-05	0.000220219	0.000184127	0.000182786	0.000100891	0.000136226	5.17365e-05	0.000126972	0.000106006	6.01648e-05	6.21503e-05	5.95676e-05	1.76218e-05	8.39331e-05	8.90771e-05	0.000108482	3.74254e-05	7.29892e-05	2.40024e-05	0.00011825	3.3607e-05	6.09846e-05	3.22163e-05	3.78049e-05	2.93092e-05	0.000142114	0.000119322	8.41039e-05	6.09855e-05	4.40567e-05	6.23056e-05	2.54608e-05	3.60071e-05	6.77855e-05
ID_187	4.44879e-05	3.4327e-05	4.5913e-05	3.4635e-05	0	0	0.000136058	5.23345e-05	0.000113064	6.00216e-05	0.000151294	6.51919e-05	6.64702e-05	3.23113e-05	0.000126784	4.34337e-05	0.000116641	8.12608e-05	2.44837e-05	3.46252e-05	2.31209e-05	3.26978e-05	3.75378e-05	2.67863e-05	3.93645e-05	2.91175e-05	0	0	4.00988e-05	3.22028e-05	7.66543e-05	4.68615e-05	1.19239e-05	1.6863e-05	3.26159e-05	2.7082e-05	4.32446e-05	7.38667e-06	2.38087e-05	3.36705e-05	7.15707e-05	5.26479e-05	4.76807e-05	2.66434e-05	4.40567e-05	6.23056e-05	0	0	0
ID_188	4.58351e-05	3.41161e-05	9.8639e-05	4.37952e-05	2.59081e-05	3.66396e-05	0	0	9.81854e-05	5.25742e-05	5.04234e-05	3.56945e-05	9.33573e-05	3.29276e-05	1.31136e-05	1.85454e-05	0	0	7.42667e-05	1.49646e-05	9.79264e-05	9.38176e-05	1.72989e-05	2.44644e-05	9.55635e-05	3.54869e-05	0.000158926	6.00434e-05	6.87642e-05	1.72051e-05	6.49013e-05	9.17844e-05	5.77382e-05	5.8221e-05	3.26159e-05	2.7082e-05	6.68676e-05	6.77093e-05	1.19043e-05	1.68353e-05	8.46548e-05	4.00998e-05	0.000172802	2.32724e-05	0.000120871	9.4416e-05	0.000111294	9.3664e-05	6.10428e-05
ID_189	0.0033553	0.000861644	0.00331104	9.56128e-05	0.00281513	0.00136083	0.00032377	0.000223128	0.000182522	6.08825e-05	0.000293055	0.000232803	0.000376232	8.16534e-05	0.000207522	3.56063e-05	0.00034533	0.000200448	0.00032155	6.79867e-05	0.000136674	0.000113306	0.000174453	9.14438e-05	0.00025238	0.000181209	9.93586e-05	4.52013e-05	0.000445534	0.000268228	0.000130284	9.2743e-05	0.000204657	8.26125e-05	0.000288978	3.26248e-05	5.21146e-05	1.97199e-05	1.52144e-05	2.15165e-05	0	0	8.10261e-06	1.14588e-05	0	0	0	0	0
ID_190	0.000650034	0.000177674	0.000478203	0.000186144	0.000253124	6.49983e-05	0.000149275	4.58517e-05	0.000141793	6.08999e-05	0.000100847	7.13891e-05	0.000175521	3.52446e-05	0.00014635	2.01689e-05	0.00014012	7.08685e-05	2.44837e-05	3.46252e-05	4.41911e-05	6.24956e-05	0.000110796	3.8946e-05	0.000205725	8.40463e-06	0.000119135	3.52435e-05	0.000211771	7.08214e-05	8.16668e-05	1.16377e-05	9.06266e-05	4.0669e-05	0.00012814	5.13943e-05	8.86997e-06	1.2544e-05	1.39962e-05	1.97936e-05	2.69875e-05	1.94047e-05	0	0	6.4811e-05	5.39884e-05	0	0	0
ID_191	0.00142097	0.00038411	0.000904586	0.000151467	0.00117018	0.000118797	5.01632e-05	3.70433e-05	2.18036e-05	3.08349e-05	7.49701e-05	6.01294e-05	3.83322e-05	3.0515e-05	3.93851e-05	3.2176e-05	4.05895e-05	3.86691e-05	3.75735e-05	5.3137e-05	0	0	0	0	4.73051e-05	4.46378e-05	1.27018e-05	1.79631e-05	0	0	0	0	1.19239e-05	1.6863e-05	2.15641e-05	1.52624e-05	0	0	0	0	0	0	0	0	0	0	0	0	0
ID_192	0.000482128	0.00042036	0.000526572	0.000575019	0.000907908	0.000535974	2.82271e-05	3.99191e-05	9.53072e-05	7.15423e-05	0.000196198	0.000227414	5.07765e-05	4.63161e-05	5.89068e-05	4.23965e-05	0.000240081	0.000169974	3.67255e-05	5.19378e-05	0.000112657	7.96914e-05	0.000403048	0.000101905	9.09562e-05	1.41031e-05	1.27018e-05	1.79631e-05	1.48485e-05	2.09989e-05	1.73647e-05	2.45574e-05	0	0	0	0	0	0	1.19043e-05	1.68353e-05	0	0	0	0	0	0	0	0	0
ID_193	0.000611933	0.000195461	0.000343349	9.02699e-05	0.00160024	0.00116792	0	0	0	0	0	0	0	0	0	0	0	0	0	0	0	0	0	0	0	0	1.27018e-05	1.79631e-05	0	0	0	0	0	0	0	0	8.86997e-06	1.2544e-05	0	0	0	0	0	0	0	0	0	0	0
ID_194	0.000151621	0.00012758	8.21276e-05	6.83313e-05	2.27206e-05	3.21317e-05	0.000274186	0.000139229	0.000126233	7.18294e-05	0.000162178	1.57364e-05	9.56074e-05	1.28342e-05	0.000124519	5.16418e-05	0.000185837	3.52626e-05	9.95983e-05	5.42355e-05	0.000284683	5.52951e-05	0.000238677	0.00014585	0.000245731	3.15853e-05	9.91206e-05	5.84858e-05	2.76339e-05	3.90802e-05	2.31691e-05	3.2766e-05	5.24685e-05	3.79853e-05	2.62392e-05	1.96224e-05	2.37138e-05	3.35364e-05	0	0	1.49303e-05	2.11146e-05	1.62052e-05	2.29176e-05	0	0	0	0	1.27018e-05
ID_195	7.96915e-05	5.86072e-05	0.00015577	0.000111046	5.68066e-05	4.06307e-05	0.0160406	0.0115135	6.94572e-05	1.23422e-05	2.59e-05	3.66282e-05	8.64124e-05	4.26156e-05	0	0	3.48678e-05	2.51357e-05	4.32705e-05	3.13823e-05	7.5254e-05	2.80786e-05	3.86608e-05	5.46746e-05	1.15857e-05	1.63847e-05	1.97765e-05	2.79682e-05	5.62992e-05	5.14425e-05	2.81816e-05	2.14805e-05	3.43607e-05	4.85934e-05	4.31281e-05	3.05248e-05	0	0	0	0	0	0	0	0	0	0	0	0	0
ID_196	0.000364776	3.85625e-05	0.000369559	2.56617e-05	0.000313118	5.34348e-05	0.000350783	0.000194127	0.000356409	2.9894e-05	0.000523344	5.04152e-05	0.000389481	0.00019859	0.000430333	3.20856e-05	0.000591835	0.000194574	0.00044648	5.86216e-05	0.000404577	8.8992e-05	0.000560202	0.000195612	0.000364145	3.02825e-05	4.06339e-05	5.7465e-05	0.000175244	0.00011077	0.000167579	9.62218e-05	0.00014739	7.30779e-05	0.000117088	5.27882e-05	7.94101e-05	3.56247e-05	4.19886e-05	5.93808e-05	7.05438e-05	7.05046e-05	0.000158312	0.00013971	4.15084e-05	5.87018e-05	0	0	0
ID_197	0.000189344	6.39772e-05	9.1826e-05	6.92701e-05	0.000128156	2.62617e-05	0.000107831	4.95207e-05	0.000167643	6.46694e-05	0.000355752	0.000244781	0.000148634	5.87497e-05	0.000185602	0.000161373	0.000278997	8.11126e-05	0.000136324	3.19523e-05	0.000337265	4.91019e-05	0.000115768	4.99983e-05	0.000102221	5.64791e-05	7.28742e-05	7.61559e-05	6.87642e-05	1.72051e-05	5.13507e-05	1.51374e-05	1.19239e-05	1.6863e-05	9.20105e-05	5.25628e-05	0	0	2.38087e-05	3.36705e-05	4.2737e-05	3.40871e-05	3.24104e-05	4.58353e-05	3.84069e-05	5.43155e-05	0	0	7.12784e-05
ID_198	4.44879e-05	3.4327e-05	8.21276e-05	6.83313e-05	5.68066e-05	4.06307e-05	0.000832272	0.000170104	0.000575071	0.000192024	0.000691029	0.000217799	0.000715887	0.0001981	0.000546015	9.02503e-05	0.000544933	3.99504e-05	0.000412098	0.000202002	0.000337713	8.90245e-05	0.000753645	2.03539e-05	0.000493834	7.71547e-05	0.000241607	0.00013479	0.000180011	4.95567e-05	0.000244401	3.58648e-05	0.000426011	0.00014571	0.000220773	8.07164e-05	9.41631e-05	6.82599e-05	3.04289e-05	4.3033e-05	2.88336e-05	2.04272e-05	9.36455e-05	6.63628e-05	0.000106319	7.84161e-05	8.5833e-05	6.37821e-05	0.000168744
ID_199	0.000176779	1.62153e-05	0.000108337	3.81859e-05	0.000323099	0.000100562	0.000296481	0.000231301	0.000832806	3.41094e-05	0.00032984	0.000208476	0.000293321	5.9448e-05	0.000354213	0.000196056	0.000435147	3.23353e-05	0.00047422	4.96962e-05	0.000388053	0.000297596	0.000490666	6.54002e-05	0.000545105	7.65836e-05	0.000802772	0.00027329	0.000597754	4.17458e-05	0.000418359	0.000150177	0.000452655	6.50802e-05	0.00053545	6.81501e-05	0.000366264	6.4799e-05	0.000137341	2.48294e-05	0.000361245	6.58758e-05	0.000302874	0.000289677	0.000183133	4.02021e-05	0.000174557	0.00024686	0.000316233
ID_200	0.00127615	0.000306623	0.000978535	0.000155242	0.00111157	8.62195e-05	0	0	2.87282e-05	4.06278e-05	1.22617e-05	1.73406e-05	1.24443e-05	1.75989e-05	6.34363e-05	6.79275e-05	2.51524e-05	1.91162e-05	4.9783e-05	3.82463e-05	3.78512e-05	2.86698e-05	3.86608e-05	5.46746e-05	0	0	3.33212e-05	2.4767e-05	2.62819e-05	3.71682e-05	1.15845e-05	1.6383e-05	3.48311e-05	2.80633e-05	1.05123e-05	1.48666e-05	0	0	0	0	0	0	0	0	0	0	0	0	0
ID_201	0.00015086	9.96763e-06	0.000143033	6.73823e-05	0.000155867	5.58023e-05	5.01632e-05	3.70433e-05	9.53072e-05	7.15423e-05	6.13201e-05	4.58821e-05	2.8138e-05	2.02906e-05	2.40068e-05	1.71918e-05	0.000149835	6.47107e-05	3.75735e-05	5.3137e-05	0.000174077	7.3567e-05	4.04776e-05	5.7244e-05	5.92116e-05	6.08386e-05	4.6023e-05	9.46566e-06	2.96969e-05	4.19978e-05	7.66543e-05	4.68615e-05	2.33775e-05	1.65404e-05	4.78033e-05	1.2222e-05	7.88154e-05	4.51573e-05	0.000110222	4.16201e-05	0.000364636	0.000308706	3.87201e-05	2.8449e-05	8.24636e-05	5.87197e-05	2.54608e-05	3.60071e-05	0.000154232
ID_202	6.11229e-05	4.37267e-05	0.000118189	3.66979e-05	7.63396e-05	5.68428e-05	7.96044e-05	7.31625e-05	5.67762e-05	8.02937e-05	4.90584e-05	3.46895e-05	6.84687e-05	3.73523e-05	4.3573e-05	6.16215e-05	8.92205e-05	7.35867e-05	8.41002e-05	6.02225e-05	4.62417e-05	6.53956e-05	7.50755e-05	5.35726e-05	5.09502e-05	4.26017e-05	1.97765e-05	2.79682e-05	4.11304e-05	3.22791e-05	6.37029e-05	5.7343e-05	0	0	4.31281e-05	3.05248e-05	0.000183135	9.71053e-05	9.62261e-05	2.2538e-05	0.000127599	0.000100585	3.64232e-05	3.57278e-05	6.22626e-05	8.80526e-05	0.000158189	3.98397e-05	4.23819e-05
ID_203	0.0013633	0.000485949	0.00146297	0.000507503	0.000943379	0.000337843	0	0	6.25326e-05	5.35626e-05	3.67967e-05	3.00492e-05	4.05823e-05	3.08266e-05	3.93851e-05	3.2176e-05	2.51524e-05	1.91162e-05	4.89674e-05	6.92504e-05	0	0	1.93304e-05	2.73373e-05	4.00059e-05	2.97881e-05	0	0	0	0	3.03161e-05	2.66673e-05	3.53014e-05	2.92151e-05	2.62392e-05	1.96224e-05	0	0	0	0	0	0	0	0	0	0	0	0	0
ID_204	0.00012494	2.77432e-05	0	0	7.13492e-05	5.5836e-05	0.00062955	0.000179437	0.000746568	0.000527609	0.000151282	6.51794e-05	0.000409172	0.000278145	8.51784e-05	9.09415e-06	0.000280725	7.80462e-05	0.000817166	0.000308156	0.00095492	0.000529841	0.000643202	0.000281014	0.000838258	0.000330083	0.000387117	0.00010655	0.000393681	0.000223648	0.00058654	0.000274336	0.000401162	3.63524e-05	0.000249694	0.000208244	0.000345447	9.8614e-05	5.63294e-05	2.48509e-05	0.000450873	0.000217229	0.000541932	0.000206096	0.00023284	0.000119364	0.000322938	0.000149851	0.000310274
ID_205	0.000592018	0.000141788	0.000395922	5.84241e-05	0.000434899	7.83996e-05	2.0722e-05	2.93053e-05	5.74564e-05	8.12556e-05	0	0	6.42201e-05	4.71782e-05	1.31136e-05	1.85454e-05	0.00016349	9.60454e-05	1.22418e-05	1.73126e-05	5.25816e-05	3.79829e-05	9.82542e-05	0.000104428	1.6193e-05	2.29004e-05	1.35446e-05	1.9155e-05	0	0	8.68236e-06	1.22787e-05	1.19239e-05	1.6863e-05	1.05123e-05	1.48666e-05	1.36478e-05	1.93009e-05	0	0	0	0	3.9578e-05	3.49276e-05	0	0	0	0	0
ID_206	0.00057213	0.000178713	0.00051563	4.96801e-05	0.0005517	5.91427e-05	0.000254678	6.63044e-05	6.54108e-05	9.25048e-05	0.00017717	0.000130565	0.000194716	0.000109508	0.000181294	7.26263e-05	0.000218436	9.03104e-05	0.000124082	3.25834e-05	0.000113554	8.60094e-05	0.000218438	0.00014806	5.92116e-05	6.08386e-05	1.27018e-05	1.79631e-05	5.59788e-05	3.98034e-05	1.73647e-05	2.45574e-05	1.14536e-05	1.61978e-05	2.10245e-05	2.97332e-05	0	0	0	0	1.20572e-05	1.70515e-05	0	0	0	0	0	0	0
ID_207	2.59193e-05	2.04195e-05	2.6363e-05	3.72829e-05	3.08985e-05	4.36971e-05	0.000196155	0.000173812	0.000231343	0.000119934	7.63351e-05	6.34712e-05	0.000206405	0.000141859	8.9619e-05	5.14717e-05	0.000117178	0.000125653	0.000102007	3.44229e-05	0.000178366	0.000125087	9.6652e-05	0.000136687	0.000143822	0.000108092	1.35446e-05	1.9155e-05	8.70277e-05	7.28008e-05	0.000138247	0.000173072	1.19239e-05	1.6863e-05	6.40698e-05	2.56971e-05	3.43747e-05	5.9124e-06	1.52144e-05	2.15165e-05	4.19178e-05	3.67966e-05	0.0004077	0.000200949	2.07542e-05	2.93509e-05	0	0	0
ID_208	6.38173e-05	7.14668e-05	0	0	8.27147e-05	6.38528e-05	0.000187436	0.000118392	1.89254e-05	2.67646e-05	0	0	2.48886e-05	3.51978e-05	1.31136e-05	1.85454e-05	9.71534e-06	1.37396e-05	0	0	0	0	0.000128095	6.05685e-05	0.00036116	0.000451865	0	0	0	0	2.89493e-05	2.16598e-05	2.62342e-05	1.89927e-05	1.5727e-05	2.22413e-05	1.77399e-05	2.50881e-05	0	0	0	0	0	0	2.07542e-05	2.93509e-05	0	0	0
ID_209	0.000281043	0.0001417	0.000472756	0.000146792	0.000430327	0.000275365	0.000178717	7.38083e-05	0.000160038	0.000118686	0.00046473	0.000174814	0.000153329	0.00012206	0.000201024	8.11457e-05	0.000258434	0.000177784	0.000401546	0.000111827	0.000413224	0.000266399	7.61986e-05	2.83609e-05	0.000261613	0.000168638	0.000275295	6.26764e-05	0.000194859	3.89826e-05	0.000181442	0.000100151	0.000197001	6.50118e-05	0.000211615	8.02916e-05	0.000449857	9.33592e-05	8.55401e-05	4.13365e-05	9.93774e-05	8.54217e-05	0.000390987	9.00898e-05	0.000306552	0.000174726	0.000250939	0.000214342	0.000258683
ID_210	4.25544e-05	4.20526e-05	2.78823e-05	3.94316e-05	0.000119978	8.71671e-05	2.94412e-05	4.16362e-05	6.6579e-05	4.83861e-05	2.59e-05	3.66282e-05	3.83322e-05	3.0515e-05	5.89513e-05	4.24173e-05	2.9146e-05	4.12187e-05	3.99818e-05	3.03378e-05	2.31209e-05	3.26978e-05	0	0	2.31715e-05	3.27694e-05	0.000126448	8.32685e-05	0.000109895	3.38918e-05	0.000122968	4.47407e-05	9.96938e-05	7.97467e-06	0.000142953	0.000122165	0.00028847	8.8264e-05	1.19043e-05	1.68353e-05	9.17851e-05	6.9132e-05	1.62052e-05	2.29176e-05	0.000200786	0.00010249	5.09217e-05	7.20141e-05	6.10428e-05
ID_211	0.0011413	0.000230067	0.00134202	0.000135583	0.00154329	3.2127e-05	0.000157995	7.73562e-05	2.18036e-05	3.08349e-05	2.45351e-05	3.46978e-05	3.83322e-05	3.0515e-05	1.08932e-05	1.54054e-05	5.42985e-05	4.79292e-05	3.10286e-05	2.3359e-05	0	0	0	0	2.80995e-05	2.05512e-05	2.62464e-05	1.85877e-05	5.49473e-05	1.69459e-05	3.32183e-05	2.65181e-05	2.67046e-05	1.92044e-05	3.7291e-05	7.02436e-06	0	0	0	0	0	0	0	0	0	0	0	0	0
ID_212	0.000560123	6.16702e-05	0.000829425	5.41967e-05	0.00068124	0.000234988	0	0	1.89254e-05	2.67646e-05	0	0	0	0	0	0	9.71534e-06	1.37396e-05	0	0	0	0	0	0	0	0	0	0	0	0	0	0	0	0	0	0	0	0	0	0	0	0	0	0	0	0	0	0	0
ID_213	0.0008489	0.000275834	0.00105443	9.56942e-05	0.00138603	0.000286161	0.000418385	0.000125777	0.000161206	0.000170704	7.35817e-05	6.00696e-05	7.5219e-05	8.14166e-05	9.38069e-05	6.88697e-05	7.54573e-05	5.73487e-05	0.000110992	5.34936e-05	8.15938e-05	5.82915e-05	3.66293e-05	2.60201e-05	0.000153492	7.03762e-05	0.000357406	0.000105731	0.000261951	0.000110241	0.000610837	0.000556081	0.000372958	0.000210283	0.000810485	0.000766313	0.000134512	2.3318e-05	2.71188e-05	1.95997e-05	0.000133703	3.24829e-05	0.000100309	5.56261e-05	3.84069e-05	5.43155e-05	0.000113827	9.35551e-05	0.000258683
ID_214	7.7758e-05	6.12586e-05	2.78823e-05	3.94316e-05	8.45176e-05	7.65642e-05	7.96044e-05	7.31625e-05	8.1458e-05	5.80294e-05	2.59e-05	3.66282e-05	1.56937e-05	2.21942e-05	1.08932e-05	1.54054e-05	7.60515e-05	4.62226e-05	9.30534e-05	1.60317e-05	0.000491165	0.000305933	0.000132158	7.2732e-05	0.00011682	9.95617e-05	1.97765e-05	2.79682e-05	4.00988e-05	3.22028e-05	3.3986e-05	2.8397e-05	1.47807e-05	2.0903e-05	5.35576e-05	3.95645e-05	2.55047e-05	1.81674e-05	0	0	2.78067e-05	3.93247e-05	0.00019267	0.0002264	2.07542e-05	2.93509e-05	0	0	4.23819e-05
ID_215	0.00122759	0.000317166	0.00109551	0.000271494	0.00151599	0.000363492	2.82271e-05	3.99191e-05	0	0	2.45351e-05	3.46978e-05	1.56937e-05	2.21942e-05	3.71648e-05	3.23319e-05	0	0	0	0	0	0	0	0	1.15857e-05	1.63847e-05	0	0	1.38169e-05	1.95401e-05	1.08169e-05	1.52974e-05	0	0	1.5727e-05	2.22413e-05	0	0	0	0	0	0	8.10261e-06	1.14588e-05	0	0	0	0	0
ID_216	0.000118176	7.51333e-05	8.19744e-05	6.62595e-05	7.95272e-05	1.00967e-05	0	0	6.94572e-05	1.23422e-05	7.35934e-05	6.00984e-05	0.000113551	6.04279e-05	6.55678e-05	9.27268e-05	3.48678e-05	2.51357e-05	6.20572e-05	4.67179e-05	4.41911e-05	6.24956e-05	5.88996e-05	4.7367e-05	0.000185878	8.09211e-05	7.85013e-05	3.18948e-05	5.62992e-05	5.14425e-05	6.50697e-05	3.19308e-05	7.63163e-05	8.8208e-06	0.000121306	6.53005e-05	3.91525e-05	3.35259e-05	2.92106e-05	2.07089e-05	8.5474e-05	6.81742e-05	6.3028e-05	4.97208e-05	3.84069e-05	5.43155e-05	3.49113e-05	4.93721e-05	0.000168744
ID_217	0.00085988	0.0002237	0.00074185	0.000253202	0.00102206	0.000198361	0	0	2.18036e-05	3.08349e-05	2.59e-05	3.66282e-05	0	0	1.08932e-05	1.54054e-05	1.94307e-05	2.74791e-05	3.42849e-05	2.45754e-05	0	0	0	0	0	0	1.97765e-05	2.79682e-05	0	0	0	0	0	0	1.05123e-05	1.48666e-05	0	0	0	0	0	0	0	0	0	0	0	0	0
ID_218	0.00058332	0.000131283	0.00058654	0.000148031	0.000585786	0.000126726	0	0	2.87282e-05	4.06278e-05	0	0	0	0	0	0	9.71534e-06	1.37396e-05	1.22418e-05	1.73126e-05	0	0	0	0	0	0	1.27018e-05	1.79631e-05	0	0	0	0	0	0	0	0	0	0	0	0	0	0	0	0	0	0	0	0	0
ID_219	1.66351e-05	2.35255e-05	0	0	7.13492e-05	5.5836e-05	5.01632e-05	3.70433e-05	1.89254e-05	2.67646e-05	0	0	5.50251e-05	1.85593e-05	3.71648e-05	3.23319e-05	6.06144e-05	2.5917e-05	7.75553e-05	2.7192e-05	0	0	3.75378e-05	2.67863e-05	2.80995e-05	2.05512e-05	0.000298646	0.000173732	6.87642e-05	1.72051e-05	0.000257377	0.000102913	8.77699e-05	1.28918e-05	0.000102523	4.87388e-05	0.000209564	0.000134218	9.95363e-05	4.53513e-05	0.000374074	0.00020122	0.000306456	0.000111931	0.000208984	0.000162584	0.000569136	0.000467775	0.000444818
ID_220	2.59193e-05	2.04195e-05	1.80307e-05	2.54992e-05	0	0	0.000143564	0.000106318	9.12608e-05	3.04412e-05	7.49584e-05	1.9387e-06	0.000148634	5.87497e-05	8.95745e-05	0.000104425	4.05895e-05	3.86691e-05	4.32705e-05	3.13823e-05	6.09721e-05	5.7864e-05	7.61986e-05	2.83609e-05	2.77788e-05	2.0437e-05	2.54036e-05	3.59261e-05	0	0	1.08169e-05	1.52974e-05	0	0	2.15641e-05	1.52624e-05	2.55047e-05	1.81674e-05	0	0	1.20572e-05	1.70515e-05	1.93601e-05	1.42245e-05	0	0	8.83665e-05	6.46278e-05	1.27018e-05
ID_221	0.0017438	0.000515612	0.00237799	0.000217779	0.00236807	0.000243353	2.94412e-05	4.16362e-05	4.76536e-05	3.57712e-05	0	0	1.24443e-05	1.75989e-05	0	0	8.00993e-05	0.000113278	1.22418e-05	1.73126e-05	1.47304e-05	2.08319e-05	3.66293e-05	2.60201e-05	3.50779e-05	2.83828e-05	4.68658e-05	3.4328e-05	8.12292e-05	5.40817e-05	3.24507e-05	4.58922e-05	4.4342e-05	6.2709e-05	2.10245e-05	2.97332e-05	0	0	0	0	0	0	0	0	0	0	0	0	0
ID_222	0.000691213	0.000325368	0.00062564	0.000151553	0.00029995	0.000155254	0	0	6.94572e-05	1.23422e-05	5.04234e-05	3.56945e-05	7.29689e-05	4.82926e-05	7.65499e-05	5.73962e-05	0.000104658	5.60089e-05	5.87362e-05	5.90323e-05	0.000127836	1.1332e-05	7.32587e-05	5.20402e-05	3.93645e-05	2.91175e-05	1.27018e-05	1.79631e-05	4.11304e-05	3.22791e-05	3.32183e-05	2.65181e-05	1.47807e-05	2.0903e-05	0	0	0	0	0	0	1.39034e-05	1.96623e-05	1.12575e-05	1.59204e-05	0	0	0	0	0
ID_223	9.28428e-06	1.31299e-05	0	0	0	0	0	0	2.18036e-05	3.08349e-05	0.000137632	0.00010587	3.73329e-05	5.27967e-05	1.31136e-05	1.85454e-05	0.000152046	0.000139912	6.44655e-05	6.13041e-05	6.05236e-05	4.62332e-05	0	0	0.000136211	9.66611e-05	1.97765e-05	2.79682e-05	0	0	1.15845e-05	1.6383e-05	2.67046e-05	1.92044e-05	1.5727e-05	2.22413e-05	0	0	1.19043e-05	1.68353e-05	0	0	0	0	0	0	0	0	0
ID_224	0.000311004	1.17978e-05	0.000172281	7.82066e-05	0.00190668	0.00222664	2.82271e-05	3.99191e-05	5.05318e-05	3.67241e-05	0	0	1.34436e-05	1.90121e-05	6.11716e-05	1.6385e-05	5.48926e-05	6.11138e-06	2.774e-05	2.00164e-05	0	0	0	0	3.53987e-05	2.91683e-05	2.70893e-05	3.831e-05	0	0	0	0	0	0	1.10518e-05	1.56296e-05	0	0	0	0	1.39034e-05	1.96623e-05	0	0	0	0	3.49113e-05	4.93721e-05	0
ID_225	0.000470973	0.000173855	0.000641368	0.0003972	0.000477142	0.000433943	4.8949e-05	3.58119e-05	5.05318e-05	3.67241e-05	7.63234e-05	6.34717e-05	5.2775e-05	5.05873e-05	5.89513e-05	4.24173e-05	9.71534e-06	1.37396e-05	6.85697e-05	4.91507e-05	4.41911e-05	6.24956e-05	5.77766e-05	4.97488e-05	5.19124e-05	4.38106e-05	4.68658e-05	3.4328e-05	5.49473e-05	1.69459e-05	3.3986e-05	2.8397e-05	0	0	1.05123e-05	1.48666e-05	0	0	0	0	0	0	0	0	0	0	0	0	0
ID_226	0.000494169	0.000164451	0.000486075	0.00012866	0.000390842	0.000163322	0	0	0	0	1.22617e-05	1.73406e-05	0	0	3.71203e-05	3.22746e-05	4.05895e-05	3.86691e-05	0	0	0	0	1.93304e-05	2.73373e-05	0	0	0	0	0	0	0	0	1.19239e-05	1.6863e-05	2.67788e-05	1.97823e-05	0	0	0	0	0	0	0	0	0	0	0	0	0
ID_227	0.00037406	5.14189e-05	0.000350009	9.30391e-05	0.000810243	0.000284757	0	0	2.18036e-05	3.08349e-05	0	0	1.56937e-05	2.21942e-05	1.31136e-05	1.85454e-05	0	0	2.774e-05	2.00164e-05	5.21331e-05	4.61518e-05	0	0	6.01648e-05	6.21503e-05	3.33212e-05	2.4767e-05	1.48485e-05	2.09989e-05	1.73647e-05	2.45574e-05	0	0	0	0	0	0	0	0	0	0	0	0	0	0	0	0	0
ID_228	0.00055412	7.92511e-05	0.000416991	7.65548e-05	0.000587589	0.000112255	2.82271e-05	3.99191e-05	1.89254e-05	2.67646e-05	0	0	2.58879e-05	1.83464e-05	1.31136e-05	1.85454e-05	9.71534e-06	1.37396e-05	1.87868e-05	2.65685e-05	0	0	2.02388e-05	2.8622e-05	1.15857e-05	1.63847e-05	1.27018e-05	1.79631e-05	1.48485e-05	2.09989e-05	0	0	1.19239e-05	1.6863e-05	0	0	0	0	0	0	0	0	0	0	0	0	0	0	0
ID_229	4.64214e-05	6.56497e-05	0.000126368	6.3667e-05	0.000133146	4.40122e-05	2.82271e-05	3.99191e-05	4.0729e-05	2.90147e-05	3.81617e-05	3.17359e-05	7.62182e-05	8.09626e-05	5.02783e-05	2.03606e-05	1.94307e-05	2.74791e-05	6.53135e-05	3.37582e-05	3.78512e-05	2.86698e-05	0.000110796	3.8946e-05	4.42925e-05	4.01252e-05	1.35446e-05	1.9155e-05	1.38169e-05	1.95401e-05	5.27176e-05	3.17608e-05	2.62342e-05	1.89927e-05	7.92573e-05	4.57048e-05	5.51015e-05	1.23999e-05	2.71188e-05	1.95997e-05	6.97245e-05	2.38584e-05	3.55653e-05	2.97979e-05	5.91611e-05	4.70897e-05	0.000202194	0.000156723	9.07228e-05
ID_230	4.64214e-05	6.56497e-05	7.37954e-05	6.97041e-05	2.59081e-05	3.66396e-05	5.01632e-05	3.70433e-05	6.6579e-05	4.83861e-05	0.000111743	5.10674e-05	8.21638e-05	3.04636e-05	8.73542e-05	8.1796e-05	3.48678e-05	2.51357e-05	6.53135e-05	3.37582e-05	2.31209e-05	3.26978e-05	0.000131944	5.33963e-05	1.19065e-05	1.68383e-05	3.24783e-05	2.45458e-05	4.11304e-05	3.22791e-05	9.90557e-05	6.03188e-05	0	0	4.36677e-05	4.1503e-05	0	0	1.39962e-05	1.97936e-05	2.59606e-05	1.84956e-05	0	0	2.07542e-05	2.93509e-05	3.49113e-05	4.93721e-05	0
ID_232	0.000840963	0.000233238	0.000530776	0.000137536	0.000605308	0.000198554	0.00034899	0.000375625	9.53072e-05	7.15423e-05	2.45351e-05	3.46978e-05	7.07188e-05	2.42422e-05	7.42851e-05	6.31163e-06	1.54371e-05	2.18314e-05	2.774e-05	2.00164e-05	6.68635e-05	4.82698e-05	5.68682e-05	3.68713e-06	8.3657e-05	4.60144e-05	1.27018e-05	1.79631e-05	5.83623e-05	5.5852e-05	1.08169e-05	1.52974e-05	2.62342e-05	1.89927e-05	6.52317e-05	5.4164e-05	0	0	0	0	0	0	0	0	0	0	0	0	0
ID_233	0.00101909	0.000206128	0.000922617	0.000173161	0.000992953	0.000424332	2.82271e-05	3.99191e-05	2.18036e-05	3.08349e-05	5.04234e-05	3.56945e-05	2.8138e-05	2.02906e-05	2.40068e-05	1.71918e-05	5.0899e-05	3.83656e-05	2.44837e-05	3.46252e-05	2.31209e-05	3.26978e-05	7.91384e-05	5.60035e-05	2.34922e-05	1.66161e-05	2.62464e-05	1.85877e-05	0	0	8.68236e-06	1.22787e-05	4.10149e-05	3.65095e-05	2.62392e-05	1.96224e-05	0	0	0	0	0	0	0	0	0	0	0	0	0
ID_234	1.85686e-05	2.62599e-05	2.78823e-05	3.94316e-05	5.36191e-05	3.92151e-05	0	0	0	0	2.59e-05	3.66282e-05	0	0	0	0	1.94307e-05	2.74791e-05	1.87868e-05	2.65685e-05	2.31209e-05	3.26978e-05	0	0	1.15857e-05	1.63847e-05	0	0	6.63807e-05	6.67471e-05	3.18514e-05	2.86715e-05	0	0	4.25058e-05	3.90863e-05	6.87493e-05	1.18248e-05	5.75477e-05	5.79944e-05	8.07548e-05	3.33334e-05	9.22065e-05	5.72315e-05	0	0	0	0	2.54036e-05
ID_235	0	0	0	0	0	0	0	0	0	0	0	0	0	0	0	0	0	0	0	0	0	0	0	0	0	0	0	0	0	0	0	0	0	0	0	0	0	0	1.39962e-05	1.97936e-05	0	0	0	0	0	0	0	0	1.27018e-05
ID_236	0.00181301	0.000224345	0.00126323	0.000170111	0.00101611	0.000169966	0.000148061	4.28162e-05	0.00015784	1.9123e-05	0.000226228	0.000108132	0.000268238	0.00024345	0.000285995	9.95077e-05	0.000290494	5.27228e-05	0.000223583	0.000179017	0.000339764	0.000108752	0.000175576	8.75674e-05	0.000341295	4.65208e-05	0.000243897	6.10086e-05	0.000468885	0.000126569	0.000289972	6.66805e-05	0.000543316	0.000158864	0.000368125	0.000232674	0.000134512	2.3318e-05	0.000112314	7.26665e-05	2.41144e-05	3.41029e-05	0.000106696	8.93936e-05	0.000153628	0.000217262	0.000265457	0.000112426	0.000234719
ID_237	8.04524e-05	5.94789e-05	0	0	2.27206e-05	3.21317e-05	5.76683e-05	4.08047e-05	1.89254e-05	2.67646e-05	0.000331088	0.000369062	2.48886e-05	3.51978e-05	0.000100557	4.07212e-05	0.000184648	8.89775e-05	7.67074e-05	7.79504e-05	6.09721e-05	5.7864e-05	3.86608e-05	5.46746e-05	0.000306226	0.000195935	5.95676e-05	1.76218e-05	2.76339e-05	3.90802e-05	1.08169e-05	1.52974e-05	0	0	0	0	8.86997e-06	1.2544e-05	0	0	0	0	0	0	2.07542e-05	2.93509e-05	0	0	0
ID_238	0.000800894	0.000187123	0.000637594	0.000165092	0.000597559	0.00025954	2.94412e-05	4.16362e-05	0	0	3.67967e-05	3.00492e-05	1.34436e-05	1.90121e-05	2.62271e-05	3.70907e-05	8.6361e-05	6.15461e-05	1.54981e-05	2.19176e-05	3.78512e-05	2.86698e-05	1.72989e-05	2.44644e-05	2.34922e-05	1.66161e-05	1.27018e-05	1.79631e-05	0	0	1.94993e-05	1.40337e-05	1.14536e-05	1.61978e-05	0	0	0	0	0	0	0	0	1.93601e-05	1.42245e-05	0	0	0	0	0.000116126
ID_239	0.000140228	4.81051e-05	0.000136373	0.0001036	0.000355372	8.7133e-05	0.000131837	0.000131203	0.000177445	0.000122095	0.000265779	0.00014251	0.000328209	0.000182454	9.18837e-05	6.69535e-05	0.000711827	0.000386686	0.000182851	3.50965e-05	0.000104715	2.6344e-05	0.000431767	4.77242e-05	0.000611109	0.000345615	3.33212e-05	2.4767e-05	0.00165824	0.00184396	0.000140956	6.56128e-05	0.000144062	8.4254e-05	0.000155541	3.13196e-05	0.000133316	7.15219e-05	9.2916e-05	3.42991e-05	0.00016069	1.94695e-05	0.00016735	6.45114e-05	0	0	8.5833e-05	6.37821e-05	9.6682e-05
ID_240	0.00161058	0.000388137	0.00114626	6.96694e-05	0.00160827	0.000135708	5.88824e-05	8.32723e-05	4.76536e-05	3.57712e-05	5.04351e-05	3.57022e-05	1.56937e-05	2.21942e-05	3.71648e-05	3.23319e-05	5.42985e-05	4.79292e-05	1.22418e-05	1.73126e-05	0.000159347	8.40762e-05	3.75378e-05	2.67863e-05	4.85791e-05	6.87012e-05	3.97911e-05	3.31988e-05	2.96969e-05	4.19978e-05	3.18514e-05	2.86715e-05	0	0	3.20763e-05	2.5761e-05	0	0	0	0	0	0	0	0	0	0	0	0	0
ID_241	0.000509457	0.000178601	0.000426996	0.000186199	0.000655332	0.000198759	2.82271e-05	3.99191e-05	0	0	0	0	0	0	2.40068e-05	1.71918e-05	9.71534e-06	1.37396e-05	0	0	0	0	0	0	0	0	0	0	0	0	1.08169e-05	1.52974e-05	0	0	0	0	0	0	0	0	0	0	0	0	0	0	0	0	0
ID_242	0	0	0	0	0	0	5.76683e-05	4.08047e-05	0	0	3.81617e-05	3.17359e-05	4.03307e-05	5.70362e-05	3.93851e-05	3.2176e-05	1.94307e-05	2.74791e-05	2.774e-05	2.00164e-05	1.47304e-05	2.08319e-05	0	0	0	0	0.000242341	0.0002112	0.000274736	8.47294e-05	0.000158273	0.000127635	2.67046e-05	1.92044e-05	0.000100904	6.29357e-05	2.07269e-05	1.51058e-05	6.61419e-05	4.7215e-05	8.36279e-05	3.65605e-05	6.78986e-05	7.34482e-05	3.84069e-05	5.43155e-05	0.00010035	9.32732e-05	0.000110167
ID_243	0.000425695	0.00019177	0.000183652	0.00013854	0.000224039	0.000123713	7.08851e-05	5.22345e-05	0.000122867	8.74247e-05	0.000100858	3.85668e-05	2.8138e-05	2.02906e-05	7.43296e-05	6.46637e-05	0	0	3.67255e-05	5.19378e-05	0	0	1.72989e-05	2.44644e-05	0.000581921	0.00027662	0.000152456	5.4885e-05	0.000214154	0.000113401	7.08499e-05	5.48794e-06	0.000146422	9.42256e-05	4.83428e-05	1.42202e-05	4.14538e-05	3.02116e-05	1.52144e-05	2.15165e-05	1.20572e-05	1.70515e-05	3.87201e-05	2.8449e-05	0	0	3.49113e-05	4.93721e-05	9.07228e-05
ID_244	0.000991822	0.00022468	0.000975343	0.000115385	0.000923427	8.26084e-05	5.76683e-05	4.08047e-05	8.55044e-05	6.95381e-05	2.45351e-05	3.46978e-05	0.00013069	7.25507e-05	0.000122343	3.277e-05	0.000113779	5.26793e-05	5.87686e-05	1.1136e-05	0.000127387	6.90481e-05	0.00013713	0.000118893	1.6193e-05	2.29004e-05	5.87248e-05	1.45305e-05	0	0	6.37029e-05	5.7343e-05	6.15357e-05	1.22122e-05	8.97695e-05	4.43812e-05	0	0	0	0	0	0	3.64232e-05	3.57278e-05	0	0	0	0	0
ID_245	0.000125527	4.96512e-05	0.000197125	8.13771e-05	0.000162242	6.93257e-05	5.88824e-05	8.32723e-05	7.85798e-05	7.01571e-05	1.22617e-05	1.73406e-05	8.31631e-05	8.15345e-06	3.93851e-05	3.2176e-05	6.06144e-05	2.5917e-05	8.73889e-05	9.87623e-05	8.83822e-05	0.000124991	5.18968e-05	7.33932e-05	0.000114769	2.00867e-05	0	0	1.48485e-05	2.09989e-05	1.15845e-05	1.6383e-05	1.14536e-05	1.61978e-05	0	0	0	0	0	0	0	0	0	0	0	0	0	0	0
ID_246	8.97367e-05	5.22823e-05	9.8639e-05	4.37952e-05	9.26956e-05	0.000131091	0.000112329	0.000102926	0.000174567	0.000121924	3.81617e-05	3.17359e-05	9.66067e-05	1.89915e-05	3.93851e-05	3.2176e-05	0	0	7.10104e-05	2.79861e-05	0.00235105	0.00250252	3.95692e-05	2.80018e-05	0.000293366	0.000272465	0	0	6.77327e-05	5.13712e-05	3.47536e-05	4.9149e-05	1.14536e-05	1.61978e-05	2.62392e-05	1.96224e-05	1.77399e-05	2.50881e-05	0	0	5.76673e-05	4.08544e-05	0.000144835	9.02718e-05	6.4811e-05	5.39884e-05	0	0	6.10428e-05
ID_247	0.000557429	0.000163951	0.000606243	0.000242828	0.000463995	7.13515e-05	0	0	1.89254e-05	2.67646e-05	0	0	0	0	1.31136e-05	1.85454e-05	0	0	0	0	0	0	0	0	0	0	0	0	0	0	0	0	0	0	0	0	0	0	0	0	0	0	0	0	0	0	0	0	0
ID_248	0.000147376	0.000114286	2.6363e-05	3.72829e-05	5.68066e-05	4.06307e-05	0.00019701	7.68844e-05	0.000347094	0.000276997	0.00018809	5.51955e-05	0.000489928	0.000213704	6.33474e-05	6.78043e-05	0.000381931	0.000352282	0.000225241	8.90672e-05	0.00129673	0.000877274	0.000464548	0.000156796	0.000342704	0.000103148	9.12031e-05	3.58017e-05	4.00988e-05	3.22028e-05	0.000178444	0.000127741	6.43924e-05	2.18171e-05	8.46376e-05	9.71984e-05	0	0	0	0	1.39034e-05	1.96623e-05	8.10261e-06	1.14588e-05	0	0	0	0	0
ID_249	0.000482951	0.000111556	0.000477896	5.01426e-05	0.000371717	0.000224779	0	0	2.18036e-05	3.08349e-05	1.22617e-05	1.73406e-05	1.24443e-05	1.75989e-05	1.08932e-05	1.54054e-05	0	0	0	0	0	0	0	0	1.19065e-05	1.68383e-05	0	0	0	0	8.68236e-06	1.22787e-05	3.81582e-05	4.4104e-06	0	0	0	0	0	0	0	0	0	0	0	0	0	0	0
ID_250	9.28428e-06	1.31299e-05	0	0	0	0	2.94412e-05	4.16362e-05	1.89254e-05	2.67646e-05	1.22617e-05	1.73406e-05	4.38316e-05	3.87151e-05	0	0	0	0	3.10286e-05	2.3359e-05	0	0	0	0	0.000420692	0.00053605	0	0	0	0	3.18514e-05	2.86715e-05	1.14536e-05	1.61978e-05	4.25058e-05	3.90863e-05	0	0	1.52144e-05	2.15165e-05	5.56135e-05	7.86493e-05	3.87201e-05	2.8449e-05	0.000195136	0.000194667	2.54608e-05	3.60071e-05	0
ID_251	3.52036e-05	2.50051e-05	2.78823e-05	3.94316e-05	2.59081e-05	3.66396e-05	0.00015678	2.31366e-05	0.000172719	7.16506e-05	0.00030667	0.000291887	0.000191215	2.56684e-05	0.00010248	9.48942e-05	0.000203485	0.000155953	0.000275872	4.31141e-05	0.000278792	5.08911e-05	0.000309211	0.000189075	0.000331313	0.000194624	0.000175569	0.000100653	8.59962e-05	6.09265e-05	7.08499e-05	5.48794e-06	0	0	1.5727e-05	2.22413e-05	4.62316e-05	1.85605e-05	8.76319e-05	6.21266e-05	8.2601e-05	5.96702e-05	7.74403e-05	5.68979e-05	0.000108868	0.000112836	6.29056e-05	4.68399e-05	0.000109384
ID_252	0.00259088	0.000870685	0.00328457	0.000773307	0.00317604	0.000894309	0	0	5.05318e-05	3.67241e-05	1.22617e-05	1.73406e-05	2.91372e-05	2.07866e-05	3.71203e-05	3.22746e-05	1.94307e-05	2.74791e-05	1.22418e-05	1.73126e-05	2.31209e-05	3.26978e-05	1.72989e-05	2.44644e-05	3.96852e-05	6.30115e-06	0	0	1.38169e-05	1.95401e-05	1.15845e-05	1.6383e-05	1.14536e-05	1.61978e-05	2.15641e-05	1.52624e-05	0	0	0	0	0	0	0	0	0	0	0	0	0
ID_253	0.0010419	6.94184e-05	0.000765787	0.000248164	0.00100114	0.000132634	0	0	2.87282e-05	4.06278e-05	0	0	0	0	0	0	9.71534e-06	1.37396e-05	0	0	0	0	1.72989e-05	2.44644e-05	0	0	0	0	0	0	1.15845e-05	1.6383e-05	1.19239e-05	1.6863e-05	1.05123e-05	1.48666e-05	0	0	0	0	0	0	0	0	0	0	0	0	0
ID_254	1.85686e-05	2.62599e-05	7.37954e-05	6.97041e-05	2.59081e-05	3.66396e-05	0	0	2.18036e-05	3.08349e-05	0	0	0	0	0	0	9.71534e-06	1.37396e-05	2.774e-05	2.00164e-05	2.31209e-05	3.26978e-05	0	0	2.31715e-05	3.27694e-05	1.27018e-05	1.79631e-05	0	0	2.16338e-05	3.05948e-05	3.57718e-05	5.05889e-05	9.55238e-05	6.74141e-05	4.80224e-05	2.42235e-05	0	0	1.39034e-05	1.96623e-05	8.10261e-06	1.14588e-05	0	0	0	0	1.27018e-05
ID_255	0	0	0	0	0	0	0	0	0	0	0	0	0	0	0	0	0	0	0	0	0	0	0	0	0	0	0	0	0	0	0	0	2.33775e-05	1.65404e-05	0	0	2.37138e-05	3.35364e-05	1.39962e-05	1.97936e-05	2.78067e-05	3.93247e-05	3.64232e-05	3.57278e-05	3.84069e-05	5.43155e-05	2.54608e-05	3.60071e-05	1.27018e-05
ID_256	0.000380035	0.000174693	0.000238051	0.000191335	0.000537136	0.000343412	0	0	0	0	3.81617e-05	3.17359e-05	0	0	6.33919e-05	2.17168e-05	0	0	1.22418e-05	1.73126e-05	0	0	7.52901e-05	7.29252e-05	2.77788e-05	2.0437e-05	1.35446e-05	1.9155e-05	0	0	2.24014e-05	1.58681e-05	2.33775e-05	1.65404e-05	1.05123e-05	1.48666e-05	0	0	0	0	0	0	0	0	0	0	0	0	0
ID_257	0.000105611	7.50153e-05	0.000151212	0.000107263	0.000141324	9.67845e-05	0.000218946	6.50391e-05	4.0729e-05	2.90147e-05	3.67967e-05	3.00492e-05	2.48886e-05	3.51978e-05	4.8058e-05	3.44233e-05	0	0	8.65085e-05	2.24432e-05	1.47304e-05	2.08319e-05	7.823e-05	7.2096e-05	0	0	3.24783e-05	2.45458e-05	1.48485e-05	2.09989e-05	1.15845e-05	1.6383e-05	0	0	1.10518e-05	1.56296e-05	0	0	0	0	0	0	8.10261e-06	1.14588e-05	0	0	0	0	0
ID_258	9.28428e-06	1.31299e-05	2.78823e-05	3.94316e-05	2.27206e-05	3.21317e-05	2.94412e-05	4.16362e-05	2.18036e-05	3.08349e-05	0	0	4.7081e-05	6.65826e-05	5.02783e-05	2.03606e-05	1.54371e-05	2.18314e-05	8.32523e-05	4.51872e-05	0.000148906	8.40352e-05	7.32587e-05	5.20402e-05	3.50779e-05	2.83828e-05	3.33212e-05	2.4767e-05	8.12292e-05	5.40817e-05	1.08169e-05	1.52974e-05	7.63163e-05	8.8208e-06	2.21036e-05	3.12592e-05	4.09433e-05	5.79026e-05	2.92106e-05	2.07089e-05	8.17817e-05	7.13231e-06	3.55653e-05	2.97979e-05	4.40567e-05	6.23056e-05	0	0	4.8341e-05
ID_259	0.000632435	0.000235983	0.000618674	0.000220587	0.00109119	0.000542776	2.94412e-05	4.16362e-05	6.94572e-05	1.23422e-05	0	0	2.58879e-05	1.83464e-05	2.62715e-05	3.71536e-05	2.9146e-05	4.12187e-05	3.42849e-05	2.45754e-05	0	0	3.66293e-05	2.60201e-05	3.2386e-05	4.58008e-05	1.27018e-05	1.79631e-05	2.62819e-05	3.71682e-05	8.68236e-06	1.22787e-05	2.38479e-05	3.3726e-05	4.36677e-05	4.1503e-05	1.18569e-05	1.67682e-05	0	0	0	0	1.12575e-05	1.59204e-05	0	0	3.49113e-05	4.93721e-05	1.27018e-05
ID_260	1.85686e-05	2.62599e-05	0.000100158	4.85566e-05	8.27147e-05	6.38528e-05	2.0722e-05	2.93053e-05	3.78508e-05	5.35292e-05	6.40617e-05	6.6309e-05	8.21638e-05	3.04636e-05	0.000120078	3.45619e-05	6.63361e-05	5.68921e-05	8.97972e-05	3.06373e-05	1.47304e-05	2.08319e-05	2.02388e-05	2.8622e-05	0.000103825	8.76212e-05	2.62464e-05	1.85877e-05	0.000127127	4.06012e-05	7.3728e-05	6.41066e-05	0.000132609	8.6676e-05	6.46922e-05	4.57872e-05	0.000166585	8.48658e-05	5.30193e-05	1.31007e-05	2.69875e-05	1.94047e-05	9.22065e-05	5.72315e-05	0.000144726	3.05364e-05	0.000489085	7.73538e-05	0.000316233
ID_261	0.000803588	0.000299447	0.000730786	5.95869e-05	0.00107112	4.3832e-05	0.000240882	0.00011893	0.000232373	0.000104863	0.000186725	7.83411e-05	0.00015683	0.000128582	0.000122254	9.65502e-05	0.000305392	0.000124397	0.000198316	5.77422e-05	0.000272452	0.000103473	0.000331481	0.000150609	0.000187161	5.97617e-05	0.000286787	0.000138245	0.000176916	0.000152905	0.000312349	4.28892e-05	0.0003683	0.000197808	0.000161378	5.6287e-05	0.000208367	0.000162384	0.00018374	6.7388e-05	0.000155406	8.29895e-05	0.000194028	0.00019868	4.40567e-05	6.23056e-05	0.000176733	0.000129256	8.04873e-05
ID_262	0	0	1.80307e-05	2.54992e-05	3.08985e-05	4.36971e-05	0	0	3.78508e-05	5.35292e-05	2.45233e-05	3.46812e-05	5.50251e-05	1.85593e-05	1.31136e-05	1.85454e-05	0.000144653	2.27053e-05	8.41002e-05	6.02225e-05	2.94607e-05	4.16638e-05	0	0	5.1271e-05	1.39275e-05	0.000125367	4.16229e-05	8.46442e-05	3.78573e-05	3.97662e-05	8.76779e-06	3.81582e-05	4.4104e-06	1.5727e-05	2.22413e-05	2.07269e-05	1.51058e-05	6.70155e-05	1.59574e-05	3.80178e-05	2.96492e-05	2.25149e-05	3.18409e-05	0	0	3.49113e-05	4.93721e-05	0
ID_263	0	0	0	0	0	0	0	0	0	0	1.22617e-05	1.73406e-05	0	0	0	0	0	0	0	0	0	0	2.02388e-05	2.8622e-05	1.6193e-05	2.29004e-05	1.35446e-05	1.9155e-05	2.76339e-05	3.90802e-05	8.68236e-06	1.22787e-05	0	0	1.10518e-05	1.56296e-05	2.37138e-05	3.35364e-05	0.000127529	7.1439e-05	0.000102458	9.24146e-05	4.45258e-05	3.48058e-05	4.40567e-05	6.23056e-05	0	0	8.39802e-05
ID_264	0	0	0	0	0	0	0.00011862	8.41682e-05	8.43362e-05	8.24477e-05	6.26968e-05	1.83985e-05	8.76633e-05	7.74303e-05	0.000109185	2.20919e-05	4.51773e-05	1.26519e-05	8.32199e-05	6.00493e-05	7.48055e-05	0.000105791	3.95692e-05	2.80018e-05	3.96852e-05	6.30115e-06	1.97765e-05	2.79682e-05	0	0	1.08169e-05	1.52974e-05	5.00821e-05	1.57131e-05	1.10518e-05	1.56296e-05	2.37138e-05	3.35364e-05	0	0	0	0	0	0	3.84069e-05	5.43155e-05	3.49113e-05	4.93721e-05	4.23819e-05
ID_265	0.000610789	5.77355e-05	0.00047653	0.000111613	0.00044488	0.000149765	0.000177502	7.02151e-06	0.000205493	5.43395e-05	0.000224887	6.04069e-05	0.000260934	4.24349e-05	0.000166124	8.59525e-05	0.000388242	8.02561e-05	0.000285738	0.000117615	0.000130335	0.000154133	0.000268859	0.000111269	0.000240803	3.48051e-05	0.000144301	6.71429e-05	8.22607e-05	6.45581e-05	4.84485e-05	2.1017e-05	0.000128785	4.36342e-05	0.000112413	3.50776e-05	2.95968e-05	2.21337e-05	0	0	0	0	2.83206e-05	4.00514e-05	4.40567e-05	6.23056e-05	0	0	0
ID_266	0.000350249	0.00016049	0.000308501	0.000113596	0.000644814	0.000322132	2.82271e-05	3.99191e-05	0	0	0	0	0	0	2.62715e-05	3.71536e-05	0	0	2.774e-05	2.00164e-05	1.47304e-05	2.08319e-05	2.02388e-05	2.8622e-05	2.31715e-05	3.27694e-05	3.24783e-05	2.45458e-05	0	0	2.81816e-05	2.14805e-05	1.19239e-05	1.6863e-05	1.5727e-05	2.22413e-05	0	0	0	0	0	0	0	0	0	0	0	0	0
ID_267	0.000453165	3.78098e-05	0.000369712	0.00011084	0.000588963	9.2031e-05	0	0	0	0	0	0	0	0	1.08932e-05	1.54054e-05	0	0	0	0	1.47304e-05	2.08319e-05	0	0	1.15857e-05	1.63847e-05	1.35446e-05	1.9155e-05	0	0	0	0	0	0	0	0	0	0	0	0	0	0	0	0	0	0	2.54608e-05	3.60071e-05	0
ID_268	3.65508e-05	3.39562e-05	5.27259e-05	7.45657e-05	9.08822e-05	0.000128527	2.0722e-05	2.93053e-05	5.96544e-05	4.6536e-05	2.45233e-05	3.46812e-05	0.000103803	8.5035e-05	0.000109185	2.20919e-05	5.60266e-05	5.98196e-05	4.32381e-05	3.82407e-05	2.31209e-05	3.26978e-05	4.04776e-05	5.7244e-05	0.000214949	0.000182082	0.000237189	8.65131e-05	0.000585289	2.94887e-05	0.000143259	0.000119985	7.63163e-05	8.8208e-06	0.000102523	4.87388e-05	3.13877e-05	2.27533e-05	4.1115e-05	4.10083e-06	1.39034e-05	1.96623e-05	4.76807e-05	2.66434e-05	8.81135e-05	0.000124611	7.23561e-05	5.12575e-05	3.56392e-05
ID_269	0.000408852	0.000181146	0.000755047	0.000252878	0.000323099	0.000100562	0	0	0	0	2.59e-05	3.66282e-05	0	0	0	0	0	0	0	0	0	0	0	0	0	0	0	0	4.00988e-05	3.22028e-05	0	0	2.62342e-05	1.89927e-05	0	0	0	0	0	0	0	0	0	0	0	0	0	0	0
ID_270	0.000265755	7.3619e-05	0.000225007	4.30004e-05	0.000423544	5.85146e-05	0	0	0	0	0	0	1.56937e-05	2.21942e-05	0	0	2.00248e-05	2.83194e-05	4.9783e-05	3.82463e-05	1.47304e-05	2.08319e-05	1.72989e-05	2.44644e-05	1.19065e-05	1.68383e-05	1.35446e-05	1.9155e-05	5.49473e-05	1.69459e-05	1.15845e-05	1.6383e-05	3.48311e-05	2.80633e-05	3.7291e-05	7.02436e-06	0	0	1.19043e-05	1.68353e-05	0	0	0	0	0	0	0	0	0
ID_271	0.000396495	0.000156177	0.000441988	0.000123114	0.000383083	0.000127719	0	0	0	0	0	0	1.24443e-05	1.75989e-05	0	0	9.71534e-06	1.37396e-05	0	0	1.47304e-05	2.08319e-05	0	0	0	0	2.62464e-05	1.85877e-05	2.62819e-05	3.71682e-05	2.16338e-05	3.05948e-05	0	0	0	0	0	0	0	0	0	0	0	0	0	0	0	0	0
ID_272	0.00231585	0.000490946	0.00199846	0.000744242	0.00209359	0.000274656	0.000270903	0.000122169	8.61846e-05	0.000121883	0.000124017	3.27509e-05	0.000183019	5.20749e-05	0.000115638	8.15954e-05	0.000254438	2.64206e-05	0.000231786	5.09205e-05	0.000196301	0.000119676	0.000286801	0.000289806	0.000245411	3.27469e-06	0.000739739	0.000207378	0.00115961	0.000719271	0.000666067	0.00066255	0.000427927	0.00018361	0.000623242	0.000176358	0.000343656	6.86089e-05	0.000238969	9.65985e-05	0.000661638	0.000167926	0.000363605	0.000322975	2.07542e-05	2.93509e-05	7.48895e-05	0.00010591	7.12784e-05
ID_273	3.65508e-05	3.39562e-05	2.78823e-05	3.94316e-05	0.000126353	0.000133426	0.000109046	0.000113139	9.53072e-05	7.15423e-05	1.22617e-05	1.73406e-05	7.62182e-05	8.09626e-05	3.26797e-05	4.62161e-05	1.94307e-05	2.74791e-05	3.10286e-05	2.3359e-05	5.21331e-05	4.61518e-05	1.93304e-05	2.73373e-05	6.7464e-05	2.51241e-05	0.000151852	7.53122e-05	1.38169e-05	1.95401e-05	0.000179187	6.35643e-05	0.000158373	5.22873e-05	3.20763e-05	2.5761e-05	0.000128034	8.63295e-05	0.000151564	0.000121779	0.000203889	0.000164605	0.000274904	7.56121e-05	0.000196981	0.00023592	0.000313845	0.00016803	0.000116126
ID_274	0.000368643	0.000117879	0.000503677	0.000315079	0.000425347	0.000100801	2.82271e-05	3.99191e-05	0.000100383	7.27912e-05	0.00011039	9.01476e-05	1.24443e-05	1.75989e-05	3.49e-05	2.6867e-05	0.000130944	4.06527e-05	3.75735e-05	5.3137e-05	1.47304e-05	2.08319e-05	5.39283e-05	4.24709e-05	3.50779e-05	2.83828e-05	0.000116607	6.12108e-05	2.76339e-05	3.90802e-05	0.000143666	0.000108689	0.000104964	7.51406e-05	9.50671e-05	5.0841e-05	2.25177e-05	1.69637e-05	2.38087e-05	3.36705e-05	5.86942e-05	5.61565e-05	3.64232e-05	3.57278e-05	7.68138e-05	0.000108631	0	0	3.56392e-05
ID_275	0.000100368	0.000105043	0	0	4.54411e-05	6.42634e-05	0.000441535	0.000252338	0.000783304	0.000195515	6.40617e-05	6.6309e-05	0.000395728	0.000275163	7.20204e-05	5.15754e-05	0.000189236	5.81073e-05	0.000448921	2.41197e-05	0.000890748	0.000217099	0.000706733	0.000439761	0.000521924	0.000117778	2.62464e-05	1.85877e-05	0.000167225	8.42535e-06	0.000270497	0.000155024	0.000124012	6.45932e-05	2.15641e-05	1.52624e-05	9.12671e-05	2.25985e-05	4.76173e-05	6.73411e-05	0.000142322	7.85979e-05	0.000158389	1.64757e-05	0.000247944	1.38614e-05	9.78169e-05	1.54708e-05	8.39802e-05
ID_276	0	0	1.80307e-05	2.54992e-05	0	0	4.8949e-05	3.58119e-05	0.000225099	0.00014571	4.90701e-05	6.93956e-05	0.000127742	9.92498e-05	0.000113373	0.000109514	6.00745e-05	8.49582e-05	1.54981e-05	2.19176e-05	0.00022416	6.96525e-05	1.72989e-05	2.44644e-05	7.50839e-05	2.42369e-05	9.82778e-05	5.82054e-05	8.15496e-05	6.77158e-05	0.000130284	9.2743e-05	0.000122131	5.98314e-05	5.7776e-05	5.20414e-05	6.69584e-05	2.85534e-05	7.89198e-05	2.53589e-05	0.000144121	0.000106297	2.83206e-05	4.00514e-05	4.40567e-05	6.23056e-05	0	0	1.27018e-05
ID_277	0.000212569	9.53365e-05	0.000190465	4.27957e-05	0.000133146	4.40122e-05	0.000192513	0.000113461	0.000153793	7.70754e-05	0.000126758	7.5195e-05	0.000202408	4.38693e-05	4.80136e-05	3.43836e-05	5.88862e-05	4.76027e-05	2.44837e-05	3.46252e-05	7.5254e-05	2.80786e-05	5.59597e-05	4.74367e-05	4.39718e-05	4.01962e-05	6.66423e-05	4.9534e-05	4.00988e-05	3.22028e-05	5.71309e-05	3.3288e-05	0.000170714	0.000194862	5.93946e-05	2.90457e-05	1.18569e-05	1.67682e-05	0	0	7.99355e-05	2.81129e-05	8.41039e-05	6.09855e-05	6.4811e-05	5.39884e-05	0	0	0.000116126
ID_278	8.70423e-05	6.35037e-05	0.000172434	5.91457e-05	0.000181357	0.000256477	6.9671e-05	5.1856e-05	2.87282e-05	4.06278e-05	5.18001e-05	7.32563e-05	8.54132e-05	4.18923e-05	2.17865e-05	3.08108e-05	0.000123494	6.44286e-05	6.85697e-05	4.91507e-05	0.000112657	7.96914e-05	5.48367e-05	4.25771e-05	3.2386e-05	4.58008e-05	3.24783e-05	2.45458e-05	9.53665e-05	8.54137e-05	2.02669e-05	1.47651e-05	7.29892e-05	2.40024e-05	3.7291e-05	7.02436e-06	0.000134512	2.3318e-05	0	0	1.49303e-05	2.11146e-05	0	0	7.68138e-05	0.000108631	0	0	0
ID_279	0.00018413	4.72972e-05	0.000477896	5.01426e-05	0.000608078	0.000267268	8.71095e-05	7.21364e-05	4.0729e-05	2.90147e-05	6.26968e-05	1.83985e-05	9.33573e-05	3.29276e-05	2.62271e-05	3.70907e-05	5.48926e-05	6.11138e-06	9.3021e-05	6.6217e-05	8.40929e-05	8.95144e-05	7.32587e-05	5.20402e-05	4.73051e-05	4.46378e-05	0	0	0	0	1.73647e-05	2.45574e-05	1.47807e-05	2.0903e-05	1.05123e-05	1.48666e-05	0	0	1.52144e-05	2.15165e-05	0	0	0	0	0	0	0	0	0
ID_280	0.000308484	0.000102886	0.000468045	0.000106417	0.000613497	0.000108114	0	0	0	0	1.22617e-05	1.73406e-05	0	0	0	0	0	0	0	0	0	0	0	0	1.19065e-05	1.68383e-05	0	0	0	0	0	0	0	0	0	0	0	0	0	0	0	0	0	0	0	0	0	0	0
ID_281	0.000348727	0.000110153	0.000344869	0.000118291	0.000329464	0.000106015	0	0	0	0	1.22617e-05	1.73406e-05	0	0	1.31136e-05	1.85454e-05	1.94307e-05	2.74791e-05	0	0	0	0	0	0	1.19065e-05	1.68383e-05	0	0	0	0	0	0	0	0	1.5727e-05	2.22413e-05	0	0	0	0	0	0	0	0	0	0	0	0	0
ID_282	5.51194e-05	3.89819e-05	2.6363e-05	3.72829e-05	0	0	4.14439e-05	5.86105e-05	6.25326e-05	5.35626e-05	7.357e-05	0.000104044	5.62759e-05	4.05813e-05	0.000155023	6.12963e-05	1.54371e-05	2.18314e-05	2.774e-05	2.00164e-05	6.73119e-05	5.41422e-05	0	0	2.34922e-05	1.66161e-05	3.33212e-05	2.4767e-05	0	0	1.73647e-05	2.45574e-05	2.33775e-05	1.65404e-05	2.15641e-05	1.52624e-05	2.37138e-05	3.35364e-05	0	0	0	0	0	0	0	0	0	0	0
ID_283	2.78528e-05	3.93898e-05	2.78823e-05	3.94316e-05	0	0	0.000155566	7.11687e-05	0.000201447	4.25732e-05	0.000148575	0.000158384	0.000175773	0.000105837	0.000288259	9.77371e-05	0.000120635	5.11809e-05	0.000148533	2.99292e-05	6.09721e-05	5.7864e-05	0.000210174	3.87816e-05	0.000118735	3.35554e-05	4.06339e-05	5.7465e-05	5.73308e-05	4.06177e-05	1.94993e-05	1.40337e-05	0	0	5.47195e-05	5.65697e-05	3.13877e-05	2.27533e-05	1.39962e-05	1.97936e-05	5.58211e-05	2.39791e-05	8.72587e-05	6.10599e-05	0	0	0	0	0
ID_284	0.000545422	0.000108048	0.000599277	0.000167796	0.000618487	0.000155003	8.58953e-05	6.91632e-05	2.18036e-05	3.08349e-05	1.22617e-05	1.73406e-05	0	0	4.8058e-05	3.44233e-05	2.97402e-05	2.45289e-05	1.87868e-05	2.65685e-05	0	0	0.000116676	5.31776e-05	2.34922e-05	1.66161e-05	0	0	0	0	1.08169e-05	1.52974e-05	2.38479e-05	3.3726e-05	0	0	0	0	0	0	0	0	0	0	0	0	0	0	0
ID_285	0.000250467	4.37318e-05	0.000241672	0.000108753	0.000834467	0.000839423	0	0	4.36072e-05	6.16699e-05	0	0	1.56937e-05	2.21942e-05	2.62715e-05	3.71536e-05	0	0	0	0	0	0	0	0	0	0	0	0	0	0	0	0	1.14536e-05	1.61978e-05	0	0	0	0	0	0	0	0	0	0	0	0	0	0	0
ID_286	0	0	0	0	0	0	0	0	0	0	0	0	1.34436e-05	1.90121e-05	0	0	0	0	0	0	0	0	0	0	0	0	0	0	0	0	0	0	0	0	0	0	3.91525e-05	3.35259e-05	1.52144e-05	2.15165e-05	1.20572e-05	1.70515e-05	5.57833e-05	2.15038e-05	3.84069e-05	5.43155e-05	8.5833e-05	6.37821e-05	0.000155259
ID_287	0	0	0	0	0	0	2.0722e-05	2.93053e-05	0	0	0	0	0	0	0	0	0	0	0	0	0	0	0	0	0	0	0	0	0	0	0	0	0	0	0	0	8.58945e-05	7.2735e-05	4.19886e-05	5.93808e-05	0.00014966	2.23375e-05	0.000112071	6.57348e-05	6.22626e-05	8.80526e-05	6.29056e-05	4.68399e-05	0.000162001
ID_288	0	0	4.5913e-05	3.4635e-05	0	0	0.000112329	0.000102926	0	0	2.59e-05	3.66282e-05	4.97772e-05	7.03957e-05	1.31136e-05	1.85454e-05	2.97402e-05	2.45289e-05	4.98154e-05	4.69396e-05	0.000112657	7.96914e-05	1.93304e-05	2.73373e-05	2.34922e-05	1.66161e-05	0	0	2.86654e-05	2.03088e-05	1.15845e-05	1.6383e-05	1.19239e-05	1.6863e-05	7.45821e-05	1.40487e-05	8.86997e-06	1.2544e-05	0	0	1.20572e-05	1.70515e-05	2.43078e-05	3.43765e-05	0	0	0	0	0
ID_289	0.000158797	5.44783e-05	0.000246076	0.000118149	0.000337642	7.54979e-05	2.0722e-05	2.93053e-05	6.6579e-05	4.83861e-05	3.67967e-05	3.00492e-05	1.24443e-05	1.75989e-05	1.08932e-05	1.54054e-05	1.54371e-05	2.18314e-05	1.87868e-05	2.65685e-05	3.74028e-05	5.28955e-05	0	0	1.19065e-05	1.68383e-05	1.97765e-05	2.79682e-05	1.48485e-05	2.09989e-05	8.68236e-06	1.22787e-05	0	0	1.05123e-05	1.48666e-05	0	0	0	0	0	0	0	0	0	0	0	0	0
ID_290	0.000510189	0.000302036	0.00024471	7.05427e-05	0.0001754	0.000139314	0	0	2.18036e-05	3.08349e-05	0	0	1.34436e-05	1.90121e-05	5.25431e-05	7.43071e-05	3.08742e-05	4.36627e-05	0	0	2.94607e-05	4.16638e-05	0	0	1.15857e-05	1.63847e-05	0	0	0	0	8.68236e-06	1.22787e-05	0	0	0	0	0	0	0	0	0	0	0	0	0	0	0	0	0
ID_291	0	0	0	0	0	0	2.94412e-05	4.16362e-05	3.78508e-05	5.35292e-05	0	0	5.50251e-05	1.85593e-05	1.31136e-05	1.85454e-05	2.51524e-05	1.91162e-05	5.55123e-05	4.49834e-05	0.000127387	6.90481e-05	0	0	3.96852e-05	6.30115e-06	3.24783e-05	2.45458e-05	0	0	1.94993e-05	1.40337e-05	0	0	2.15641e-05	1.52624e-05	0	0	1.19043e-05	1.68353e-05	2.78067e-05	3.93247e-05	0	0	0	0	0	0	4.23819e-05
ID_292	0.000383344	6.43858e-05	0.000361073	0.000165514	0.000439889	9.71348e-05	5.01632e-05	3.70433e-05	4.0729e-05	2.90147e-05	7.63351e-05	6.34712e-05	1.34436e-05	1.90121e-05	2.62715e-05	3.71536e-05	9.71534e-06	1.37396e-05	1.22418e-05	1.73126e-05	8.95359e-05	9.70663e-05	0	0	1.6193e-05	2.29004e-05	0	0	2.62819e-05	3.71682e-05	0	0	1.19239e-05	1.6863e-05	3.20763e-05	2.5761e-05	1.18569e-05	1.67682e-05	0	0	0	0	0	0	0	0	0	0	0
ID_293	7.17544e-05	1.54664e-05	3.60614e-05	5.09985e-05	0.00020089	0.000195782	7.96044e-05	7.31625e-05	0	0	0	0	0	0	0	0	1.54371e-05	2.18314e-05	1.54981e-05	2.19176e-05	8.15938e-05	5.82915e-05	3.45979e-05	4.89288e-05	5.1271e-05	1.39275e-05	0	0	0	0	2.24014e-05	1.58681e-05	0	0	5.31009e-05	5.33956e-05	0	0	1.19043e-05	1.68353e-05	2.88336e-05	2.04272e-05	2.74627e-05	2.03426e-05	3.84069e-05	5.43155e-05	0.000111294	9.3664e-05	4.23819e-05
ID_294	0.000438841	0.000172713	0.000341677	6.45253e-05	0.000326276	0.00016276	0	0	0	0	2.59e-05	3.66282e-05	0	0	0	0	0	0	0	0	0	0	1.72989e-05	2.44644e-05	0	0	0	0	0	0	0	0	2.29071e-05	3.23956e-05	1.05123e-05	1.48666e-05	0	0	0	0	0	0	0	0	0	0	0	0	0
ID_295	0.000159558	6.64365e-05	8.87873e-05	6.60163e-05	0.000207683	1.96374e-05	0.000227666	4.17607e-05	7.63818e-05	7.1722e-05	0.000186714	2.67784e-05	0.000184018	7.73705e-05	0.000148526	6.54119e-05	0.000206996	8.68389e-05	0.000273463	0.000101165	0.000239595	0.000227429	0.000131944	5.33963e-05	0.000125713	5.95033e-05	9.28887e-05	3.87603e-05	9.94927e-05	5.76978e-05	7.00823e-05	2.61833e-05	2.33775e-05	1.65404e-05	7.97968e-05	4.5911e-05	3.25838e-05	2.9349e-05	3.5713e-05	5.05058e-05	0.000138168	0.000118495	7.51433e-05	7.28166e-06	0.000103218	2.97749e-05	6.98227e-05	9.87441e-05	0.000128828
ID_296	4.99052e-05	7.05766e-05	0	0	6.17971e-05	8.73942e-05	2.82271e-05	3.99191e-05	2.18036e-05	3.08349e-05	0	0	5.72752e-05	2.61116e-05	1.31136e-05	1.85454e-05	2.97402e-05	2.45289e-05	0	0	0	0	3.95692e-05	2.80018e-05	0	0	0	0	0	0	8.68236e-06	1.22787e-05	1.19239e-05	1.6863e-05	3.26159e-05	2.7082e-05	1.18569e-05	1.67682e-05	2.38087e-05	3.36705e-05	4.2737e-05	3.40871e-05	0	0	0	0	6.03722e-05	4.42308e-05	3.56392e-05
ID_297	0.000409264	7.14498e-05	0.000289104	5.19677e-05	0.000361736	0.000243099	0	0	0	0	0	0	0	0	0	0	0	0	1.22418e-05	1.73126e-05	0	0	0	0	0	0	0	0	0	0	0	0	0	0	0	0	0	0	0	0	0	0	0	0	0	0	0	0	0
ID_298	0	0	0	0	2.59081e-05	3.66396e-05	0	0	0	0	0	0	0	0	0	0	0	0	0	0	0	0	0	0	0	0	0	0	0	0	0	0	0	0	0	0	0	0	0	0	0	0	5.66412e-05	8.01027e-05	0	0	0	0	2.54036e-05
ID_299	0.000608653	0.000119347	0.000415625	0.000103253	0.000494893	3.5217e-05	0	0	2.87282e-05	4.06278e-05	1.22617e-05	1.73406e-05	4.25808e-05	3.30833e-05	7.65054e-05	3.48791e-05	0	0	2.774e-05	2.00164e-05	0	0	0	0	0	0	1.97765e-05	2.79682e-05	1.38169e-05	1.95401e-05	1.73647e-05	2.45574e-05	1.19239e-05	1.6863e-05	1.10518e-05	1.56296e-05	0	0	0	0	0	0	0	0	0	0	0	0	0
ID_300	7.11681e-05	6.84605e-05	0.000108491	7.68047e-05	5.18162e-05	7.32791e-05	0	0	4.76536e-05	3.57712e-05	3.81617e-05	3.17359e-05	0	0	2.40068e-05	1.71918e-05	1.94307e-05	2.74791e-05	0	0	0	0	2.02388e-05	2.8622e-05	0	0	0	0	1.48485e-05	2.09989e-05	8.68236e-06	1.22787e-05	2.38479e-05	3.3726e-05	0	0	8.86997e-06	1.2544e-05	1.52144e-05	2.15165e-05	0	0	7.33504e-05	5.57579e-05	0.000103218	2.97749e-05	3.49113e-05	4.93721e-05	2.54036e-05
ID_301	0.000379477	5.12814e-05	0.000343043	0.000140032	0.000178587	7.97221e-05	0	0	0	0	2.45233e-05	3.46812e-05	2.48886e-05	3.51978e-05	3.71648e-05	3.23319e-05	7.43233e-05	3.04065e-05	1.54981e-05	2.19176e-05	6.93626e-05	9.80935e-05	2.02388e-05	2.8622e-05	0	0	0	0	0	0	0	0	0	0	0	0	0	0	0	0	0	0	0	0	0	0	0	0	0
ID_302	0.000502867	0.000130564	0.000292296	0.00022042	0.000311734	0.000111605	2.94412e-05	4.16362e-05	1.89254e-05	2.67646e-05	0.00013902	6.81955e-05	5.17758e-05	3.66927e-05	2.17865e-05	3.08108e-05	3.94555e-05	2.79087e-05	8.32523e-05	4.51872e-05	7.57024e-05	5.73396e-05	0	0	4.42925e-05	4.01252e-05	3.33212e-05	2.4767e-05	4.24823e-05	3.38758e-05	2.81816e-05	2.14805e-05	0	0	2.67788e-05	1.97823e-05	0	0	0	0	2.78067e-05	3.93247e-05	2.43078e-05	3.43765e-05	2.07542e-05	2.93509e-05	0	0	4.23819e-05
ID_303	0	0	3.60614e-05	5.09985e-05	4.86286e-05	3.46065e-05	0	0	1.89254e-05	2.67646e-05	0	0	0	0	0	0	0	0	0	0	0	0	2.02388e-05	2.8622e-05	0	0	0	0	1.48485e-05	2.09989e-05	0	0	0	0	0	0	0	0	2.79924e-05	3.95872e-05	5.2948e-05	1.3772e-05	2.25149e-05	3.18409e-05	0	0	0	0	0
ID_304	0.000185302	0.000133069	0.000190465	4.27957e-05	0.000249518	0.000224386	7.08851e-05	5.22345e-05	0	0	2.59e-05	3.66282e-05	1.24443e-05	1.75989e-05	5.25431e-05	7.43071e-05	2.51524e-05	1.91162e-05	7.75553e-05	2.7192e-05	5.25816e-05	3.79829e-05	1.93304e-05	2.73373e-05	0	0	1.27018e-05	1.79631e-05	1.48485e-05	2.09989e-05	6.65809e-05	5.32087e-05	5.29388e-05	2.52822e-05	3.1454e-05	4.44826e-05	8.86997e-06	1.2544e-05	1.52144e-05	2.15165e-05	0	0	4.76807e-05	2.66434e-05	0	0	2.54608e-05	3.60071e-05	4.23819e-05
ID_305	0.000370954	0.000111214	0.000290623	9.06376e-05	0.000256312	5.25233e-05	0	0	2.87282e-05	4.06278e-05	0	0	2.8138e-05	2.02906e-05	0	0	0	0	1.87868e-05	2.65685e-05	0	0	1.93304e-05	2.73373e-05	0	0	1.97765e-05	2.79682e-05	0	0	0	0	1.19239e-05	1.6863e-05	0	0	0	0	0	0	0	0	0	0	0	0	0	0	0
ID_306	0.000378891	7.28353e-05	0.000197125	8.13771e-05	0.000313118	5.34348e-05	2.94412e-05	4.16362e-05	0	0	0	0	1.56937e-05	2.21942e-05	0	0	0	0	0	0	0	0	1.72989e-05	2.44644e-05	1.6193e-05	2.29004e-05	1.27018e-05	1.79631e-05	0	0	2.24014e-05	1.58681e-05	0	0	1.10518e-05	1.56296e-05	0	0	0	0	0	0	0	0	0	0	0	0	0
ID_307	0.000168081	6.17411e-05	0.000152884	7.54717e-05	7.95272e-05	1.00967e-05	7.96044e-05	7.31625e-05	7.63818e-05	7.1722e-05	6.2685e-05	4.62864e-05	2.91372e-05	2.07866e-05	5.44662e-05	7.70269e-05	7.8911e-05	5.58175e-05	4.65267e-05	8.01587e-06	7.48055e-05	0.000105791	9.23745e-05	6.67991e-05	4.66637e-05	4.32664e-05	0	0	1.38169e-05	1.95401e-05	5.78985e-05	4.33196e-05	4.62846e-05	4.27346e-05	7.98796e-05	3.36353e-05	5.39055e-05	3.81262e-05	1.19043e-05	1.68353e-05	5.39749e-05	3.88095e-05	0.000105761	2.13348e-05	3.84069e-05	5.43155e-05	3.49113e-05	4.93721e-05	0.000148273
ID_308	1.85686e-05	2.62599e-05	1.80307e-05	2.54992e-05	5.36191e-05	3.92151e-05	2.0722e-05	2.93053e-05	4.36072e-05	6.16699e-05	0.000291702	0.000207038	5.50251e-05	1.85593e-05	3.93407e-05	5.56361e-05	2.00248e-05	2.83194e-05	1.22418e-05	1.73126e-05	0.000135329	0.000145127	7.73216e-05	0.000109349	0	0	0	0	0	0	2.81816e-05	2.14805e-05	1.47807e-05	2.0903e-05	0	0	1.77399e-05	2.50881e-05	0	0	0	0	5.62873e-05	7.96022e-05	0	0	0.000101843	0.000144028	5.50837e-05
ID_309	5.31859e-05	2.21455e-05	0	0	3.08985e-05	4.36971e-05	0	0	0	0	2.59e-05	3.66282e-05	4.05823e-05	3.08266e-05	1.08932e-05	1.54054e-05	3.88614e-05	5.49583e-05	2.44837e-05	3.46252e-05	0	0	7.41671e-05	2.09787e-05	7.2392e-05	5.95008e-05	4.6023e-05	9.46566e-06	0	0	7.37521e-05	2.21975e-05	4.62846e-05	4.27346e-05	1.10518e-05	1.56296e-05	0	0	0	0	1.39034e-05	1.96623e-05	3.64232e-05	3.57278e-05	0	0	0	0	0
ID_310	1.85686e-05	2.62599e-05	0	0	2.59081e-05	3.66396e-05	2.0722e-05	2.93053e-05	0	0	2.59e-05	3.66282e-05	5.72752e-05	2.61116e-05	0	0	0	0	0	0	3.74028e-05	5.28955e-05	0	0	0	0	5.165e-05	4.7315e-05	0	0	0.000120042	0.000100058	0	0	0	0	0.000165214	7.16395e-05	5.84213e-05	4.14177e-05	5.47942e-05	2.05452e-05	9.71542e-05	7.14818e-05	8.24636e-05	5.87197e-05	0.00108648	0.000426294	0.000247421
ID_311	0.000285845	0.00014553	0.000228199	0.000135917	0.000236779	0.000109222	2.0722e-05	2.93053e-05	0	0	2.45351e-05	3.46978e-05	0	0	0	0	1.94307e-05	2.74791e-05	0	0	0	0	0	0	1.19065e-05	1.68383e-05	1.97765e-05	2.79682e-05	1.48485e-05	2.09989e-05	0	0	1.19239e-05	1.6863e-05	1.5727e-05	2.22413e-05	2.07269e-05	1.51058e-05	0	0	1.49303e-05	2.11146e-05	0	0	3.84069e-05	5.43155e-05	2.54608e-05	3.60071e-05	0
ID_312	0.000301719	1.99353e-05	0.000316833	5.90669e-05	0.000241759	0.000168394	0	0	2.87282e-05	4.06278e-05	0	0	0	0	2.62715e-05	3.71536e-05	0	0	0	0	0	0	0	0	0	0	1.97765e-05	2.79682e-05	0	0	3.32183e-05	2.65181e-05	1.19239e-05	1.6863e-05	3.15368e-05	4.45998e-05	1.18569e-05	1.67682e-05	1.39962e-05	1.97936e-05	0	0	0	0	0	0	0	0	1.27018e-05
ID_313	0.00013153	9.30253e-05	0.00011667	3.1013e-05	0.000176784	6.06022e-05	2.0722e-05	2.93053e-05	2.18036e-05	3.08349e-05	2.45351e-05	3.46978e-05	1.56937e-05	2.21942e-05	0	0	2.97402e-05	2.45289e-05	8.40678e-05	6.04406e-05	1.47304e-05	2.08319e-05	3.86608e-05	5.46746e-05	2.31715e-05	3.27694e-05	0	0	0	0	2.24014e-05	1.58681e-05	1.19239e-05	1.6863e-05	0	0	1.18569e-05	1.67682e-05	0	0	0	0	0	0	2.07542e-05	2.93509e-05	2.54608e-05	3.60071e-05	3.56392e-05
ID_314	0	0	0	0	0	0	0	0	0	0	0	0	0	0	0	0	0	0	0	0	0	0	0	0	0	0	0	0	0	0	0	0	0	0	0	0	6.39715e-05	1.66652e-05	0	0	0	0	5.80802e-05	4.26734e-05	3.84069e-05	5.43155e-05	0	0	0
ID_315	0.000379477	5.12814e-05	0.000193504	0.000172166	0.000350392	0.000167085	0	0	2.18036e-05	3.08349e-05	0	0	0	0	0	0	0	0	0	0	0	0	0	0	0	0	0	0	0	0	0	0	0	0	0	0	0	0	0	0	0	0	0	0	0	0	0	0	0
ID_316	3.71371e-05	5.25198e-05	0.000137892	0.000142783	0.000144512	0.000113792	0	0	0	0	2.45351e-05	3.46978e-05	3.73329e-05	5.27967e-05	2.62715e-05	3.71536e-05	0	0	1.22418e-05	1.73126e-05	1.47304e-05	2.08319e-05	0	0	1.19065e-05	1.68383e-05	3.33212e-05	2.4767e-05	1.48485e-05	2.09989e-05	8.61043e-05	6.25042e-05	2.62342e-05	1.89927e-05	2.15641e-05	1.52624e-05	0	0	1.39962e-05	1.97936e-05	2.98606e-05	4.22292e-05	1.93601e-05	1.42245e-05	0	0	0	0	0
ID_317	2.72665e-05	3.85607e-05	2.78823e-05	3.94316e-05	4.86286e-05	3.46065e-05	0	0	0	0	0	0	0	0	0	0	0	0	0	0	0	0	0	0	0	0	0	0	0	0	1.08169e-05	1.52974e-05	0	0	3.7291e-05	7.02436e-06	1.77399e-05	2.50881e-05	0	0	1.20572e-05	1.70515e-05	1.12575e-05	1.59204e-05	0	0	3.74448e-05	5.29549e-05	0
ID_318	0.000211983	3.59071e-05	0.000308654	7.86615e-05	0.000308128	0.000117411	0	0	2.18036e-05	3.08349e-05	0	0	0	0	0	0	0	0	3.10286e-05	2.3359e-05	0	0	2.02388e-05	2.8622e-05	0	0	0	0	0	0	0	0	0	0	0	0	0	0	0	0	0	0	0	0	0	0	0	0	0
ID_319	0.000307108	0.000247103	0.000210015	0.000104404	0.000249937	0.000113116	0	0	0	0	3.81617e-05	3.17359e-05	0	0	0	0	2.51524e-05	1.91162e-05	0	0	2.31209e-05	3.26978e-05	0	0	3.2386e-05	4.58008e-05	0	0	0	0	1.08169e-05	1.52974e-05	2.29071e-05	3.23956e-05	0	0	0	0	0	0	0	0	0	0	0	0	0	0	0
ID_320	0.000237902	5.61839e-05	0.000247596	0.000179205	0.000256301	0.000260397	0	0	2.87282e-05	4.06278e-05	0	0	0	0	0	0	0	0	1.87868e-05	2.65685e-05	1.47304e-05	2.08319e-05	0	0	0	0	1.35446e-05	1.9155e-05	0	0	0	0	0	0	0	0	0	0	0	0	0	0	0	0	0	0	0	0	0
ID_321	0.000169428	1.89292e-05	0.00027092	3.83325e-05	0.000268095	0.000196075	2.94412e-05	4.16362e-05	0	0	2.45351e-05	3.46978e-05	1.34436e-05	1.90121e-05	3.71648e-05	3.23319e-05	0	0	0	0	0	0	0	0	0	0	0	0	0	0	1.15845e-05	1.6383e-05	1.19239e-05	1.6863e-05	2.62392e-05	1.96224e-05	0	0	0	0	0	0	0	0	0	0	0	0	0
ID_322	0.000222614	1.86894e-05	0.000262741	5.15149e-05	0.000285826	0.000147973	0	0	0	0	1.22617e-05	1.73406e-05	0	0	1.08932e-05	1.54054e-05	0	0	3.09962e-05	4.38353e-05	0	0	1.93304e-05	2.73373e-05	1.19065e-05	1.68383e-05	0	0	0	0	1.08169e-05	1.52974e-05	0	0	0	0	0	0	0	0	0	0	0	0	0	0	0	0	0
ID_323	0.000200562	0.000109401	5.57647e-05	7.88632e-05	0.000165419	0.000139313	0	0	2.87282e-05	4.06278e-05	2.45351e-05	3.46978e-05	1.24443e-05	1.75989e-05	0	0	9.71534e-06	1.37396e-05	0	0	0	0	0	0	0	0	1.35446e-05	1.9155e-05	0	0	0	0	0	0	1.05123e-05	1.48666e-05	0	0	0	0	0	0	8.10261e-06	1.14588e-05	0	0	0	0	0
ID_324	0.000322221	5.74316e-05	0.000233186	0.000120467	0.000196317	0.000105333	0	0	0	0	0	0	0	0	0	0	1.94307e-05	2.74791e-05	0	0	0	0	0	0	0	0	0	0	0	0	0	0	0	0	0	0	0	0	0	0	0	0	0	0	0	0	0	0	0
ID_325	0.000430526	9.27985e-05	0.000144399	8.91584e-05	0.000202693	8.90893e-05	2.0722e-05	2.93053e-05	0	0	0	0	0	0	0	0	0	0	0	0	0	0	0	0	0	0	0	0	0	0	0	0	0	0	0	0	0	0	0	0	0	0	0	0	0	0	0	0	0
ID_326	0.000177365	7.07165e-05	0.000106971	9.82578e-05	0.00028721	1.68957e-05	2.82271e-05	3.99191e-05	0	0	0	0	1.56937e-05	2.21942e-05	1.31136e-05	1.85454e-05	1.54371e-05	2.18314e-05	4.65267e-05	8.01587e-06	3.78512e-05	2.86698e-05	0	0	1.15857e-05	1.63847e-05	1.35446e-05	1.9155e-05	0	0	1.15845e-05	1.6383e-05	1.14536e-05	1.61978e-05	2.67788e-05	1.97823e-05	0	0	0	0	0	0	0	0	0	0	0	0	0
ID_327	0.000295716	8.63376e-05	0.000152731	5.43199e-05	0.000459433	0.000135366	0	0	0	0	0	0	0	0	0	0	0	0	0	0	0	0	0	0	0	0	0	0	0	0	0	0	0	0	0	0	0	0	0	0	0	0	0	0	0	0	0	0	0
ID_328	1.66351e-05	2.35255e-05	4.43937e-05	3.30082e-05	5.36191e-05	3.92151e-05	4.8949e-05	3.58119e-05	0	0	8.8585e-05	6.52827e-05	9.13588e-05	6.74478e-05	3.71648e-05	3.23319e-05	0	0	2.774e-05	2.00164e-05	9.24834e-05	0.000130791	9.84688e-05	7.2857e-05	0	0	0	0	0	0	0	0	1.19239e-05	1.6863e-05	0	0	0	0	0	0	0	0	0	0	0	0	0	0	0
ID_329	0.000138881	0.000103807	0.000326685	7.38954e-05	0.000228601	0.000122009	0	0	0	0	0	0	1.56937e-05	2.21942e-05	2.62715e-05	3.71536e-05	0	0	0	0	0	0	0	0	0	0	1.35446e-05	1.9155e-05	0	0	0	0	1.14536e-05	1.61978e-05	0	0	0	0	0	0	0	0	0	0	0	0	0	0	0
ID_330	0	0	0	0	0	0	2.0722e-05	2.93053e-05	3.78508e-05	5.35292e-05	3.81617e-05	3.17359e-05	7.89145e-05	4.98687e-05	6.11716e-05	1.6385e-05	0	0	0	0	0	0	0	0	7.90497e-05	3.07765e-05	2.54036e-05	3.59261e-05	0	0	2.02669e-05	1.47651e-05	1.14536e-05	1.61978e-05	1.5727e-05	2.22413e-05	0	0	0	0	0	0	0	0	0	0	0	0	0
ID_331	0.000240596	6.12663e-05	0.000212423	0.000243669	9.40698e-05	8.4277e-05	5.64541e-05	7.98382e-05	0	0	2.45233e-05	3.46812e-05	1.24443e-05	1.75989e-05	0	0	0	0	1.87868e-05	2.65685e-05	0	0	0	0	2.31715e-05	3.27694e-05	1.97765e-05	2.79682e-05	0	0	3.18514e-05	2.86715e-05	0	0	0	0	0	0	0	0	0	0	0	0	0	0	0	0	0
ID_332	0.000260512	0.000109155	8.19744e-05	6.62595e-05	0.000235394	5.65736e-05	2.94412e-05	4.16362e-05	1.89254e-05	2.67646e-05	0	0	1.24443e-05	1.75989e-05	0	0	0	0	3.99818e-05	3.03378e-05	1.47304e-05	2.08319e-05	0	0	0	0	1.35446e-05	1.9155e-05	0	0	8.68236e-06	1.22787e-05	0	0	0	0	0	0	0	0	0	0	0	0	0	0	0	0	0
ID_333	0.00018006	6.03641e-05	0.000307135	2.69797e-05	0.000186765	8.27517e-05	2.94412e-05	4.16362e-05	0	0	0	0	0	0	1.08932e-05	1.54054e-05	0	0	1.22418e-05	1.73126e-05	0	0	0	0	0	0	0	0	0	0	2.02669e-05	1.47651e-05	0	0	1.5727e-05	2.22413e-05	0	0	0	0	0	0	0	0	0	0	0	0	0
ID_334	4.58351e-05	3.41161e-05	2.78823e-05	3.94316e-05	0	0	0	0	0	0	0	0	1.34436e-05	1.90121e-05	0	0	0	0	0	0	0	0	0	0	0	0	1.27018e-05	1.79631e-05	2.76339e-05	3.90802e-05	3.32183e-05	2.65181e-05	2.33775e-05	1.65404e-05	0	0	1.18569e-05	1.67682e-05	0	0	0	0	0	0	0	0	0	0	7.37446e-05
ID_335	0.000252603	0.000104477	0.000247749	0.00018288	0.000142698	0.000111672	0	0	2.18036e-05	3.08349e-05	0	0	3.13873e-05	4.43884e-05	0	0	0	0	3.10286e-05	2.3359e-05	0	0	0	0	0	0	0	0	0	0	0	0	0	0	0	0	0	0	0	0	0	0	0	0	0	0	0	0	0
ID_336	0.0002466	4.26546e-05	0.00023182	0.000127759	0.000220851	0.000106304	0	0	0	0	0	0	0	0	0	0	1.54371e-05	2.18314e-05	0	0	0	0	0	0	0	0	1.35446e-05	1.9155e-05	1.38169e-05	1.95401e-05	0	0	0	0	0	0	0	0	0	0	0	0	0	0	0	0	0	0	0
ID_337	0.00016325	0.000165392	0.000180767	8.97462e-05	0.000124968	5.65581e-05	0	0	0	0	0	0	1.56937e-05	2.21942e-05	0	0	0	0	2.774e-05	2.00164e-05	0	0	0	0	0	0	1.97765e-05	2.79682e-05	0	0	1.08169e-05	1.52974e-05	3.81582e-05	4.4104e-06	1.05123e-05	1.48666e-05	0	0	0	0	0	0	0	0	0	0	0	0	0
ID_338	0.000288951	0.000101732	7.37954e-05	6.97041e-05	0.000162242	6.93257e-05	0	0	0	0	0	0	0	0	1.08932e-05	1.54054e-05	0	0	0	0	0	0	1.93304e-05	2.73373e-05	1.15857e-05	1.63847e-05	0	0	0	0	1.08169e-05	1.52974e-05	0	0	3.20763e-05	2.5761e-05	0	0	0	0	0	0	0	0	0	0	0	0	0
ID_339	0.00015821	3.62124e-05	0.00015425	5.67979e-05	0.00020089	0.000195782	0	0	2.18036e-05	3.08349e-05	2.59e-05	3.66282e-05	0	0	1.08932e-05	1.54054e-05	9.71534e-06	1.37396e-05	0	0	0	0	1.72989e-05	2.44644e-05	1.19065e-05	1.68383e-05	0	0	0	0	0	0	1.19239e-05	1.6863e-05	1.05123e-05	1.48666e-05	0	0	0	0	0	0	0	0	0	0	0	0	0
ID_340	8.89758e-05	6.8654e-05	8.21276e-05	6.83313e-05	7.45367e-05	6.36215e-05	2.94412e-05	4.16362e-05	1.89254e-05	2.67646e-05	0	0	0	0	3.93851e-05	3.2176e-05	4.9765e-05	5.11716e-05	0	0	0	0	0	0	1.19065e-05	1.68383e-05	1.27018e-05	1.79631e-05	0	0	2.16338e-05	3.05948e-05	1.19239e-05	1.6863e-05	2.10245e-05	2.97332e-05	0	0	0	0	0	0	0	0	0	0	0	0	0
ID_341	8.83895e-05	8.10765e-06	0.000170762	7.67835e-05	0.000237197	0.000168169	4.8949e-05	3.58119e-05	0	0	0	0	3.73329e-05	5.27967e-05	0	0	1.94307e-05	2.74791e-05	0	0	0	0	2.02388e-05	2.8622e-05	4.76259e-05	6.73531e-05	1.35446e-05	1.9155e-05	0	0	0	0	0.000115389	0.000138661	0	0	0	0	1.19043e-05	1.68353e-05	1.39034e-05	1.96623e-05	0	0	0	0	0	0	0
ID_342	5.91895e-05	6.50137e-05	1.80307e-05	2.54992e-05	5.18162e-05	7.32791e-05	0	0	0	0	0	0	0	0	0	0	0	0	1.22418e-05	1.73126e-05	0	0	0	0	2.77788e-05	2.0437e-05	0	0	1.38169e-05	1.95401e-05	0	0	0	0	0	0	8.86997e-06	1.2544e-05	1.39962e-05	1.97936e-05	3.98639e-05	3.41561e-05	0	0	0	0	2.54608e-05	3.60071e-05	0
ID_343	0.000132877	3.68095e-05	0.000152731	5.43199e-05	0.000168606	0.000120307	0	0	2.87282e-05	4.06278e-05	0	0	4.05823e-05	3.08266e-05	0	0	0	0	0	0	0	0	0	0	0	0	0	0	0	0	8.68236e-06	1.22787e-05	2.67046e-05	1.92044e-05	2.62392e-05	1.96224e-05	0	0	0	0	0	0	0	0	0	0	0	0	0
ID_344	0.00012746	8.8094e-05	4.5913e-05	3.4635e-05	0.000194943	0.000126618	0	0	5.05318e-05	3.67241e-05	2.45351e-05	3.46978e-05	1.24443e-05	1.75989e-05	0	0	1.54371e-05	2.18314e-05	1.87868e-05	2.65685e-05	1.47304e-05	2.08319e-05	1.72989e-05	2.44644e-05	0	0	2.62464e-05	1.85877e-05	0	0	0	0	1.47807e-05	2.0903e-05	0	0	0	0	0	0	0	0	0	0	0	0	0	0	0
ID_345	0.000268449	5.25687e-05	0.000165621	0.000136615	0.000154064	5.87055e-05	0	0	0	0	1.22617e-05	1.73406e-05	1.34436e-05	1.90121e-05	0	0	0	0	0	0	3.74028e-05	5.28955e-05	0	0	0	0	0	0	0	0	0	0	0	0	0	0	0	0	0	0	0	0	0	0	0	0	0	0	0
ID_346	7.23407e-05	7.00454e-05	0.000108337	3.81859e-05	0.0003763	0.000198231	0	0	0	0	1.22617e-05	1.73406e-05	1.34436e-05	1.90121e-05	2.40068e-05	1.71918e-05	1.54371e-05	2.18314e-05	1.54981e-05	2.19176e-05	0	0	0	0	0	0	0	0	2.62819e-05	3.71682e-05	0	0	1.47807e-05	2.0903e-05	0	0	0	0	0	0	0	0	0	0	0	0	0	0	0
ID_347	0	0	0	0	5.68066e-05	4.06307e-05	0	0	0	0	0	0	0	0	0	0	0	0	0	0	0	0	0	0	0	0	0	0	0	0	0	0	0	0	0	0	3.43747e-05	5.9124e-06	1.39962e-05	1.97936e-05	1.39034e-05	1.96623e-05	1.93601e-05	1.42245e-05	0	0	0	0	0
ID_348	0	0	0	0	0	0	2.94412e-05	4.16362e-05	0	0	0	0	1.34436e-05	1.90121e-05	0	0	2.97402e-05	2.45289e-05	0	0	0	0	0	0	2.77788e-05	2.0437e-05	9.26507e-05	0.000103632	1.48485e-05	2.09989e-05	1.08169e-05	1.52974e-05	2.33775e-05	1.65404e-05	3.1454e-05	4.44826e-05	0	0	2.59005e-05	1.84928e-05	1.49303e-05	2.11146e-05	0	0	2.07542e-05	2.93509e-05	0	0	0
ID_349	0.000160144	7.5125e-06	0.00011515	9.69889e-05	0.000147689	8.85697e-05	2.0722e-05	2.93053e-05	0	0	0	0	0	0	0	0	0	0	3.09962e-05	4.38353e-05	2.31209e-05	3.26978e-05	0	0	0	0	1.97765e-05	2.79682e-05	0	0	0	0	1.47807e-05	2.0903e-05	1.05123e-05	1.48666e-05	0	0	0	0	0	0	0	0	0	0	0	0	0
ID_350	0.00028567	5.40607e-05	0.000118189	3.66979e-05	0.000110426	5.31522e-05	0	0	0	0	0	0	0	0	0	0	9.71534e-06	1.37396e-05	0	0	0	0	0	0	0	0	0	0	0	0	0	0	0	0	0	0	0	0	0	0	0	0	0	0	0	0	0	0	0
ID_351	0.000232659	0.000124763	0.000223641	0.000123857	0.000178587	7.97221e-05	2.0722e-05	2.93053e-05	1.89254e-05	2.67646e-05	0	0	0	0	0	0	9.71534e-06	1.37396e-05	0	0	1.47304e-05	2.08319e-05	2.02388e-05	2.8622e-05	0	0	0	0	0	0	8.68236e-06	1.22787e-05	0	0	1.05123e-05	1.48666e-05	0	0	0	0	0	0	0	0	0	0	0	0	0
ID_352	9.28428e-06	1.31299e-05	0	0	0	0	0	0	0	0	3.81617e-05	3.17359e-05	7.39681e-05	5.78561e-05	3.49e-05	2.6867e-05	1.54371e-05	2.18314e-05	3.67255e-05	5.19378e-05	0	0	0	0	0	0	0	0	1.48485e-05	2.09989e-05	3.3986e-05	2.8397e-05	1.19239e-05	1.6863e-05	1.10518e-05	1.56296e-05	0	0	0	0	0	0	0	0	0	0	0	0	0
ID_353	0.000134225	2.62844e-05	0.000234705	0.000101848	0.000181775	2.01817e-05	0	0	0	0	0	0	1.56937e-05	2.21942e-05	3.93851e-05	3.2176e-05	0	0	0	0	0	0	0	0	0	0	0	0	0	0	0	0	0	0	0	0	0	0	0	0	0	0	0	0	0	0	0	0	0
ID_354	0.000300958	9.85319e-05	0.000233339	6.20261e-05	0.000388073	0.000167847	2.94412e-05	4.16362e-05	0	0	0	0	0	0	0	0	0	0	0	0	2.31209e-05	3.26978e-05	0	0	2.77788e-05	2.0437e-05	0	0	0	0	1.94993e-05	1.40337e-05	1.19239e-05	1.6863e-05	1.5727e-05	2.22413e-05	0	0	0	0	0	0	0	0	0	0	0	0	0
ID_355	0.000123593	2.98589e-05	0.000225007	4.30004e-05	0.000191327	0.000142246	0	0	0	0	1.22617e-05	1.73406e-05	1.56937e-05	2.21942e-05	1.08932e-05	1.54054e-05	0	0	0	0	0	0	0	0	0	0	0	0	0	0	0	0	0	0	0	0	0	0	0	0	0	0	0	0	0	0	0	0	0
ID_356	7.11681e-05	6.84605e-05	0	0	0	0	2.94412e-05	4.16362e-05	2.18036e-05	3.08349e-05	3.6785e-05	5.20218e-05	4.25808e-05	3.30833e-05	1.08932e-05	1.54054e-05	1.54371e-05	2.18314e-05	4.98154e-05	4.69396e-05	6.09721e-05	5.7864e-05	3.45979e-05	4.89288e-05	6.28567e-05	2.97517e-05	3.95531e-05	5.59365e-05	0	0	2.02669e-05	1.47651e-05	0	0	3.78306e-05	2.7867e-05	2.07269e-05	1.51058e-05	1.19043e-05	1.68353e-05	0	0	1.93601e-05	1.42245e-05	4.40567e-05	6.23056e-05	3.74448e-05	5.29549e-05	1.27018e-05
ID_357	0	0	2.6363e-05	3.72829e-05	0	0	0	0	4.36072e-05	6.16699e-05	1.22617e-05	1.73406e-05	1.24443e-05	1.75989e-05	1.31136e-05	1.85454e-05	0	0	0	0	3.74028e-05	5.28955e-05	1.72989e-05	2.44644e-05	3.53987e-05	2.91683e-05	1.97765e-05	2.79682e-05	4.35139e-05	3.64004e-05	3.03161e-05	2.66673e-05	3.53014e-05	2.92151e-05	1.10518e-05	1.56296e-05	3.13877e-05	2.27533e-05	0	0	0	0	0	0	0	0	0	0	0
ID_358	0.00015086	9.96763e-06	0.000100158	4.85566e-05	0.000107238	7.84302e-05	2.0722e-05	2.93053e-05	0	0	0	0	1.56937e-05	2.21942e-05	2.62715e-05	3.71536e-05	0	0	0	0	0	0	0	0	0	0	0	0	0	0	1.73647e-05	2.45574e-05	0	0	1.5727e-05	2.22413e-05	0	0	0	0	0	0	0	0	0	0	0	0	0
ID_359	0.000172912	9.97182e-05	2.6363e-05	3.72829e-05	0.000129959	9.22247e-05	0	0	0	0	3.67967e-05	3.00492e-05	0	0	0	0	0	0	0	0	0	0	2.02388e-05	2.8622e-05	0	0	0	0	0	0	0	0	0	0	0	0	2.07269e-05	1.51058e-05	0	0	0	0	8.10261e-06	1.14588e-05	0	0	0	0	0
ID_360	9.28428e-06	1.31299e-05	2.78823e-05	3.94316e-05	0	0	2.94412e-05	4.16362e-05	0	0	0	0	1.56937e-05	2.21942e-05	1.31136e-05	1.85454e-05	0	0	0	0	0	0	0	0	0	0	1.27018e-05	1.79631e-05	2.86654e-05	2.03088e-05	3.3986e-05	2.8397e-05	0	0	1.05123e-05	1.48666e-05	8.86997e-06	1.2544e-05	0	0	1.49303e-05	2.11146e-05	2.74627e-05	2.03426e-05	3.84069e-05	5.43155e-05	6.98227e-05	9.87441e-05	0
ID_361	0.000245253	7.74678e-05	9.8639e-05	4.37952e-05	0.000189953	6.28073e-05	0	0	0	0	0	0	0	0	0	0	0	0	0	0	0	0	0	0	1.6193e-05	2.29004e-05	0	0	0	0	0	0	0	0	0	0	0	0	0	0	0	0	0	0	0	0	0	0	0
ID_362	0.000171948	0.000114989	7.2276e-05	1.29919e-05	0.000181775	2.01817e-05	0	0	0	0	2.45351e-05	3.46978e-05	0	0	0	0	0	0	0	0	0	0	0	0	0	0	0	0	1.48485e-05	2.09989e-05	0	0	0	0	0	0	0	0	0	0	0	0	0	0	0	0	0	0	0
ID_363	9.28428e-06	1.31299e-05	0	0	0	0	2.82271e-05	3.99191e-05	0	0	2.45351e-05	3.46978e-05	0	0	0	0	0	0	3.10286e-05	2.3359e-05	0	0	0	0	0	0	0	0	0	0	0	0	0	0	0	0	8.86997e-06	1.2544e-05	0	0	1.20572e-05	1.70515e-05	8.10261e-06	1.14588e-05	3.84069e-05	5.43155e-05	0	0	0
ID_364	0.000143509	3.09328e-05	0.00011667	3.1013e-05	6.81617e-05	9.63952e-05	2.82271e-05	3.99191e-05	2.87282e-05	4.06278e-05	2.45351e-05	3.46978e-05	0	0	0	0	0	0	0	0	0	0	0	0	0	0	0	0	1.38169e-05	1.95401e-05	1.08169e-05	1.52974e-05	3.81582e-05	4.4104e-06	0	0	1.36478e-05	1.93009e-05	0	0	0	0	0	0	0	0	0	0	0
ID_365	5.31859e-05	2.21455e-05	0	0	0	0	2.94412e-05	4.16362e-05	1.89254e-05	2.67646e-05	0	0	1.24443e-05	1.75989e-05	1.08932e-05	1.54054e-05	0	0	1.54981e-05	2.19176e-05	0	0	0	0	5.1271e-05	1.39275e-05	1.27018e-05	1.79631e-05	2.62819e-05	3.71682e-05	0	0	0	0	1.05123e-05	1.48666e-05	0	0	0	0	0	0	0	0	0	0	0	0	0
ID_366	9.28428e-06	1.31299e-05	2.78823e-05	3.94316e-05	0	0	0	0	0	0	1.22617e-05	1.73406e-05	0	0	0	0	0	0	1.22418e-05	1.73126e-05	3.74028e-05	5.28955e-05	0	0	2.80995e-05	2.05512e-05	8.5576e-05	6.53538e-05	4.35139e-05	3.64004e-05	4.3436e-05	4.43047e-05	1.47807e-05	2.0903e-05	1.10518e-05	1.56296e-05	0	0	0	0	0	0	0	0	0	0	0	0	0
ID_367	0.000515049	4.20087e-05	0.000243191	6.31409e-05	0.000251321	0.000121749	0	0	0	0	0	0	0	0	0	0	9.71534e-06	1.37396e-05	0	0	0	0	0	0	1.15857e-05	1.63847e-05	1.35446e-05	1.9155e-05	0	0	1.15845e-05	1.6383e-05	0	0	0	0	0	0	0	0	0	0	0	0	0	0	0	0	0
ID_368	9.96072e-05	4.94805e-05	0.000108337	3.81859e-05	0.000121781	0.000113192	0	0	0	0	1.22617e-05	1.73406e-05	0	0	2.40068e-05	1.71918e-05	0	0	3.09962e-05	4.38353e-05	2.31209e-05	3.26978e-05	1.93304e-05	2.73373e-05	0	0	0	0	0	0	0	0	0	0	0	0	0	0	0	0	0	0	0	0	0	0	0	0	0
ID_369	0.000114309	2.78022e-05	9.03067e-05	1.27775e-05	0.000243572	9.21521e-05	0	0	1.89254e-05	2.67646e-05	2.59e-05	3.66282e-05	0	0	0	0	0	0	0	0	0	0	0	0	0	0	0	0	0	0	1.15845e-05	1.6383e-05	1.14536e-05	1.61978e-05	0	0	0	0	0	0	0	0	0	0	0	0	0	0	0
ID_370	0.000123593	2.98589e-05	8.19744e-05	6.62595e-05	0.000133146	4.40122e-05	5.76683e-05	4.08047e-05	0	0	0	0	1.56937e-05	2.21942e-05	0	0	3.08742e-05	4.36627e-05	0	0	2.31209e-05	3.26978e-05	0	0	0	0	0	0	0	0	0	0	0	0	0	0	0	0	0	0	0	0	0	0	0	0	0	0	0
ID_371	0.00021661	9.29346e-05	4.5913e-05	3.4635e-05	9.72573e-05	6.92131e-05	0	0	0	0	0	0	0	0	1.08932e-05	1.54054e-05	2.51524e-05	1.91162e-05	1.22418e-05	1.73126e-05	0	0	0	0	0	0	0	0	0	0	8.68236e-06	1.22787e-05	0	0	0	0	0	0	0	0	0	0	0	0	0	0	0	0	0
ID_372	0.000233246	7.28309e-05	0.000145918	0.000111445	4.86286e-05	3.46065e-05	0	0	0	0	0	0	0	0	0	0	0	0	0	0	0	0	0	0	0	0	0	0	1.48485e-05	2.09989e-05	1.15845e-05	1.6383e-05	0	0	0	0	0	0	0	0	0	0	0	0	0	0	0	0	0
ID_373	0	0	0	0	0	0	2.0722e-05	2.93053e-05	0	0	0	0	0	0	3.71648e-05	3.23319e-05	1.94307e-05	2.74791e-05	2.774e-05	2.00164e-05	0	0	3.95692e-05	2.80018e-05	1.15857e-05	1.63847e-05	3.97911e-05	3.31988e-05	1.38169e-05	1.95401e-05	4.84485e-05	2.1017e-05	4.14852e-05	3.64298e-05	2.10245e-05	2.97332e-05	2.66099e-05	3.76321e-05	0	0	5.47942e-05	2.05452e-05	1.12575e-05	1.59204e-05	0	0	0	0	0
ID_374	3.65508e-05	3.39562e-05	2.78823e-05	3.94316e-05	2.59081e-05	3.66396e-05	0	0	0	0	0	0	4.97772e-05	7.03957e-05	6.56566e-05	6.69883e-05	2.00248e-05	2.83194e-05	2.774e-05	2.00164e-05	0	0	0	0	0	0	0	0	0	0	0	0	0	0	2.21036e-05	3.12592e-05	8.86997e-06	1.2544e-05	0	0	1.49303e-05	2.11146e-05	0	0	2.07542e-05	2.93509e-05	0	0	4.8341e-05
ID_375	0.00012494	2.77432e-05	0.000195605	0.000139577	0.000142698	0.000111672	2.0722e-05	2.93053e-05	0	0	0	0	0	0	0	0	0	0	0	0	0	0	0	0	0	0	0	0	0	0	0	0	0	0	0	0	0	0	0	0	0	0	0	0	0	0	0	0	0
ID_376	6.24701e-05	1.38716e-05	1.80307e-05	2.54992e-05	2.59081e-05	3.66396e-05	0	0	0	0	0	0	0	0	0	0	0	0	0	0	0	0	0	0	0	0	0	0	0	0	0	0	0	0	0	0	8.86997e-06	1.2544e-05	0	0	0	0	0	0	0	0	0	0	0
ID_377	0.000108305	4.64673e-05	9.03067e-05	1.27775e-05	0.000204495	4.97164e-05	0	0	2.18036e-05	3.08349e-05	2.59e-05	3.66282e-05	0	0	0	0	0	0	0	0	0	0	0	0	0	0	0	0	2.62819e-05	3.71682e-05	0	0	0	0	1.10518e-05	1.56296e-05	0	0	0	0	0	0	0	0	0	0	0	0	0
ID_378	9.63266e-05	6.82467e-05	0.000109857	7.77075e-05	8.45176e-05	7.65642e-05	0	0	0	0	0	0	0	0	3.71648e-05	3.23319e-05	0	0	0	0	0	0	0	0	1.6193e-05	2.29004e-05	1.97765e-05	2.79682e-05	2.62819e-05	3.71682e-05	0	0	0	0	0	0	0	0	0	0	0	0	0	0	0	0	0	0	0
ID_379	3.32701e-05	4.70511e-05	1.80307e-05	2.54992e-05	0	0	0	0	0	0	1.22617e-05	1.73406e-05	2.8138e-05	2.02906e-05	3.26797e-05	4.62161e-05	3.94555e-05	2.79087e-05	0	0	1.47304e-05	2.08319e-05	5.59597e-05	4.74367e-05	2.34922e-05	1.66161e-05	0	0	0	0	3.10838e-05	3.68348e-06	0	0	0	0	0	0	0	0	0	0	0	0	0	0	0	0	1.27018e-05
ID_380	8.6456e-05	4.98591e-05	2.78823e-05	3.94316e-05	0.000222654	0.00018965	0	0	5.05318e-05	3.67241e-05	0	0	2.48886e-05	3.51978e-05	2.62715e-05	3.71536e-05	0	0	3.09962e-05	4.38353e-05	0	0	0	0	0	0	0	0	0	0	0	0	0	0	2.15641e-05	1.52624e-05	0	0	0	0	0	0	0	0	0	0	0	0	0
ID_381	0.000106958	2.39981e-05	0.000307288	0.000141095	0.000145886	0.00010382	2.94412e-05	4.16362e-05	1.89254e-05	2.67646e-05	2.45351e-05	3.46978e-05	1.24443e-05	1.75989e-05	2.62715e-05	3.71536e-05	9.71534e-06	1.37396e-05	0	0	0	0	1.93304e-05	2.73373e-05	1.19065e-05	1.68383e-05	1.35446e-05	1.9155e-05	0	0	1.08169e-05	1.52974e-05	0	0	1.05123e-05	1.48666e-05	0	0	0	0	0	0	0	0	0	0	0	0	0
ID_382	0.000144095	7.57215e-05	1.80307e-05	2.54992e-05	0.000110426	5.31522e-05	0	0	0	0	0	0	0	0	1.31136e-05	1.85454e-05	9.71534e-06	1.37396e-05	0	0	0	0	0	0	1.15857e-05	1.63847e-05	0	0	0	0	0	0	2.62342e-05	1.89927e-05	0	0	0	0	0	0	0	0	0	0	0	0	0	0	0
ID_383	0	0	4.43937e-05	3.30082e-05	2.59081e-05	3.66396e-05	0	0	4.0729e-05	2.90147e-05	1.22617e-05	1.73406e-05	2.68871e-05	3.80242e-05	1.08932e-05	1.54054e-05	0	0	0	0	0	0	0	0	0	0	0	0	0	0	8.68236e-06	1.22787e-05	7.39033e-05	0.000104515	1.05123e-05	1.48666e-05	0	0	1.52144e-05	2.15165e-05	0	0	0	0	2.07542e-05	2.93509e-05	0	0	0
ID_384	0	0	0	0	0	0	0	0	0	0	0	0	0	0	0	0	0	0	0	0	0	0	0	0	0	0	0	0	0	0	0	0	1.19239e-05	1.6863e-05	0	0	1.36478e-05	1.93009e-05	1.39962e-05	1.97936e-05	2.98606e-05	4.22292e-05	2.43078e-05	3.43765e-05	0	0	0	0	0
ID_385	9.57403e-05	3.96251e-05	0.000173954	0.000114205	0.000102248	2.48582e-05	0	0	0	0	0	0	0	0	0	0	2.00248e-05	2.83194e-05	1.54981e-05	2.19176e-05	0	0	0	0	1.15857e-05	1.63847e-05	1.97765e-05	2.79682e-05	0	0	0	0	0	0	1.05123e-05	1.48666e-05	0	0	0	0	0	0	0	0	0	0	0	0	0
ID_386	0.00015821	3.62124e-05	0.000154404	8.04076e-05	6.81617e-05	9.63952e-05	0	0	0	0	0	0	0	0	0	0	0	0	0	0	0	0	0	0	0	0	1.35446e-05	1.9155e-05	0	0	0	0	0	0	0	0	0	0	0	0	0	0	0	0	0	0	0	0	0
ID_387	8.23859e-05	6.67942e-05	0.000240305	0.000231837	2.27206e-05	3.21317e-05	2.0722e-05	2.93053e-05	0	0	0	0	0	0	0	0	9.71534e-06	1.37396e-05	1.22418e-05	1.73126e-05	0	0	0	0	0	0	0	0	0	0	8.68236e-06	1.22787e-05	0	0	0	0	0	0	0	0	0	0	0	0	0	0	0	0	0
ID_388	0.000154343	0.000122417	0.000101678	0.000107831	0.000121781	0.000113192	0	0	2.18036e-05	3.08349e-05	0	0	0	0	0	0	2.00248e-05	2.83194e-05	0	0	0	0	0	0	1.19065e-05	1.68383e-05	0	0	0	0	0	0	0	0	0	0	0	0	0	0	0	0	0	0	0	0	0	0	0
ID_389	9.63266e-05	6.82467e-05	1.80307e-05	2.54992e-05	0.000126353	0.000133426	0	0	0	0	0	0	0	0	0	0	0	0	1.22418e-05	1.73126e-05	0	0	0	0	0	0	0	0	0	0	1.15845e-05	1.6383e-05	1.14536e-05	1.61978e-05	0	0	0	0	0	0	0	0	0	0	0	0	0	0	0
ID_390	3.65508e-05	3.39562e-05	2.78823e-05	3.94316e-05	3.08985e-05	4.36971e-05	0	0	0	0	5.18001e-05	7.32563e-05	0	0	0	0	0	0	0	0	0	0	0	0	2.34922e-05	1.66161e-05	1.97765e-05	2.79682e-05	1.48485e-05	2.09989e-05	3.3986e-05	2.8397e-05	1.19239e-05	1.6863e-05	0	0	0	0	0	0	0	0	0	0	0	0	3.49113e-05	4.93721e-05	0
ID_391	2.72665e-05	3.85607e-05	0	0	0	0	2.82271e-05	3.99191e-05	0	0	0	0	0	0	1.08932e-05	1.54054e-05	1.54371e-05	2.18314e-05	0	0	0	0	1.93304e-05	2.73373e-05	1.15857e-05	1.63847e-05	1.35446e-05	1.9155e-05	0	0	2.81816e-05	2.14805e-05	0	0	0	0	0	0	0	0	0	0	0	0	0	0	3.49113e-05	4.93721e-05	0
ID_392	0	0	0	0	2.27206e-05	3.21317e-05	0	0	2.87282e-05	4.06278e-05	2.59e-05	3.66282e-05	2.8138e-05	2.02906e-05	1.31136e-05	1.85454e-05	0	0	1.22418e-05	1.73126e-05	3.74028e-05	5.28955e-05	0	0	1.15857e-05	1.63847e-05	0	0	0	0	1.08169e-05	1.52974e-05	1.47807e-05	2.0903e-05	0	0	0	0	1.19043e-05	1.68353e-05	1.39034e-05	1.96623e-05	0	0	0	0	0	0	0
ID_393	0	0	0	0	0	0	0	0	0	0	0	0	0	0	0	0	0	0	1.22418e-05	1.73126e-05	0	0	0	0	0	0	1.97765e-05	2.79682e-05	2.76339e-05	3.90802e-05	8.68236e-06	1.22787e-05	0	0	0.000107281	7.93e-05	0	0	0	0	0	0	0	0	0	0	0	0	0
ID_394	4.58351e-05	3.41161e-05	1.80307e-05	2.54992e-05	2.59081e-05	3.66396e-05	0	0	0	0	2.45351e-05	3.46978e-05	1.56937e-05	2.21942e-05	3.71648e-05	3.23319e-05	2.00248e-05	2.83194e-05	1.22418e-05	1.73126e-05	0	0	1.72989e-05	2.44644e-05	1.19065e-05	1.68383e-05	0	0	0	0	0	0	0	0	1.5727e-05	2.22413e-05	0	0	0	0	0	0	0	0	0	0	0	0	0
ID_395	6.84737e-05	6.17843e-05	0.000162583	3.72799e-06	9.72573e-05	6.92131e-05	0	0	0	0	0	0	0	0	0	0	0	0	0	0	0	0	0	0	0	0	0	0	0	0	1.15845e-05	1.6383e-05	0	0	0	0	0	0	0	0	0	0	0	0	0	0	0	0	0
ID_396	7.36879e-05	5.71429e-05	0.000126521	5.13502e-05	4.86286e-05	3.46065e-05	0	0	0	0	0	0	0	0	0	0	2.00248e-05	2.83194e-05	0	0	0	0	1.93304e-05	2.73373e-05	0	0	0	0	0	0	0	0	1.19239e-05	1.6863e-05	0	0	0	0	0	0	0	0	0	0	0	0	0	0	0
ID_397	6.30564e-05	5.76098e-05	0.000125002	8.02949e-05	3.08985e-05	4.36971e-05	0	0	0	0	0	0	0	0	1.08932e-05	1.54054e-05	2.00248e-05	2.83194e-05	1.54981e-05	2.19176e-05	0	0	0	0	0	0	0	0	0	0	0	0	0	0	0	0	0	0	0	0	0	0	0	0	0	0	0	0	0
ID_398	3.71371e-05	5.25198e-05	0.000108491	7.68047e-05	4.86286e-05	3.46065e-05	0	0	2.18036e-05	3.08349e-05	0	0	0	0	0	0	0	0	0	0	0	0	0	0	1.6193e-05	2.29004e-05	1.27018e-05	1.79631e-05	0	0	0	0	0	0	1.5727e-05	2.22413e-05	0	0	0	0	0	0	0	0	0	0	0	0	0
ID_399	0	0	0	0	0	0	0	0	0	0	0	0	0	0	0	0	0	0	0	0	0	0	0	0	0	0	0	0	0	0	0	0	0	0	0	0	2.25177e-05	1.69637e-05	0	0	1.39034e-05	1.96623e-05	0	0	0	0	0	0	1.27018e-05
ID_400	7.31016e-05	6.79124e-05	9.8639e-05	4.37952e-05	5.68066e-05	4.06307e-05	0	0	0	0	1.22617e-05	1.73406e-05	1.24443e-05	1.75989e-05	0	0	1.94307e-05	2.74791e-05	2.774e-05	2.00164e-05	0	0	1.72989e-05	2.44644e-05	0	0	0	0	2.76339e-05	3.90802e-05	1.15845e-05	1.6383e-05	0	0	0	0	1.18569e-05	1.67682e-05	0	0	0	0	1.12575e-05	1.59204e-05	0	0	0	0	0
ID_401	5.57057e-05	7.87797e-05	2.6363e-05	3.72829e-05	0	0	0	0	0	0	0	0	0	0	1.08932e-05	1.54054e-05	9.71534e-06	1.37396e-05	0	0	0	0	0	0	0	0	1.35446e-05	1.9155e-05	0	0	2.02669e-05	1.47651e-05	1.14536e-05	1.61978e-05	1.5727e-05	2.22413e-05	0	0	0	0	0	0	0	0	0	0	0	0	0
ID_402	9.28428e-06	1.31299e-05	0	0	0	0	0	0	0	0	0	0	1.34436e-05	1.90121e-05	0	0	1.54371e-05	2.18314e-05	0	0	0	0	0	0	0	0	0	0	0	0	0	0	0	0	0	0	0	0	0	0	0	0	1.12575e-05	1.59204e-05	0	0	3.49113e-05	4.93721e-05	0
ID_403	8.83895e-05	8.10765e-06	4.5913e-05	3.4635e-05	7.63396e-05	5.68428e-05	2.94412e-05	4.16362e-05	0	0	0	0	0	0	0	0	9.71534e-06	1.37396e-05	0	0	0	0	0	0	1.15857e-05	1.63847e-05	0	0	0	0	1.15845e-05	1.6383e-05	0	0	0	0	0	0	0	0	0	0	0	0	0	0	0	0	0
ID_404	0	0	0	0	0	0	0	0	0	0	0	0	1.56937e-05	2.21942e-05	2.40068e-05	1.71918e-05	0	0	0	0	0	0	1.72989e-05	2.44644e-05	0	0	0	0	0	0	0	0	0	0	3.31554e-05	4.68888e-05	0	0	0	0	0	0	0	0	0	0	7.23561e-05	5.12575e-05	0
ID_405	3.65508e-05	3.39562e-05	0.000100158	4.85566e-05	0.000155448	0.000219837	0	0	1.89254e-05	2.67646e-05	0	0	0	0	0	0	0	0	0	0	0	0	0	0	0	0	0	0	0	0	0	0	0	0	0	0	0	0	0	0	0	0	0	0	0	0	0	0	0
ID_406	8.89758e-05	6.8654e-05	7.37954e-05	6.97041e-05	2.59081e-05	3.66396e-05	0	0	0	0	0	0	0	0	1.31136e-05	1.85454e-05	0	0	0	0	0	0	0	0	0	0	0	0	0	0	0	0	0	0	0	0	0	0	0	0	0	0	0	0	0	0	0	0	0
ID_407	3.65508e-05	3.39562e-05	9.03067e-05	1.27775e-05	9.40698e-05	8.4277e-05	0	0	0	0	0	0	0	0	1.08932e-05	1.54054e-05	0	0	0	0	0	0	0	0	0	0	0	0	0	0	2.02669e-05	1.47651e-05	0	0	1.5727e-05	2.22413e-05	0	0	0	0	0	0	0	0	0	0	0	0	0
ID_408	7.17544e-05	1.54664e-05	4.43937e-05	3.30082e-05	5.68066e-05	4.06307e-05	0	0	0	0	0	0	0	0	0	0	0	0	0	0	0	0	1.72989e-05	2.44644e-05	1.15857e-05	1.63847e-05	0	0	0	0	0	0	0	0	0	0	0	0	0	0	0	0	0	0	0	0	0	0	0
ID_409	7.17544e-05	1.54664e-05	3.60614e-05	5.09985e-05	4.54411e-05	6.42634e-05	0	0	1.89254e-05	2.67646e-05	2.45351e-05	3.46978e-05	0	0	0	0	0	0	0	0	0	0	0	0	1.15857e-05	1.63847e-05	0	0	0	0	1.15845e-05	1.6383e-05	0	0	1.05123e-05	1.48666e-05	0	0	0	0	0	0	0	0	0	0	0	0	0
ID_410	0	0	2.78823e-05	3.94316e-05	7.13492e-05	5.5836e-05	0	0	0	0	0	0	0	0	1.31136e-05	1.85454e-05	0	0	1.22418e-05	1.73126e-05	2.31209e-05	3.26978e-05	3.95692e-05	2.80018e-05	1.6193e-05	2.29004e-05	0	0	0	0	2.02669e-05	1.47651e-05	0	0	1.5727e-05	2.22413e-05	0	0	0	0	0	0	0	0	0	0	0	0	0
ID_411	0	0	1.80307e-05	2.54992e-05	0	0	0	0	2.18036e-05	3.08349e-05	0	0	0	0	0	0	0	0	0	0	0	0	0	0	0	0	0	0	0	0	0	0	0	0	0	0	1.36478e-05	1.93009e-05	0	0	0	0	8.10261e-06	1.14588e-05	0	0	2.54608e-05	3.60071e-05	0
ID_412	0	0	0	0	0	0	0	0	0	0	2.45351e-05	3.46978e-05	0	0	0	0	0	0	0	0	0	0	0	0	0	0	1.27018e-05	1.79631e-05	2.62819e-05	3.71682e-05	4.6314e-05	4.33131e-05	0	0	1.05123e-05	1.48666e-05	0	0	1.39962e-05	1.97936e-05	0	0	0	0	0	0	0	0	0
ID_413	0	0	0	0	0	0	0	0	0	0	0	0	0	0	0	0	0	0	0	0	0	0	0	0	0	0	0	0	0	0	0	0	0	0	0	0	0	0	0	0	0.000108769	2.08019e-05	0	0	0	0	3.49113e-05	4.93721e-05	0
ID_414	4.58351e-05	3.41161e-05	4.43937e-05	3.30082e-05	3.08985e-05	4.36971e-05	0	0	0	0	0	0	1.24443e-05	1.75989e-05	1.08932e-05	1.54054e-05	2.51524e-05	1.91162e-05	0	0	0	0	1.93304e-05	2.73373e-05	0	0	0	0	2.86654e-05	2.03088e-05	0	0	0	0	0	0	0	0	0	0	0	0	0	0	0	0	0	0	0
ID_415	0.000133638	8.10519e-05	1.80307e-05	2.54992e-05	7.45367e-05	6.36215e-05	0	0	0	0	0	0	0	0	0	0	0	0	0	0	0	0	0	0	0	0	0	0	0	0	0	0	0	0	0	0	0	0	0	0	0	0	0	0	0	0	0	0	0
ID_416	3.71371e-05	5.25198e-05	4.43937e-05	3.30082e-05	0.000128156	2.62617e-05	0	0	0	0	0	0	0	0	1.08932e-05	1.54054e-05	0	0	0	0	2.31209e-05	3.26978e-05	0	0	0	0	0	0	0	0	0	0	0	0	0	0	0	0	0	0	0	0	0	0	0	0	0	0	0
ID_417	8.23859e-05	6.67942e-05	9.8639e-05	4.37952e-05	5.36191e-05	3.92151e-05	0	0	0	0	0	0	0	0	0	0	0	0	0	0	0	0	0	0	0	0	0	0	0	0	0	0	0	0	0	0	0	0	0	0	0	0	0	0	0	0	0	0	0
ID_418	7.17544e-05	1.54664e-05	4.43937e-05	3.30082e-05	7.63396e-05	5.68428e-05	0	0	0	0	0	0	0	0	0	0	0	0	0	0	0	0	0	0	0	0	0	0	2.62819e-05	3.71682e-05	0	0	1.14536e-05	1.61978e-05	0	0	0	0	0	0	0	0	0	0	0	0	0	0	0
ID_419	1.85686e-05	2.62599e-05	3.60614e-05	5.09985e-05	4.54411e-05	6.42634e-05	0	0	0	0	0	0	0	0	0	0	0	0	0	0	0	0	0	0	0	0	1.27018e-05	1.79631e-05	0	0	0	0	0	0	0	0	0	0	0	0	0	0	0	0	0	0	0	0	0
ID_420	5.51194e-05	3.89819e-05	0	0	0.000102248	2.48582e-05	0	0	0	0	0	0	0	0	1.31136e-05	1.85454e-05	0	0	0	0	0	0	0	0	0	0	0	0	0	0	1.08169e-05	1.52974e-05	0	0	0	0	0	0	0	0	0	0	0	0	0	0	0	0	0
ID_421	2.78528e-05	3.93898e-05	0	0	0.000207683	1.96374e-05	0	0	0	0	0	0	0	0	0	0	0	0	0	0	0	0	0	0	0	0	0	0	0	0	0	0	0	0	0	0	0	0	0	0	0	0	0	0	0	0	0	0	0
ID_422	4.64214e-05	6.56497e-05	0.000101678	0.000107831	5.36191e-05	3.92151e-05	0	0	0	0	0	0	0	0	1.31136e-05	1.85454e-05	0	0	0	0	0	0	0	0	0	0	0	0	0	0	0	0	0	0	0	0	0	0	0	0	0	0	0	0	0	0	0	0	0
ID_423	3.71371e-05	5.25198e-05	5.42453e-05	3.84023e-05	7.13492e-05	5.5836e-05	0	0	0	0	0	0	0	0	0	0	0	0	0	0	0	0	0	0	1.15857e-05	1.63847e-05	0	0	2.62819e-05	3.71682e-05	0	0	0	0	0	0	0	0	0	0	0	0	0	0	0	0	0	0	0
ID_424	4.39016e-05	3.36633e-05	7.37954e-05	6.97041e-05	9.72573e-05	6.92131e-05	0	0	0	0	0	0	0	0	0	0	9.71534e-06	1.37396e-05	0	0	0	0	0	0	0	0	0	0	0	0	0	0	0	0	0	0	0	0	0	0	0	0	0	0	0	0	0	0	0
ID_425	0	0	1.80307e-05	2.54992e-05	2.59081e-05	3.66396e-05	0	0	0	0	0	0	0	0	0	0	1.54371e-05	2.18314e-05	1.22418e-05	1.73126e-05	0	0	0	0	0	0	1.27018e-05	1.79631e-05	0	0	3.24507e-05	4.58922e-05	0	0	0	0	0	0	0	0	0	0	0	0	0	0	0	0	0
ID_426	0	0	0	0	0	0	0	0	1.89254e-05	2.67646e-05	0	0	0	0	0	0	9.71534e-06	1.37396e-05	0	0	0	0	1.93304e-05	2.73373e-05	0	0	1.97765e-05	2.79682e-05	0	0	8.68236e-06	1.22787e-05	1.19239e-05	1.6863e-05	1.10518e-05	1.56296e-05	0	0	0	0	0	0	0	0	0	0	0	0	0
ID_427	5.51194e-05	3.89819e-05	1.80307e-05	2.54992e-05	9.90602e-05	8.36019e-05	0	0	0	0	0	0	0	0	0	0	1.54371e-05	2.18314e-05	0	0	0	0	0	0	0	0	0	0	0	0	1.15845e-05	1.6383e-05	0	0	0	0	0	0	0	0	0	0	0	0	0	0	0	0	0
ID_428	1.85686e-05	2.62599e-05	5.42453e-05	3.84023e-05	9.08822e-05	0.000128527	0	0	2.18036e-05	3.08349e-05	0	0	0	0	0	0	0	0	0	0	0	0	2.02388e-05	2.8622e-05	0	0	0	0	0	0	0	0	0	0	0	0	0	0	0	0	0	0	0	0	0	0	0	0	0
ID_429	9.28428e-06	1.31299e-05	4.43937e-05	3.30082e-05	9.72573e-05	6.92131e-05	0	0	0	0	0	0	0	0	0	0	0	0	0	0	0	0	0	0	1.15857e-05	1.63847e-05	0	0	2.62819e-05	3.71682e-05	0	0	0	0	0	0	0	0	0	0	0	0	0	0	0	0	0	0	0
ID_430	7.04072e-05	5.00102e-05	2.6363e-05	3.72829e-05	0	0	0	0	0	0	1.22617e-05	1.73406e-05	0	0	0	0	0	0	0	0	1.47304e-05	2.08319e-05	1.72989e-05	2.44644e-05	0	0	0	0	0	0	0	0	0	0	0	0	0	0	0	0	0	0	0	0	0	0	0	0	0
ID_431	0	0	5.42453e-05	3.84023e-05	0	0	0	0	0	0	0	0	0	0	0	0	0	0	0	0	2.31209e-05	3.26978e-05	0	0	0	0	0	0	0	0	0	0	2.29071e-05	3.23956e-05	1.10518e-05	1.56296e-05	1.18569e-05	1.67682e-05	1.39962e-05	1.97936e-05	0	0	0	0	0	0	0	0	0
ID_432	0	0	2.78823e-05	3.94316e-05	0	0	0	0	0	0	1.22617e-05	1.73406e-05	0	0	0	0	2.00248e-05	2.83194e-05	0	0	0	0	0	0	0	0	3.24783e-05	2.45458e-05	0	0	1.15845e-05	1.6383e-05	1.14536e-05	1.61978e-05	1.10518e-05	1.56296e-05	0	0	0	0	0	0	0	0	0	0	0	0	0
ID_433	0	0	5.27259e-05	7.45657e-05	0	0	0	0	0	0	0	0	0	0	0	0	0	0	0	0	0	0	1.93304e-05	2.73373e-05	0	0	2.62464e-05	1.85877e-05	2.62819e-05	3.71682e-05	2.02669e-05	1.47651e-05	0	0	0	0	2.25177e-05	1.69637e-05	0	0	0	0	2.83206e-05	4.00514e-05	0	0	0	0	7.12784e-05
ID_434	0	0	0	0	2.59081e-05	3.66396e-05	0	0	0	0	0	0	0	0	0	0	5.0899e-05	3.83656e-05	0	0	0	0	0	0	1.19065e-05	1.68383e-05	1.27018e-05	1.79631e-05	0	0	2.02669e-05	1.47651e-05	0	0	0	0	1.77399e-05	2.50881e-05	0	0	0	0	0	0	0	0	0	0	0
ID_435	0	0	0	0	0	0	0	0	1.89254e-05	2.67646e-05	2.45351e-05	3.46978e-05	1.34436e-05	1.90121e-05	0	0	0	0	1.54981e-05	2.19176e-05	0	0	0	0	1.15857e-05	1.63847e-05	0	0	0	0	1.15845e-05	1.6383e-05	0	0	0	0	1.18569e-05	1.67682e-05	0	0	0	0	0	0	0	0	0	0	0
ID_436	0	0	0	0	0	0	0	0	0	0	0	0	0	0	0	0	0	0	0	0	0	0	2.02388e-05	2.8622e-05	0	0	0	0	0	0	1.08169e-05	1.52974e-05	0	0	1.05123e-05	1.48666e-05	8.86997e-06	1.2544e-05	0	0	0	0	0	0	0	0	0	0	1.27018e-05
ID_437	2.78528e-05	3.93898e-05	6.24243e-05	4.57109e-05	2.59081e-05	3.66396e-05	0	0	0	0	0	0	0	0	1.31136e-05	1.85454e-05	0	0	0	0	0	0	2.02388e-05	2.8622e-05	0	0	0	0	1.48485e-05	2.09989e-05	0	0	0	0	0	0	0	0	0	0	0	0	0	0	0	0	0	0	0
ID_438	7.17544e-05	1.54664e-05	3.60614e-05	5.09985e-05	0	0	0	0	0	0	0	0	0	0	0	0	0	0	3.09962e-05	4.38353e-05	0	0	0	0	1.15857e-05	1.63847e-05	0	0	0	0	0	0	0	0	0	0	0	0	0	0	0	0	0	0	0	0	0	0	0
ID_439	4.99052e-05	7.05766e-05	9.1826e-05	6.92701e-05	3.08985e-05	4.36971e-05	0	0	0	0	0	0	0	0	0	0	0	0	0	0	0	0	0	0	0	0	0	0	0	0	0	0	0	0	0	0	0	0	0	0	0	0	0	0	0	0	0	0	0
ID_440	5.18387e-05	4.08391e-05	6.24243e-05	4.57109e-05	2.59081e-05	3.66396e-05	0	0	0	0	0	0	0	0	0	0	0	0	0	0	0	0	0	0	0	0	0	0	0	0	8.68236e-06	1.22787e-05	0	0	0	0	0	0	0	0	0	0	0	0	0	0	0	0	0
ID_441	5.18387e-05	4.08391e-05	2.78823e-05	3.94316e-05	4.86286e-05	3.46065e-05	0	0	0	0	0	0	0	0	0	0	0	0	0	0	0	0	0	0	0	0	0	0	0	0	0	0	0	0	0	0	0	0	0	0	0	0	0	0	0	0	0	0	0
ID_442	2.59193e-05	2.04195e-05	1.80307e-05	2.54992e-05	4.86286e-05	3.46065e-05	0	0	0	0	0	0	1.24443e-05	1.75989e-05	0	0	0	0	1.54981e-05	2.19176e-05	0	0	0	0	0	0	0	0	0	0	0	0	0	0	0	0	0	0	0	0	0	0	0	0	0	0	0	0	0
ID_443	3.52036e-05	2.50051e-05	9.1826e-05	6.92701e-05	0	0	0	0	0	0	0	0	0	0	0	0	0	0	0	0	2.31209e-05	3.26978e-05	0	0	0	0	0	0	0	0	1.15845e-05	1.6383e-05	0	0	0	0	0	0	0	0	0	0	0	0	0	0	0	0	0
ID_444	9.826e-05	7.96036e-05	4.5913e-05	3.4635e-05	4.86286e-05	3.46065e-05	0	0	0	0	0	0	0	0	1.08932e-05	1.54054e-05	0	0	0	0	0	0	1.72989e-05	2.44644e-05	1.19065e-05	1.68383e-05	0	0	0	0	0	0	0	0	0	0	0	0	0	0	0	0	0	0	0	0	0	0	0
ID_445	2.78528e-05	3.93898e-05	2.78823e-05	3.94316e-05	3.08985e-05	4.36971e-05	0	0	0	0	0	0	0	0	0	0	0	0	0	0	0	0	1.72989e-05	2.44644e-05	0	0	0	0	0	0	1.94993e-05	1.40337e-05	0	0	0	0	0	0	0	0	0	0	0	0	0	0	0	0	0
ID_446	4.25544e-05	4.20526e-05	0	0	4.54411e-05	6.42634e-05	0	0	0	0	0	0	0	0	0	0	0	0	0	0	0	0	0	0	2.31715e-05	3.27694e-05	1.27018e-05	1.79631e-05	0	0	0	0	0	0	0	0	0	0	0	0	0	0	0	0	0	0	0	0	0
ID_447	2.59193e-05	2.04195e-05	3.60614e-05	5.09985e-05	4.54411e-05	6.42634e-05	0	0	0	0	0	0	0	0	0	0	0	0	0	0	0	0	0	0	1.19065e-05	1.68383e-05	0	0	0	0	0	0	0	0	0	0	0	0	0	0	0	0	0	0	0	0	0	0	0
ID_448	2.59193e-05	2.04195e-05	0	0	2.59081e-05	3.66396e-05	0	0	0	0	0	0	0	0	0	0	0	0	0	0	0	0	0	0	0	0	1.97765e-05	2.79682e-05	0	0	0	0	0	0	0	0	0	0	0	0	0	0	0	0	0	0	0	0	0
ID_449	9.28428e-06	1.31299e-05	1.80307e-05	2.54992e-05	5.36191e-05	3.92151e-05	0	0	3.78508e-05	5.35292e-05	0	0	0	0	0	0	0	0	1.87868e-05	2.65685e-05	0	0	0	0	0	0	0	0	0	0	0	0	0	0	0	0	0	0	0	0	0	0	0	0	0	0	0	0	0
ID_450	4.58351e-05	3.41161e-05	1.80307e-05	2.54992e-05	0	0	0	0	0	0	4.90701e-05	6.93956e-05	0	0	0	0	0	0	0	0	0	0	0	0	0	0	0	0	0	0	1.08169e-05	1.52974e-05	0	0	0	0	0	0	0	0	0	0	0	0	0	0	0	0	0
ID_451	2.78528e-05	3.93898e-05	1.80307e-05	2.54992e-05	5.36191e-05	3.92151e-05	0	0	0	0	0	0	0	0	0	0	0	0	0	0	2.31209e-05	3.26978e-05	0	0	0	0	0	0	0	0	0	0	0	0	0	0	0	0	0	0	0	0	0	0	0	0	0	0	0
ID_452	4.58351e-05	3.41161e-05	4.43937e-05	3.30082e-05	0	0	0	0	2.87282e-05	4.06278e-05	0	0	0	0	0	0	0	0	0	0	2.31209e-05	3.26978e-05	0	0	0	0	0	0	0	0	0	0	0	0	0	0	0	0	0	0	0	0	0	0	0	0	0	0	0
ID_453	6.05367e-05	4.34328e-05	1.80307e-05	2.54992e-05	2.27206e-05	3.21317e-05	0	0	2.18036e-05	3.08349e-05	0	0	0	0	0	0	0	0	1.87868e-05	2.65685e-05	0	0	0	0	0	0	0	0	0	0	0	0	0	0	0	0	0	0	0	0	0	0	0	0	0	0	0	0	0
ID_454	2.59193e-05	2.04195e-05	2.78823e-05	3.94316e-05	2.59081e-05	3.66396e-05	0	0	0	0	0	0	1.34436e-05	1.90121e-05	0	0	0	0	0	0	0	0	0	0	0	0	0	0	0	0	0	0	0	0	0	0	0	0	0	0	0	0	0	0	0	0	0	0	0
ID_455	2.59193e-05	2.04195e-05	2.78823e-05	3.94316e-05	4.86286e-05	3.46065e-05	0	0	0	0	0	0	0	0	0	0	0	0	0	0	0	0	0	0	0	0	0	0	0	0	1.15845e-05	1.6383e-05	0	0	0	0	0	0	0	0	0	0	0	0	0	0	0	0	0
ID_456	3.65508e-05	3.39562e-05	1.80307e-05	2.54992e-05	6.81617e-05	9.63952e-05	0	0	0	0	0	0	0	0	0	0	0	0	0	0	0	0	0	0	0	0	0	0	0	0	0	0	0	0	0	0	0	0	0	0	0	0	0	0	0	0	0	0	0
ID_457	1.66351e-05	2.35255e-05	4.43937e-05	3.30082e-05	5.36191e-05	3.92151e-05	0	0	0	0	0	0	0	0	0	0	0	0	0	0	0	0	0	0	0	0	0	0	0	0	1.15845e-05	1.6383e-05	0	0	0	0	0	0	0	0	0	0	0	0	0	0	0	0	0
ID_458	1.66351e-05	2.35255e-05	2.6363e-05	3.72829e-05	2.27206e-05	3.21317e-05	0	0	0	0	0	0	1.56937e-05	2.21942e-05	0	0	0	0	0	0	0	0	0	0	0	0	0	0	0	0	1.08169e-05	1.52974e-05	1.47807e-05	2.0903e-05	0	0	0	0	0	0	0	0	0	0	0	0	0	0	0
ID_459	0	0	2.78823e-05	3.94316e-05	0	0	2.82271e-05	3.99191e-05	0	0	0	0	0	0	2.62715e-05	3.71536e-05	0	0	0	0	0	0	1.93304e-05	2.73373e-05	0	0	0	0	0	0	0	0	0	0	0	0	0	0	0	0	0	0	0	0	0	0	0	0	0
ID_460	0	0	1.80307e-05	2.54992e-05	7.63396e-05	5.68428e-05	0	0	0	0	0	0	0	0	0	0	0	0	1.54981e-05	2.19176e-05	0	0	0	0	0	0	0	0	1.48485e-05	2.09989e-05	0	0	0	0	0	0	0	0	0	0	0	0	0	0	0	0	0	0	0
ID_461	0	0	0	0	6.81617e-05	9.63952e-05	2.0722e-05	2.93053e-05	1.89254e-05	2.67646e-05	0	0	0	0	0	0	0	0	0	0	0	0	0	0	0	0	0	0	0	0	0	0	0	0	0	0	0	0	0	0	0	0	0	0	0	0	0	0	0
ID_462	0	0	0	0	0	0	0	0	0	0	0	0	0	0	0	0	0	0	0	0	0	0	0	0	0	0	0	0	0	0	0	0	0	0	0	0	0	0	0	0	0	0	0	0	0	0	0	0	1.27018e-05
ID_463	1.85686e-05	2.62599e-05	0	0	0	0	0	0	0	0	0	0	0	0	0	0	0	0	0	0	0	0	0	0	0	0	0	0	0	0	8.68236e-06	1.22787e-05	0	0	0	0	0	0	0	0	0	0	0	0	0	0	0	0	0
ID_464	1.66351e-05	2.35255e-05	0	0	7.13492e-05	5.5836e-05	0	0	0	0	0	0	0	0	0	0	0	0	0	0	0	0	0	0	0	0	0	0	0	0	0	0	0	0	0	0	0	0	0	0	0	0	0	0	0	0	0	0	0
ID_465	0	0	4.5913e-05	3.4635e-05	2.27206e-05	3.21317e-05	0	0	0	0	0	0	0	0	0	0	0	0	0	0	0	0	0	0	0	0	0	0	0	0	0	0	0	0	1.05123e-05	1.48666e-05	0	0	0	0	0	0	0	0	0	0	0	0	0
ID_466	0	0	0	0	2.59081e-05	3.66396e-05	0	0	0	0	2.59e-05	3.66282e-05	0	0	0	0	0	0	1.22418e-05	1.73126e-05	1.47304e-05	2.08319e-05	0	0	0	0	0	0	0	0	0	0	0	0	0	0	0	0	0	0	0	0	0	0	0	0	0	0	0
ID_467	0	0	0	0	0	0	0	0	0	0	0	0	0	0	0	0	0	0	1.54981e-05	2.19176e-05	0	0	0	0	0	0	0	0	0	0	0	0	0	0	0	0	0	0	0	0	0	0	0	0	0	0	0	0	0
ID_468	9.28428e-06	1.31299e-05	0	0	0	0	0	0	0	0	0	0	0	0	0	0	0	0	0	0	0	0	0	0	0	0	0	0	0	0	0	0	0	0	1.10518e-05	1.56296e-05	0	0	0	0	0	0	0	0	0	0	0	0	0
ID_469	4.58351e-05	3.41161e-05	0	0	3.08985e-05	4.36971e-05	0	0	0	0	0	0	0	0	0	0	9.71534e-06	1.37396e-05	0	0	2.31209e-05	3.26978e-05	0	0	0	0	0	0	1.48485e-05	2.09989e-05	0	0	0	0	0	0	0	0	0	0	0	0	0	0	0	0	0	0	0
ID_470	1.66351e-05	2.35255e-05	0	0	0	0	0	0	0	0	0	0	0	0	0	0	0	0	0	0	0	0	0	0	0	0	0	0	1.48485e-05	2.09989e-05	0	0	0	0	0	0	0	0	0	0	0	0	0	0	0	0	0	0	0
[truncated: 23 more columns]

## Sheet: Note
Relative Percentage of abundance as average for triplicate reactors.
Stdev: Standard Deviation
ID: As these are collapsed ASVs to a single taxonomical identification these are not meaningful
